# Supplementary material for: Widespread somatic L1 retrotransposition occurs early during gastrointestinal cancer evolution
Source: HighWire-hosted journal article supplement (doi:10.1101/gr.196238.115), 2015-08-10
Supplement: Supplemental_References.docx [file Supplemental_References.docx]

Supplemental references

Beck CR, Collier P, Macfarlane C, Malig M, Kidd JM, Eichler EE, Badge RM, Moran JV. 2010. LINE-1 retrotransposition activity in human genomes*. Cell* **141**: 1159-1170.

Ewing AD, Kazazian HH,Jr. 2011. Whole-genome resequencing allows detection of many rare LINE-1 insertion alleles in humans*. Genome Res* **21**: 985-990.

Kuhn A, Ong YM, Cheng CY, Wong TY, Quake SR, Burkholder WF. 2014. Linkage disequilibrium and signatures of positive selection around LINE-1 retrotransposons in the human genome*. Proc Natl Acad Sci U S A* **111**: 8131-8136.

Quinlan AR, Hall IM. 2010. BEDTools: a flexible suite of utilities for comparing genomic features*. Bioinformatics* **26**: 841-842.

Stewart C, Kural D, Stromberg MP, Walker JA, Konkel MK, Stutz AM, Urban AE, Grubert F, Lam HY, Lee WP, et al. 2011. A comprehensive map of mobile element insertion polymorphisms in humans*. PLoS Genet* **7**: e1002236.

Wang J, Song L, Grover D, Azrak S, Batzer MA, Liang P. 2006. dbRIP: a highly integrated database of retrotransposon insertion polymorphisms in humans*. Hum Mutat* **27**: 323-329.
