# Supplementary material for: Widespread somatic L1 retrotransposition occurs early during gastrointestinal cancer evolution
Source: HighWire-hosted journal article supplement (doi:10.1101/gr.196238.115), 2015-08-10
Supplement: Table_S1.xlsx.tar.gz [file Ewing et al. Table S1.xlsx]

## Sheet: Sheet1
Sample Name	Mapped Reads	Unmapped Reads	Fraction Mapped	Est. Ref. Sensitivity
Colorectal, normal	149922146	6093957	0.969112	0.962739
Colorectal, polyp	156182587	5599739	0.96094	0.953676
Colorectal, cancer	172391735	5046121	0.965387	0.950655
Colorectal, metastasis	149202929	4755418	0.971561	0.945619
Pancreas, normal	327898419	3994405	0.969117	0.946939
Pancreas, cancer section 1	139807942	2867526	0.987965	0.976531
Pancreas, cancer section 2	177743294	3018410	0.979902	0.956122
Pancreas, metastasis	170619104	5437064	0.983302	0.963265
TGCT, normal	109354305	2245652	0.979464	0.946276
TGCT, tumor	172947810	1340888	0.992247	0.985348
Gastric, normal section 1	145043611	5456140	0.962383	0.943743
Gastric, normal section 2	135815621	5662689	0.958306	0.931114
Gastric, cancer section 1	136710416	5730477	0.958083	0.944891
Gastric, cancer section 2	128888211	5715613	0.955654	0.926521
