# Supplementary material for: Widespread somatic L1 retrotransposition occurs early during gastrointestinal cancer evolution
Source: HighWire-hosted journal article supplement (doi:10.1101/gr.196238.115), 2015-08-10
Supplement: Table_S5.xlsx.tar.gz [file Ewing et al. Table S5.xlsx]

## Sheet: Sheet1
GI accession	RefSeq accession	Gene symbol	Description	# Unique Peptides	N2/N1	N2/N1 Variability [%]	C1/N1	C1/N1 Variability [%]	C2/N1	C2/N1 Variability [%]
83367083	NP_055217.2	UQCRQ	cytochrome b-c1 complex subunit 8	1	1.08338	n/a	70.0351	n/a	76.101	n/a
299523253	NP_542197.3	COL11A1	collagen alpha-1(XI) chain isoform C preproprotein	1	0.998666	n/a	46.2829	n/a	44.0768	n/a
194248081	NP_001123539.1	TRIM2	tripartite motif-containing protein 2 isoform 2	3	1.14057	17.0661	33.3665	25.6403	31.5568	41.6619
4504191	NP_000170.1	MSH6	DNA mismatch repair protein Msh6	4	1.16241	n/a	25.1619	n/a	23.9865	n/a
149999611	NP_003125.3	SRP14	signal recognition particle 14 kDa protein	2	0.892141	4.16716	19.1142	5.03867	18.0642	1.99894
30181236	NP_689940.3	CPNE2	copine-2	1	1.12437	n/a	17.7748	n/a	18.1331	n/a
10800138	NP_066407.1	HIST1H2BD	histone H2B type 1-D	2	1.21875	76.9103	16.5939	61.6422	12.9768	47.4094
114796642	NP_001041664.1	RCC1	regulator of chromosome condensation isoform c	1	0.943714	n/a	15.9828	n/a	15.6788	n/a
4885193	NP_005215.1	ARID3A	AT-rich interactive domain-containing protein 3A	1	0.9859	62.9194	15.074	35.4323	14.3648	36.1814
93141047	NP_004361.3	COL12A1	collagen alpha-1(XII) chain long isoform precursor	10	0.92393	49.8798	14.1402	78.2546	13.7559	60.0739
5031749	NP_005508.1	HMGN2	non-histone chromosomal protein HMG-17	1	0.961193	n/a	13.7277	n/a	13.1771	n/a
225007648	NP_055844.2	POP1	ribonucleases P/MRP protein subunit POP1	1	0.95614	n/a	13.0949	n/a	10.3171	n/a
116268091	NP_077273.2	PHF23	PHD finger protein 23	1	1.988	n/a	12.7222	n/a	10.6742	n/a
389886545	NP_001254509.1	PRC1	protein regulator of cytokinesis 1 isoform 4	1	2.58873	n/a	12.3134	n/a	12.4244	n/a
93102371	NP_060783.3	PBRM1	protein polybromo-1	1	1.85956	n/a	11.7281	n/a	13.7368	n/a
34996489	NP_060404.3	PHIP	PH-interacting protein	1	0.784032	n/a	11.5473	n/a	10.7068	n/a
13129104	NP_077003.1	CCDC86	coiled-coil domain-containing protein 86	1	0.877828	n/a	11.2929	n/a	10.275	n/a
21361625	NP_060773.3	EXOC2	exocyst complex component 2	1	1.22305	n/a	11.1132	n/a	9.85592	n/a
47132555	NP_997643.1	FN1	fibronectin isoform 4 preproprotein	17	0.98556	13.4099	10.9901	380.202	10.3828	706.509
109698611	NP_777578.2	C19orf59	mast cell-expressed membrane protein 1	1	0.872921	n/a	10.0982	n/a	9.27882	n/a
48255933	NP_004956.5	HMGN1	non-histone chromosomal protein HMG-14	1	1.12282	n/a	10.0074	n/a	9.3635	n/a
37595530	NP_004418.2	PHC2	polyhomeotic-like protein 2 isoform b	1	0.646936	n/a	9.9377	n/a	8.24515	n/a
45267832	NP_055744.2	FASTKD2	FAST kinase domain-containing protein 2	1	1.21118	n/a	9.74216	n/a	11.1644	n/a
253970504	NP_001156758.1	EWSR1	RNA-binding protein EWS isoform 4	2	1.18731	15.3425	9.69818	24.1608	9.99772	16.6873
21237808	NP_620706.1	SMARCC2	SWI/SNF complex subunit SMARCC2 isoform b	2	0.864431	n/a	9.61002	n/a	9.88911	n/a
13236587	NP_077310.1	TMEM43	transmembrane protein 43	1	0.769518	3.91528	9.14446	39.7237	11.0789	17.1319
166295179	NP_001107590.1	C17orf85	uncharacterized protein C17orf85	1	0.834139	n/a	9.11166	n/a	8.86872	n/a
343168772	NP_001230210.1	ALCAM	CD166 antigen isoform 3 precursor	4	0.830507	14.9639	8.84458	n/a	1.04758	93.8142
118582262	NP_001071643.1	SLC29A1	equilibrative nucleoside transporter 1	1	1.19151	n/a	8.50134	n/a	9.98915	n/a
118582269	NP_001071634.1	SRSF1	serine/arginine-rich splicing factor 1 isoform 2	3	0.685299	20.7076	8.36739	19.1506	7.15834	19.1706
258614015	NP_001158245.1	BCAT2	branched-chain-amino-acid aminotransferase, mitochondrial isoform b	1	2.71699	n/a	8.35968	n/a	8.48334	n/a
46852388	NP_060707.2	CCAR1	cell division cycle and apoptosis regulator protein 1	2	1.3234	n/a	8.30368	n/a	8.89403	n/a
5292161	NP_002801.1	PSMD4	26S proteasome non-ATPase regulatory subunit 4	4	0.661689	19.6701	8.09861	n/a	1.00229	17616.3
55770900	NP_060791.3	BRIX1	ribosome biogenesis protein BRX1 homolog	1	0.877629	n/a	7.97787	n/a	8.052	n/a
5453597	NP_006126.1	CAPZA1	F-actin-capping protein subunit alpha-1	1		n/a	7.79935	n/a	9.29949	n/a
154354979	NP_036466.2	MYO10	unconventional myosin-X	1	1.29607	n/a	7.6951	n/a	8.01591	n/a
385198059	NP_001245237.1	NOP2	putative ribosomal RNA methyltransferase NOP2 isoform 2	6	1.11478	0.655623	7.55888	21.7924	7.12933	23.7284
5032189	NP_005648.1	TP53BP1	tumor suppressor p53-binding protein 1 isoform 3	7	1.0021	8.54829	7.54095	228.212	7.17504	183.409
42714611	NP_976222.1	LCN15	lipocalin-15 precursor	2	0.906402	24.2191	7.31056	6.78301	7.07614	21.2569
33356174	NP_002678.2	PNN	pinin	4	1.0312	14.0096	7.0843	110.432	6.60947	77.1296
6912486	NP_036453.1	LSM4	U6 snRNA-associated Sm-like protein LSm4 isoform 1	1	0.892618	n/a	6.95151	n/a	6.15815	n/a
224994199	NP_001139324.1	PROM1	prominin-1 isoform 4 precursor	6	0.853845	16.7189	6.92322	169.184	6.59692	170.568
62739181	NP_001015056.1	RTKN	rhotekin isoform c	1	1.56111	n/a	6.81901	n/a	6.48013	n/a
38149981	NP_937863.1	SNRPB2	U2 small nuclear ribonucleoprotein B''	2	0.896766	3.37309	6.80886	32.8573	6.4113	32.2993
222352111	NP_115766.3	MKI67IP	MKI67 FHA domain-interacting nucleolar phosphoprotein	3	0.877255	16.9987	6.65789	0.334455	6.96707	3.07818
38327634	NP_006764.3	DDX18	ATP-dependent RNA helicase DDX18	5	1.11871	16.4759	6.61599	580.14	5.72435	869.772
14150149	NP_115726.1	C7orf50	uncharacterized protein C7orf50	1	1.12962	n/a	6.58485	n/a	5.8971	n/a
190684675	NP_006288.2	XRCC1	DNA repair protein XRCC1	1	0.963721	n/a	6.55726	n/a	6.68486	n/a
70166599	NP_001002019.1	PUS1	tRNA pseudouridine synthase A, mitochondrial isoform 2	4	1.22235	13.3595	6.52584	173.668	6.70223	179.181
189083684	NP_001121093.1	GALE	UDP-glucose 4-epimerase	1	1.04009	n/a	6.40675	n/a	6.57044	n/a
19923262	NP_004153.2	RAB5A	ras-related protein Rab-5A	1	0.83106	n/a	6.37881	n/a	6.32164	n/a
6678271	NP_031401.1	TARDBP	TAR DNA-binding protein 43	4	0.876403	18.2088	6.10583	286.744	5.82675	305.891
170784831	NP_057311.2	SUCO	SUN domain-containing ossification factor isoform 2 precursor	1	0.764126	n/a	6.03655	n/a	4.54915	n/a
12229217	NP_056154.1	ADNP	activity-dependent neuroprotector homeobox protein	1	0.895564	n/a	6.02889	n/a	5.24329	n/a
20544151	NP_057671.2	CBX3	chromobox protein homolog 3	3	0.957707	10.7027	6.00099	153.442	6.97028	106.509
186928847	NP_116219.2	CIRH1A	cirhin	3	0.917373	0.655746	5.95797	34.5653	6.07768	26.4033
10947135	NP_001081.1	ABCF1	ATP-binding cassette sub-family F member 1 isoform b	3	1.157	4.61959	5.89516	17.7699	6.76393	37.13
34101286	NP_057191.2	ZFR	zinc finger RNA-binding protein	3	0.977452	12.6381	5.89325	25.238	3.60046	94.011
384871702	NP_001245210.1	MSH2	DNA mismatch repair protein Msh2 isoform 2	2	1.86646	137.84	5.87583	639.164	5.98178	385.676
21361356	NP_006800.2	TOMM34	mitochondrial import receptor subunit TOM34	2	0.894939	7.65767	5.79323	40.992	5.7675	41.1113
4507499	NP_003243.1	TIAL1	nucleolysin TIAR isoform 1	2	1.02847	n/a	5.77531	900.293	5.41567	1105.35
237649015	NP_006815.2	EBNA1BP2	probable rRNA-processing protein EBP2 isoform 2	2	1.22795	34.1663	5.74498	7.49007	5.67038	6.87463
156415994	NP_057121.2	UTP11L	probable U3 small nucleolar RNA-associated protein 11	1	0.906898	n/a	5.7207	n/a	5.09873	n/a
91206454	NP_001035146.1	FAM133B	protein FAM133B isoform 2	2	1.35623	n/a	5.62254	n/a	5.27995	n/a
166197706	NP_056268.2	THUMPD3	THUMP domain-containing protein 3	1	1.15393	n/a	5.5497	n/a	5.08106	n/a
42491362	NP_963906.1	IKBIP	inhibitor of nuclear factor kappa-B kinase-interacting protein isoform 2	2	0.905858	42.9725	5.50073	14.9027	3.91863	23.6753
49574529	NP_060898.2	UTP6	U3 small nucleolar RNA-associated protein 6 homolog	1	1.02233	n/a	5.4305	n/a	5.57167	n/a
21700763	NP_653171.1	HN1L	hematological and neurological expressed 1-like protein	1	1.99221	n/a	5.40721	n/a	4.78424	n/a
28872796	NP_005185.2	CEBPB	CCAAT/enhancer-binding protein beta	1	0.478288	n/a	5.38297	n/a	4.89999	n/a
21536417	NP_647601.1	BIN1	myc box-dependent-interacting protein 1 isoform 10	2	0.891708	n/a	5.34977	n/a	6.00318	n/a
226509740	NP_067051.2	SCAF1	splicing factor, arginine/serine-rich 19	1	0.817763	n/a	5.31603	n/a	3.64025	n/a
40806219	NP_954994.1	THYN1	thymocyte nuclear protein 1 isoform 2	2	0.984918	n/a	5.30999	n/a	5.19021	n/a
4758024	NP_004636.1	COIL	coilin	1	0.888636	n/a	5.30826	n/a	5.42799	n/a
42741659	NP_000918.2	ABCB1	multidrug resistance protein 1	6	1.00112	36.2188	5.2749	31.4237	4.99681	52.1954
217330646	NP_006704.3	SUB1	activated RNA polymerase II transcriptional coactivator p15	2	1.16393	34.1145	5.27325	197.318	5.07355	240.567
4506681	NP_001006.1	RPS11	40S ribosomal protein S11	6	0.908964	10.8356	5.27192	88.5845	4.78025	110.968
48762934	NP_000080.2	COL1A2	collagen alpha-2(I) chain precursor	3	0.971544	1.38242	5.25127	48.3845	5.3082	51.7644
145275216	NP_115948.4	KIF2B	kinesin-like protein KIF2B	1		n/a	5.24359	n/a	4.93815	n/a
4507171	NP_003109.1	SPARC	SPARC precursor	2	0.77934	30.3384	5.16169	96.9275	4.78228	108.053
83641870	NP_001032827.1	NPM1	nucleophosmin isoform 3	4	1.01029	12.6122	5.13629	73.4134	5.61246	55.9572
4506411	NP_002874.1	RANGAP1	ran GTPase-activating protein 1	3	1.36654	281.695	5.10982	n/a	7.4707	n/a
13491174	NP_075385.1	MARCKSL1	MARCKS-related protein	2	1.03859	4.06659	5.07319	6.06658	4.90643	8.10011
7661948	NP_055545.1	MLEC	malectin precursor	2	0.760995	n/a	5.05444	n/a	4.06923	n/a
40255029	NP_620126.2	CCDC126	coiled-coil domain-containing protein 126 precursor	1	0.738554	n/a	4.98098	n/a	3.62518	n/a
21361423	NP_055252.2	SLC39A1	zinc transporter ZIP1 isoform a	1		n/a	4.92031	n/a	4.46216	n/a
56118219	NP_001007226.1	IGF2BP2	insulin-like growth factor 2 mRNA-binding protein 2 isoform b	1	1.34743	n/a	4.90339	n/a	5.08709	n/a
61742791	NP_001013272.1	LSP1	lymphocyte-specific protein 1 isoform 2	2	1.03841	2.46139	4.88915	n/a	2.40862	n/a
178056552	NP_055680.3	NCAPD2	condensin complex subunit 1	1	0.854779	n/a	4.84208	n/a	4.85397	n/a
71979932	NP_003477.4	SLC7A5	large neutral amino acids transporter small subunit 1	2	0.998045	n/a	4.71865	n/a	4.66884	n/a
10047102	NP_057388.1	RSL24D1	probable ribosome biogenesis protein RLP24	1	0.985162	n/a	4.71762	n/a	4.90993	n/a
4507241	NP_003137.1	SSRP1	FACT complex subunit SSRP1	2	1.13139	n/a	4.70768	n/a	4.94101	n/a
14249722	NP_116317.1	TMEM141	transmembrane protein 141	1	0.868383	n/a	4.70171	n/a	4.53087	n/a
399498566	NP_001257711.1	TFAM	transcription factor A, mitochondrial isoform 2 precursor	4	1.41497	44.1448	4.68558	6.36825	4.94163	6.5311
167234419	NP_005110.2	THRAP3	thyroid hormone receptor-associated protein 3	3	1.10495	23.5017	4.68317	15.5027	3.00144	74.3783
4503515	NP_003747.1	EIF3H	eukaryotic translation initiation factor 3 subunit H	3	0.889854	5.4397	4.67233	15.9459	5.16006	14.9959
387528025	NP_001248363.1	AARSD1	alanyl-tRNA editing protein Aarsd1	2	0.947374	n/a	4.64046	n/a	4.47959	n/a
224586855	NP_001139147.1	SORBS2	sorbin and SH3 domain-containing protein 2 isoform 8	1	0.451256	n/a	4.63647	n/a	5.00939	n/a
22748883	NP_689630.1	TMEM68	transmembrane protein 68	1	2.70214	n/a	4.57094	n/a	5.18477	n/a
224589071	NP_055568.3	BMS1	ribosome biogenesis protein BMS1 homolog	2	0.873582	19.5404	4.57025	27.1876	4.51738	21.5435
20336205	NP_612114.1	ATRX	transcriptional regulator ATRX isoform 2	1	1.63699	n/a	4.56273	n/a	4.41163	n/a
87116683	NP_659419.3	ZFC3H1	zinc finger C3H1 domain-containing protein	1	2.67036	n/a	4.5213	n/a	4.25931	n/a
351721324	NP_001234930.1	SET	protein SET isoform 4	4	1.13364	33.3838	4.51896	104.617	5.4856	176.384
7661696	NP_054796.1	FAM32A	protein FAM32A	1		n/a	4.50704	n/a	3.58459	n/a
4759276	NP_004695.1	RRP9	U3 small nucleolar RNA-interacting protein 2	3	0.981584	0.57018	4.49439	59.4128	4.54351	70.4913
313661502	NP_001186363.1	NIP7	60S ribosome subunit biogenesis protein NIP7 homolog isoform 2	1	0.901067	n/a	4.49395	n/a	4.42997	n/a
86991438	NP_001034554.1	SRSF5	serine/arginine-rich splicing factor 5	1	0.966389	n/a	4.4627	n/a	3.62649	n/a
22208967	NP_665906.1	HMGA1	high mobility group protein HMG-I/HMG-Y isoform a	1	1.09815	n/a	4.4496	n/a	4.4103	n/a
4557495	NP_001317.1	CSTF3	cleavage stimulation factor subunit 3 isoform 1	2	0.785648	n/a	4.42868	n/a	4.12513	n/a
38455402	NP_005555.2	LCN2	neutrophil gelatinase-associated lipocalin precursor	1	1.25809	n/a	4.40403	n/a	4.43297	n/a
7657581	NP_055066.1	SLC25A13	calcium-binding mitochondrial carrier protein Aralar2 isoform 2	3		n/a	4.39014	n/a	5.44041	n/a
4757714	NP_004291.1	ACP1	low molecular weight phosphotyrosine protein phosphatase isoform c	1	2.1165	n/a	4.3811	n/a	5.09789	n/a
54112403	NP_060250.2	CHD7	chromodomain-helicase-DNA-binding protein 7	1	0.85254	n/a	4.36779	n/a	4.52854	n/a
18375501	NP_001632.2	APEX1	DNA-(apurinic or apyrimidinic site) lyase	2	0.989863	n/a	4.36271	289.398	6.22802	114.981
10047140	NP_064528.1	PNO1	RNA-binding protein PNO1	1	1.93982	n/a	4.35182	n/a	3.27155	n/a
4504373	NP_000512.1	HEXB	beta-hexosaminidase subunit beta preproprotein	1	2.88157	n/a	4.32722	n/a	1.73618	n/a
32483374	NP_006383.2	NOP56	nucleolar protein 56	7	0.93899	10.0587	4.31452	167.026	3.92975	135.955
4757818	NP_004879.1	ATP6V1G1	V-type proton ATPase subunit G 1	1	1.06882	n/a	4.30896	n/a	3.59039	n/a
109288012	NP_001035887.1	SLC16A3	monocarboxylate transporter 4	2	0.888254	30.7166	4.29767	48.8886	3.72793	58.3933
14028877	NP_071942.1	MRPS25	28S ribosomal protein S25, mitochondrial	2	1.97019	n/a	4.25771	n/a	3.33721	n/a
42542392	NP_005751.2	CEBPZ	CCAAT/enhancer-binding protein zeta	4	0.908539	12.7275	4.24806	41.8097	4.63201	18.8791
296434227	NP_001171783.1	KLHDC4	kelch domain-containing protein 4 isoform 3	2	1.83505	n/a	4.21531	n/a	3.34898	n/a
25901062	NP_062539.1	GPCPD1	glycerophosphocholine phosphodiesterase GPCPD1	1	0.849933	n/a	4.19936	n/a	2.4073	n/a
145309300	NP_112557.2	CDK13	cyclin-dependent kinase 13 isoform 2	1	0.368365	n/a	4.16493	n/a	4.6104	n/a
19923206	NP_002056.2	GLUL	glutamine synthetase	1		n/a	4.16094	n/a	1.47297	n/a
4506203	NP_002790.1	PSMB7	proteasome subunit beta type-7 proprotein	1	0.917118	6.67607	4.1531	2.2411	4.01731	3.4477
288915539	NP_001165806.1	PLS3	plastin-3 isoform 2	4	0.751174	62.3274	4.11755	162.068	4.6396	130.36
9966799	NP_065101.1	UTP3	something about silencing protein 10	1	1.10306	n/a	4.09837	n/a	4.58102	n/a
73695475	NP_060542.4	HEATR1	HEAT repeat-containing protein 1	4	1.29306	26.2993	4.08934	15.4151	3.55754	41.6034
32171238	NP_061330.2	BAIAP2L1	brain-specific angiogenesis inhibitor 1-associated protein 2-like protein 1	2	1.11983	n/a	4.08491	n/a	3.20131	n/a
4503175	NP_003458.1	CXCR4	C-X-C chemokine receptor type 4 isoform b	1	1.08936	n/a	4.08099	n/a	4.45974	n/a
312433998	NP_001186078.1	LTF	lactotransferrin isoform 2	4	0.94018	30.2867	4.06422	54.625	3.52606	74.2578
4502105	NP_001144.1	ANXA4	annexin A4	8	0.910582	21.049	4.0113	34.6804	3.98421	38.8564
153266841	NP_000033.2	APOH	beta-2-glycoprotein 1 precursor	2	0.826525	9.46476	3.99669	56.5841	3.28931	60.7432
29826335	NP_003899.2	EIF2S2	eukaryotic translation initiation factor 2 subunit 2	3	0.96571	2.14907	3.99668	63.8896	3.99269	5.20154
189217428	NP_001121190.1	LAMA3	laminin subunit alpha-3 isoform 4 precursor	2	0.933282	n/a	3.95528	n/a	4.06244	n/a
414144872	NP_001258664.1	COPZ1	coatomer subunit zeta-1 isoform 3	1	0.929401	n/a	3.95395	n/a	4.32642	n/a
186928854	NP_005821.2	MRPS31	28S ribosomal protein S31, mitochondrial	2	1.06507	n/a	3.93307	n/a	3.68068	n/a
4506901	NP_003008.1	SRSF3	serine/arginine-rich splicing factor 3	3	0.896368	8.97107	3.92992	93.7023	3.71758	93.8655
71773201	NP_001025189.1	APRT	adenine phosphoribosyltransferase isoform b	2	0.862383	19.6999	3.92301	40.9398	3.55104	42.7043
116256354	NP_001837.2	COL4A2	collagen alpha-2(IV) chain preproprotein	1	0.888122	n/a	3.91714	n/a	3.43598	n/a
9506713	NP_061856.1	GAR1	H/ACA ribonucleoprotein complex subunit 1	1	0.925011	n/a	3.89615	n/a	3.78096	n/a
63497679	NP_689592.2	C1orf131	uncharacterized protein C1orf131	2	1.26497	n/a	3.8725	n/a	3.08639	n/a
7657198	NP_055288.1	DIMT1	probable dimethyladenosine transferase	1	1.19651	100.375	3.85952	28.3119	3.61735	34.6525
4505021	NP_002328.1	LRPAP1	alpha-2-macroglobulin receptor-associated protein precursor	3	0.759958	20.6635	3.83877	28.4723	3.03953	36.1322
299758423	NP_001177652.1	LRSAM1	E3 ubiquitin-protein ligase LRSAM1 isoform 2	1	1.1043	n/a	3.82853	n/a	4.03338	n/a
14211540	NP_066014.1	MOV10	putative helicase MOV-10	2	1.18528	n/a	3.80592	n/a	3.57055	n/a
16753227	NP_000961.2	RPL6	60S ribosomal protein L6	7	1.01559	21.4471	3.79677	264.391	3.70928	152.456
34335200	NP_874392.1	CREM	cAMP-responsive element modulator isoform 10	1	0.897705	n/a	3.78928	n/a	3.74114	n/a
156071452	NP_001095132.1	NRD1	nardilysin isoform b precursor	1	1.15265	n/a	3.77027	n/a	3.93628	n/a
8051636	NP_009166.2	XPOT	exportin-T	1	0.939446	n/a	3.76967	n/a	3.43953	n/a
5453906	NP_006310.1	CDIPT	CDP-diacylglycerol--inositol 3-phosphatidyltransferase	1	0.872673	n/a	3.76947	n/a	4.16877	n/a
120587023	NP_055318.2	UTP20	small subunit processome component 20 homolog	4	0.967126	108.074	3.75022	270.51	3.75334	107.066
410171122	XP_003960151.1	LOC101060318	eukaryotic translation initiation factor 1A, X-chromosomal-like	4	0.99882	34.7306	3.70157	44.5131	3.4623	33.3529
4507525	NP_003253.1	SEC62	translocation protein SEC62	2	2.98875	n/a	3.69978	n/a	3.90524	n/a
322506101	NP_001190178.1	EZH2	histone-lysine N-methyltransferase EZH2 isoform e	1	1.20957	n/a	3.66873	n/a	3.78653	n/a
8923444	NP_060308.1	NHP2	H/ACA ribonucleoprotein complex subunit 2 isoform a	1	0.948481	n/a	3.66164	n/a	3.57236	n/a
115529451	NP_001070151.1	UBTF	nucleolar transcription factor 1 isoform b	2	0.902139	n/a	3.65681	n/a	3.49417	n/a
4758774	NP_004539.1	NDUFB10	NADH dehydrogenase [ubiquinone] 1 beta subcomplex subunit 10	1	0.864887	n/a	3.64763	n/a	3.66732	n/a
376319206	NP_001243657.1	USP39	U4/U6.U5 tri-snRNP-associated protein 2 isoform 4	2	1.08689	35.9011	3.64679	48.6654	3.52644	49.9098
269784739	NP_001161464.1	PQBP1	polyglutamine-binding protein 1 isoform 6	1	1.12798	n/a	3.64584	n/a	3.20808	n/a
18379334	NP_542161.1	RNPS1	RNA-binding protein with serine-rich domain 1	3	1.00381	n/a	3.63454	n/a	3.74883	n/a
7657575	NP_036370.2	SIRT1	NAD-dependent protein deacetylase sirtuin-1 isoform a	1	1.39023	n/a	3.63396	n/a	3.4614	n/a
4506013	NP_002703.1	PPP1R7	protein phosphatase 1 regulatory subunit 7	2	1.02931	12.201	3.62517	n/a	3.43169	n/a
20127446	NP_002204.2	ITGB5	integrin beta-5 precursor	1	1.33985	n/a	3.60301	n/a	1.09162	n/a
55770842	NP_000558.2	CRP	C-reactive protein precursor	1	0.906283	12.8914	3.58562	7.27833	3.51129	2.65393
40217847	NP_054733.2	SNRNP200	U5 small nuclear ribonucleoprotein 200 kDa helicase	10	0.949951	5.223	3.5724	45.0063	3.07303	41.1446
10835067	NP_003133.1	SSB	lupus La protein	7	0.944014	6.74904	3.56782	21.8273	3.31082	29.5027
5803040	NP_006849.1	TMED1	transmembrane emp24 domain-containing protein 1 precursor	2	0.884835	n/a	3.56697	n/a	3.67002	n/a
67944630	NP_001020092.1	RPL9	60S ribosomal protein L9	8	1.06532	18.7698	3.55561	72.5068	4.06161	64.1465
21264369	NP_624357.1	NUP98	nuclear pore complex protein Nup98-Nup96 isoform 2	2	0.904515	74.9774	3.54722	n/a	3.79095	n/a
6912440	NP_036411.1	ZNF346	zinc finger protein 346	1	0.954648	132.958	3.53956	100.591	4.01511	195.276
411147393	NP_001258636.1	MKRN2	probable E3 ubiquitin-protein ligase makorin-2 isoform 2	2	0.816901	n/a	3.53627	n/a	3.54742	n/a
197333695	NP_001127949.1	PARN	poly(A)-specific ribonuclease PARN isoform 2	2	0.732251	79.0334	3.52017	25.7934	3.45812	24.7894
4758488	NP_004119.1	GTF2F2	general transcription factor IIF subunit 2	3	0.98766	8.10961	3.51112	5.04514	3.36817	1.13763
91208418	NP_001035095.1	TCERG1	transcription elongation regulator 1 isoform 2	4		n/a	3.48035	n/a	4.44917	n/a
4506743	NP_001003.1	RPS8	40S ribosomal protein S8	9	0.966556	9.58553	3.45753	91.099	3.17367	70.753
168229174	NP_061862.1	RBM27	RNA-binding protein 27	2	1.38785	n/a	3.4505	n/a	3.4229	n/a
148596949	NP_004732.2	NOLC1	nucleolar and coiled-body phosphoprotein 1	5	0.95717	5.32165	3.42387	46.3656	3.50251	42.1828
189458812	NP_000149.3	GBE1	1,4-alpha-glucan-branching enzyme	1	1.30729	n/a	3.41769	n/a	4.85657	n/a
394582099	NP_001257401.1	MCM3	DNA replication licensing factor MCM3 isoform 2	4	0.913404	34.9938	3.4153	48.9436	2.78651	51.6073
21361437	NP_055315.2	HTATSF1	HIV Tat-specific factor 1	1	0.925958	n/a	3.41198	n/a	3.4458	n/a
20127499	NP_006266.2	SRSF6	serine/arginine-rich splicing factor 6	1	0.985454	n/a	3.41091	n/a	3.38459	n/a
109948302	NP_055388.2	TMEM97	transmembrane protein 97	1	1.06802	n/a	3.36658	n/a	3.26665	n/a
33598968	NP_005349.3	LMO7	LIM domain only protein 7 isoform 1	5	0.965503	21.6898	3.34143	61.4191	2.43581	143.539
40254823	NP_005532.2	INPP5D	phosphatidylinositol 3,4,5-trisphosphate 5-phosphatase 1 isoform b	2	0.925861	17.9354	3.33444	286.164	3.23914	201.004
373938452	NP_001243331.1	ELOVL1	elongation of very long chain fatty acids protein 1 isoform 3	1	0.626078	n/a	3.33137	n/a	3.83149	n/a
223278381	NP_001138586.1	RRP12	RRP12-like protein isoform 2	2	0.986004	n/a	3.32041	n/a	3.27624	n/a
255918077	NP_001157569.1	VCAN	versican core protein isoform 3 precursor	3	0.880225	n/a	3.31538	174.797	3.21557	131.531
78000181	NP_003964.3	RPL14	60S ribosomal protein L14	2	0.883257	n/a	3.30724	n/a	3.10872	n/a
29789090	NP_061185.1	RCC2	protein RCC2	3	1.21636	1.8723	3.30113	38.0876	2.54938	19.7533
56699409	NP_002130.2	RBMX	RNA-binding motif protein, X chromosome isoform 1	6	1.05687	8.72804	3.30112	59.5708	3.30813	50.7082
7706339	NP_057143.1	PPIL1	peptidyl-prolyl cis-trans isomerase-like 1	1	0.792927	n/a	3.28806	n/a	2.86273	n/a
7706200	NP_057731.1	THEM6	protein THEM6 precursor	1	0.963894	n/a	3.28249	n/a	3.23711	n/a
194306567	NP_853556.2	RFC5	replication factor C subunit 5 isoform 2	2	2.70654	n/a	3.25881	n/a	3.02328	n/a
62198235	NP_001014436.1	DBNL	drebrin-like protein isoform b	1	0.927003	n/a	3.23204	n/a	3.65374	n/a
7657257	NP_055580.1	TOMM20	mitochondrial import receptor subunit TOM20 homolog	1	1.04171	n/a	3.23164	n/a	2.91818	n/a
108773799	NP_001035808.1	GDAP1	ganglioside-induced differentiation-associated protein 1 isoform b	1	0.776527	n/a	3.22559	n/a	2.8047	n/a
11055992	NP_067639.1	SCPEP1	retinoid-inducible serine carboxypeptidase precursor	2	0.887367	2.88844	3.20902	n/a	2.84959	n/a
34452173	NP_000878.2	ITGAX	integrin alpha-X precursor	1	0.774436	n/a	3.19029	n/a	3.17786	n/a
4507879	NP_003365.1	VDAC1	voltage-dependent anion-selective channel protein 1	6	0.886528	23.9546	3.17939	563.111	2.94374	802.816
122937227	NP_001073884.1	U2SURP	U2 snRNP-associated SURP motif-containing protein	1	0.677924	n/a	3.17442	n/a	2.55685	n/a
410171036	XP_003403927.3	LOC100653057	liver carboxylesterase 1-like	3	0.880666	3.30358	3.16843	56.6741	2.75992	27.8605
4506617	NP_000976.1	RPL17	60S ribosomal protein L17 isoform a	8	0.963726	9.50042	3.13788	197.563	2.65501	122.458
33469922	NP_877577.1	MCM7	DNA replication licensing factor MCM7 isoform 2	1	1.09396	n/a	3.12899	n/a	3.54967	n/a
103471995	NP_689759.2	SRFBP1	serum response factor-binding protein 1	2	0.389418	n/a	3.12714	n/a	3.17013	n/a
4557853	NP_000337.1	SOX9	transcription factor SOX-9	1	0.99208	n/a	3.127	n/a	2.80836	n/a
5803227	NP_006817.1	YWHAQ	14-3-3 protein theta	5	1.28719	35.8516	3.12519	297.806	3.60587	319.285
21361282	NP_005617.2	SRSF4	serine/arginine-rich splicing factor 4	3	1.02694	7.3805	3.12516	40.9462	3.17514	34.6047
41350320	NP_957516.1	MAGED2	melanoma-associated antigen D2	3	0.92856	5.80317	3.11488	42.588	3.31896	45.2435
354681995	NP_001238900.1	SPAG9	C-Jun-amino-terminal kinase-interacting protein 4 isoform 4	1	0.976943	n/a	3.08948	n/a	2.81943	n/a
38788260	NP_004450.3	BPTF	nucleosome-remodeling factor subunit BPTF isoform 2	1	0.991801	n/a	3.08283	n/a	3.30585	n/a
39725938	NP_008986.2	POLR3A	DNA-directed RNA polymerase III subunit RPC1	1	1.20915	n/a	3.05434	n/a	3.86719	n/a
13128992	NP_076943.1	C19orf43	uncharacterized protein C19orf43	3	0.943399	2.4015	3.04963	39.3008	3.01941	46.9135
13699859	NP_000952.1	PTGIS	prostacyclin synthase precursor	1	1.05288	n/a	3.04901	n/a	3.23768	n/a
5174425	NP_006043.1	DSCR3	Down syndrome critical region protein 3	1	0.847323	n/a	3.04578	n/a	1.37026	n/a
217035118	NP_060779.2	TBC1D23	TBC1 domain family member 23 isoform 2	1	0.97261	n/a	3.04126	n/a	2.90595	n/a
11225260	NP_003277.1	TOP1	DNA topoisomerase 1	7	0.894665	26.2007	3.04084	61.6171	3.1999	66.2523
120433590	NP_001073331.1	DBI	acyl-CoA-binding protein isoform 3	2	0.988843	8.53419	3.03469	n/a	3.88784	n/a
14165466	NP_114368.1	PTBP1	polypyrimidine tract-binding protein 1 isoform c	4	0.913706	n/a	3.02244	n/a	2.84288	n/a
62244004	NP_001013865.1	SLTM	SAFB-like transcription modulator isoform b	2	0.774919	42.4737	3.01852	65.5222	2.60422	39.9631
392583868	NP_001254793.1	SLIRP	SRA stem-loop-interacting RNA-binding protein, mitochondrial isoform 3 precursor	2	0.888832	7.84689	3.01247	44.7963	2.87653	64.3879
89886453	NP_065756.1	TBC1D24	TBC1 domain family member 24 isoform 2	1	0.979751	n/a	2.99003	n/a	2.65456	n/a
31563362	NP_852128.1	MRPL55	39S ribosomal protein L55, mitochondrial isoform a	1	0.55699	n/a	2.98233	n/a	2.86645	n/a
7706254	NP_057018.1	NOP58	nucleolar protein 58	8	0.851016	13.8079	2.97445	346.049	2.71203	230.58
52630322	NP_005843.2	CHD3	chromodomain-helicase-DNA-binding protein 3 isoform 2	1	0.832986	n/a	2.97024	n/a	2.40039	n/a
14141193	NP_001004.2	RPS9	40S ribosomal protein S9	2	1.01437	9.11541	2.9562	24.5087	2.91012	3.10523
39930469	NP_115570.1	RPF2	ribosome production factor 2 homolog	1	0.958092	n/a	2.95161	n/a	2.81898	n/a
4758796	NP_004138.1	DRG1	developmentally-regulated GTP-binding protein 1	3	1.38291	66.0515	2.93981	n/a	2.77996	n/a
153791300	NP_060585.2	SDAD1	protein SDA1 homolog	1	0.835837	n/a	2.93879	n/a	2.54562	n/a
49574532	NP_063937.2	GSK3A	glycogen synthase kinase-3 alpha	2	1.30656	n/a	2.93092	n/a	2.67152	n/a
4502363	NP_001179.1	BAK1	bcl-2 homologous antagonist/killer	2	1.13867	2.57544	2.91529	9438.4	3.46574	3012.73
56682953	NP_004438.3	EPS8	epidermal growth factor receptor kinase substrate 8	1	0.984093	n/a	2.90993	n/a	2.928	n/a
61744483	NP_001013269.1	SLC3A2	4F2 cell-surface antigen heavy chain isoform f	2	0.986904	n/a	2.90783	11.3323	3.80093	38.6131
28872765	NP_777360.1	PSMD12	26S proteasome non-ATPase regulatory subunit 12 isoform 2	2		n/a	2.88413	n/a	2.59565	n/a
88900507	NP_001034708.1	PRMT5	protein arginine N-methyltransferase 5 isoform b	2	1.41822	46.8471	2.87223	54.0897	1.74414	182.456
22902128	NP_690620.1	PTK7	inactive tyrosine-protein kinase 7 isoform c precursor	3	1.10182	n/a	2.85813	n/a	2.99065	n/a
7657597	NP_055126.1	SMUG1	single-strand selective monofunctional uracil DNA glycosylase isoform 1	1	1.2594	n/a	2.85624	n/a	2.80911	n/a
67782358	NP_001701.2	CFB	complement factor B preproprotein	8	0.959393	13.5559	2.85189	41.6593	2.64075	45.9187
33469917	NP_877423.1	MCM4	DNA replication licensing factor MCM4	2	1.1051	n/a	2.85117	n/a	3.15467	n/a
29171736	NP_003702.2	PPAP2A	lipid phosphate phosphohydrolase 1 isoform 1	1	0.545778	n/a	2.84933	n/a	2.1026	n/a
334724463	NP_002813.3	TWF1	twinfilin-1 isoform 2	2	0.971887	13.1802	2.84464	0.3066	2.88134	0.593734
16117787	NP_000986.2	RPL34	60S ribosomal protein L34	5	0.995954	5.18591	2.84436	36.5412	3.09536	40.377
375493565	NP_001243631.1	USP3	ubiquitin carboxyl-terminal hydrolase 3 isoform 2	1	0.982752	n/a	2.83706	n/a	2.77472	n/a
24497451	NP_009103.2	NUP50	nuclear pore complex protein Nup50 isoform b	3	1.51159	51.1831	2.82745	107.783	3.24772	108.949
189458885	NP_001121613.1	DPEP1	dipeptidase 1 precursor	4	1.48452	77.3476	2.82697	316.942	3.38614	163.276
11968047	NP_071935.1	POLR1E	DNA-directed RNA polymerase I subunit RPA49	1	1.15275	n/a	2.82523	n/a	2.60567	n/a
28460688	NP_787048.1	TXLNA	alpha-taxilin	5	0.936416	37.1899	2.80546	36.034	2.34438	67.1762
19923345	NP_006038.2	RBM12	RNA-binding protein 12	1	1.27235	n/a	2.79573	n/a	2.67892	n/a
192447438	NP_000304.2	PROS1	vitamin K-dependent protein S preproprotein	2	1.05046	3.65302	2.79267	6.58207	2.82024	2.84298
29568103	NP_003080.2	SNRNP70	U1 small nuclear ribonucleoprotein 70 kDa	5	1.01932	6.01316	2.78036	52.0274	2.85274	62.2314
55956788	NP_005372.2	NCL	nucleolin	15	0.950729	25.3745	2.78033	176.636	2.52481	163.702
5031815	NP_005539.1	KARS	lysine--tRNA ligase isoform 2	7	1.11794	4.37033	2.77583	170.168	2.7931	20.9451
95147335	NP_002214.2	ITPR2	inositol 1,4,5-trisphosphate receptor type 2	1	0.97215	n/a	2.77275	n/a	2.7676	n/a
4826998	NP_005057.1	SFPQ	splicing factor, proline- and glutamine-rich	4	0.972994	14.3783	2.77208	116.626	2.55475	114.967
18375676	NP_542166.1	UPF2	regulator of nonsense transcripts 2	3	0.822919	6.78918	2.76814	n/a	2.70585	n/a
110618253	NP_005026.3	POLRMT	DNA-directed RNA polymerase, mitochondrial precursor	1	1.17426	n/a	2.76712	n/a	2.79229	n/a
6005757	NP_009123.1	SUPT16H	FACT complex subunit SPT16	7	0.97899	15.7493	2.7582	30.2742	2.7722	23.4706
6005719	NP_009107.1	C14orf1	probable ergosterol biosynthetic protein 28	1	0.785803	n/a	2.75762	n/a	2.40423	n/a
4506491	NP_002907.1	RFC4	replication factor C subunit 4	1	1.00272	n/a	2.73977	n/a	2.39231	n/a
22748653	NP_689498.1	ARRDC1	arrestin domain-containing protein 1	1	0.989171	n/a	2.73621	n/a	2.63339	n/a
4826643	NP_005130.1	ANXA3	annexin A3	2	1.0289	17.7411	2.73415	0.581954	3.00671	22.5454
19557702	NP_006744.2	SURF6	surfeit locus protein 6	2	1.0368	n/a	2.73124	n/a	2.89619	n/a
13375901	NP_078929.1	PRKRIP1	PRKR-interacting protein 1	1	1.12709	n/a	2.72907	n/a	2.61236	n/a
332801090	NP_001193929.1	HNRNPDL	heterogeneous nuclear ribonucleoprotein D-like isoform b	1	0.752543	n/a	2.72006	n/a	2.23528	n/a
8923398	NP_060286.1	LYAR	cell growth-regulating nucleolar protein	2	0.947918	10.2493	2.70484	16.786	3.04505	13.2446
5901896	NP_008817.1	ATP5E	ATP synthase subunit epsilon, mitochondrial	1	0.904936	n/a	2.69741	n/a	2.81217	n/a
63055059	NP_001017995.1	SH3PXD2B	SH3 and PX domain-containing protein 2B	1	0.963755	n/a	2.68959	n/a	2.74531	n/a
295842492	NP_001171511.1	STX3	syntaxin-3 isoform 2	4	0.880564	19.5494	2.68819	146.493	2.77118	143.255
109891938	NP_001035951.1	DLGAP4	disks large-associated protein 4 isoform c	1	1.88394	n/a	2.68118	n/a	1.87035	n/a
46276863	NP_002815.3	PTMS	parathymosin	3	1.00601	10.6635	2.67644	17.8814	2.72925	21.9602
316660086	NP_001186886.1	NDUFB5	NADH dehydrogenase [ubiquinone] 1 beta subcomplex subunit 5, mitochondrial isoform 2	1	0.91849	n/a	2.67098	n/a	2.44553	n/a
17149828	NP_476516.1	NAA15	N-alpha-acetyltransferase 15, NatA auxiliary subunit	4	1.08878	11.9774	2.67045	40.5339	2.68064	44.7495
192807336	NP_001122326.1	SRRT	serrate RNA effector molecule homolog isoform e	7	1.07883	5.09866	2.66893	7.86008	2.66403	10.762
13435375	NP_077808.1	GMEB1	glucocorticoid modulatory element-binding protein 1 isoform 2	1	0.950981	n/a	2.65913	n/a	2.20583	n/a
4506407	NP_002873.1	RANBP1	ran-specific GTPase-activating protein	3	0.824436	10.8502	2.65763	110.736	2.62227	116.155
4502111	NP_001147.1	ANXA7	annexin A7 isoform 1	4	0.881077	31.8954	2.64809	57.6934	2.32981	53.6028
169881252	NP_001509.3	GTF2I	general transcription factor II-I isoform 4	12	1.0354	17.6227	2.64546	33.6868	2.5424	38.5346
221316723	NP_078938.2	NAT10	N-acetyltransferase 10 isoform a	3	0.962986	n/a	2.64232	n/a	2.62994	n/a
332205939	NP_001193765.1	RAB11A	ras-related protein Rab-11A isoform 2	5	0.871384	15.6172	2.62716	2.91004	2.76042	18.8916
93102364	NP_055870.2	SWAP70	switch-associated protein 70	2	2.65154	n/a	2.62414	n/a	2.471	n/a
115647957	NP_071766.2	TOR3A	torsin-3A precursor	1	3.52743	n/a	2.61279	n/a	2.32188	n/a
30410716	NP_839955.1	EXOC1	exocyst complex component 1 isoform 2	2	1.29916	n/a	2.60768	n/a	2.2691	n/a
23111018	NP_690595.1	RBM10	RNA-binding protein 10 isoform 2	3	0.929609	8.70186	2.59955	15.9956	2.54476	6.30022
134152708	NP_060481.3	ARGLU1	arginine and glutamate-rich protein 1	2	1.01478	0.465898	2.5923	8.67529	2.52832	11.2232
7662086	NP_055599.1	ARHGEF11	rho guanine nucleotide exchange factor 11 isoform 1	1	1.1255	n/a	2.59203	n/a	2.49823	n/a
62422563	NP_001014835.1	PAK4	serine/threonine-protein kinase PAK 4 isoform 2	2	0.730554	n/a	2.58901	n/a	2.58489	n/a
387912535	NP_001248761.1	ASH2L	set1/Ash2 histone methyltransferase complex subunit ASH2 isoform c	1	1.01945	n/a	2.58262	n/a	2.65975	n/a
508772599	NP_001265338.1	ANXA11	annexin A11 isoform 2	5	1.02059	27.4108	2.57755	202.87	2.19112	104.454
4506753	NP_003698.1	RUVBL1	ruvB-like 1	4	1.15305	31.1616	2.5756	98.6854	2.16987	116.634
38679946	NP_065737.2	ABAT	4-aminobutyrate aminotransferase, mitochondrial precursor	1	0.888514	n/a	2.56916	n/a	2.06271	n/a
13569843	NP_057251.2	NOL7	nucleolar protein 7	1	0.950915	n/a	2.55946	n/a	2.33025	n/a
31712030	NP_853553.1	AUP1	ancient ubiquitous protein 1	2	0.769191	4.9087	2.55939	n/a	2.79437	n/a
13518026	NP_004978.2	LIMS1	LIM and senescent cell antigen-like-containing domain protein 1 isoform b	2	0.985148	n/a	2.55818	n/a	3.00572	n/a
359806892	NP_001240830.1	MEST	mesoderm-specific transcript homolog protein isoform d precursor	1	1.10436	n/a	2.55307	n/a	2.2416	n/a
21361497	NP_054768.2	ACAD9	acyl-CoA dehydrogenase family member 9, mitochondrial	3	1.54174	42.1885	2.54512	27.3946	2.96677	20.578
21264575	NP_624361.1	ARID1A	AT-rich interactive domain-containing protein 1A isoform b	2	1.0278	17.3581	2.54319	102.737	2.55589	97.4516
197333809	NP_056170.2	SUZ12	polycomb protein SUZ12	1	0.912497	n/a	2.53877	n/a	2.38654	n/a
242117893	NP_620119.2	BAX	apoptosis regulator BAX isoform sigma	6	1.05424	11.8067	2.53194	28.8473	2.53329	24.89
153090189	NP_001093216.1	SYBU	syntabulin isoform d	1	0.716563	n/a	2.53122	n/a	2.49871	n/a
111955162	NP_001009811.2	AZI1	5-azacytidine-induced protein 1 isoform b	1	0.771327	n/a	2.53055	n/a	2.47674	n/a
4502511	NP_001728.1	C9	complement component C9 precursor	7	1.08302	26.1394	2.52776	176.945	1.67064	113.933
14165435	NP_112552.1	HNRNPK	heterogeneous nuclear ribonucleoprotein K isoform b	13	0.966308	6.93802	2.52594	299.592	2.52379	330.99
238908505	NP_001154180.1	POLR3B	DNA-directed RNA polymerase III subunit RPC2 isoform 2	1	0.903299	n/a	2.52567	n/a	2.60726	n/a
4505893	NP_002659.1	PLP2	proteolipid protein 2	1	0.760798	n/a	2.51903	n/a	2.04107	n/a
149158690	NP_542417.2	PRRC2A	protein PRRC2A	1	1.0247	n/a	2.51794	n/a	2.59978	n/a
212276078	NP_001131022.1	LRRFIP1	leucine-rich repeat flightless-interacting protein 1 isoform 1	1	0.694913	n/a	2.51747	n/a	3.23966	n/a
164420681	NP_055958.2	METAP1	methionine aminopeptidase 1	2	0.961482	17.9249	2.50316	240.559	2.37602	235.971
295424842	NP_001171313.1	SRPR	signal recognition particle receptor subunit alpha isoform 2	2	1.20581	n/a	2.49133	n/a	2.92676	n/a
39995084	NP_075391.3	INTS3	integrator complex subunit 3	1	0.980159	n/a	2.48808	n/a	2.07675	n/a
226491502	NP_078954.4	NARS2	probable asparagine--tRNA ligase, mitochondrial isoform 1 precursor	1	0.683191	n/a	2.48032	n/a	2.191	n/a
5454064	NP_006319.1	RBM14	RNA-binding protein 14 isoform 1	4	0.880187	8.12308	2.48031	28.378	2.42289	23.3362
21464101	NP_036611.2	YWHAG	14-3-3 protein gamma	3	0.781319	0.985455	2.47826	52.4466	3.14637	21.8275
121114302	NP_001073341.1	CUL4B	cullin-4B isoform 2	4	0.991559	4.04898	2.47528	8.53126	2.49683	1.5011
170016077	NP_065143.2	ATP13A1	probable cation-transporting ATPase 13A1	5	1.10067	0.204683	2.4719	42.8911	3.1024	32.511
5174731	NP_005990.1	TSNAX	translin-associated protein X	2	0.898116	n/a	2.46641	n/a	2.21839	n/a
56181387	NP_005852.2	STUB1	E3 ubiquitin-protein ligase CHIP	3	0.98692	43.8844	2.46255	8.02382	2.54042	29.5075
8922479	NP_060590.1	ARMC1	armadillo repeat-containing protein 1	1	2.48005	n/a	2.46156	n/a	1.23171	n/a
5803036	NP_006796.1	HNRNPA0	heterogeneous nuclear ribonucleoprotein A0	4	0.97088	6.3533	2.46027	60.6363	2.37432	68.9148
384475554	NP_001244970.1	HARS	histidine--tRNA ligase, cytoplasmic isoform 3	7	1.01267	4.7641	2.44192	91.449	2.21463	107.739
21361376	NP_009096.2	SF3A2	splicing factor 3A subunit 2	2	0.913859	3.90822	2.43994	47.4677	2.42945	47.5521
55769533	NP_002574.2	PAWR	PRKC apoptosis WT1 regulator protein	1	1.04298	n/a	2.43932	n/a	2.68953	n/a
150421684	NP_056020.2	ATP11A	probable phospholipid-transporting ATPase IH isoform a	1		n/a	2.43909	n/a	1.14227	n/a
55749804	NP_079172.2	ERMP1	endoplasmic reticulum metallopeptidase 1	7	0.919218	14.4342	2.43714	28.2324	2.47428	58.2468
45007002	NP_982288.1	CERS6	ceramide synthase 6 isoform 2	2	1.05765	16.4124	2.4357	n/a	2.72215	n/a
45827771	NP_055144.3	EDC4	enhancer of mRNA-decapping protein 4	2	0.637456	37.6117	2.43093	145.936	1.79442	121.39
282165706	NP_001164101.1	TJP2	tight junction protein ZO-2 isoform 6	2	1.03868	n/a	2.42681	n/a	2.3066	n/a
4506687	NP_001009.1	RPS15	40S ribosomal protein S15	2	1.0188	11.3018	2.42132	14.2888	2.37958	5.24813
6912292	NP_036249.1	CBX5	chromobox protein homolog 5	2	0.848624	3.85288	2.41813	1.45812	2.58158	19.5369
304434704	NP_001182085.1	ZMYM6NB	uncharacterized protein ZMYM6NB precursor	1	2.22107	n/a	2.41758	n/a	4.57935	n/a
39932583	NP_060440.2	NRDE2	protein NRDE2 homolog	1	1.19274	n/a	2.41226	n/a	2.50136	n/a
4758138	NP_004387.1	DDX5	probable ATP-dependent RNA helicase DDX5	5	0.893686	10.4338	2.41084	38.113	2.13464	37.0276
14150015	NP_115675.1	DCUN1D5	DCN1-like protein 5	2	0.99695	2.03866	2.41029	44.0081	2.54052	51.0251
14249614	NP_116261.1	SYTL1	synaptotagmin-like protein 1 isoform 2	2	0.86182	14.4138	2.40994	53.8144	2.27324	54.0968
4759270	NP_004613.1	TSN	translin isoform 1	6	1.06423	29.4883	2.40861	14.5844	2.11389	7.90223
149944496	NP_056377.1	UBXN7	UBX domain-containing protein 7	1	0.974889	n/a	2.40843	n/a	2.38998	n/a
256419001	NP_001157855.1	STAU2	double-stranded RNA-binding protein Staufen homolog 2 isoform d	3	0.927775	6.13636	2.40778	1.56498	1.98958	17.3966
224593278	NP_060365.7	DDX27	probable ATP-dependent RNA helicase DDX27	4	0.90459	31.289	2.40647	79.8152	2.30837	89.8913
4506633	NP_000984.1	RPL31	60S ribosomal protein L31 isoform 1	4	0.775186	15.6367	2.39875	137.541	2.06074	132.954
151301053	NP_444271.2	RBM33	RNA-binding protein 33	1		n/a	2.39071	n/a	4.46011	n/a
42544159	NP_006635.2	HSPH1	heat shock protein 105 kDa	5	0.923952	7.73207	2.39009	84.6087	2.43131	73.6358
7657013	NP_036270.1	AATF	protein AATF	1	1.33579	n/a	2.38943	n/a	2.06839	n/a
33457308	NP_872353.2	TMED4	transmembrane emp24 domain-containing protein 4 precursor	3	0.991122	7.73828	2.38585	71.3076	3.97006	18.8487
109240550	NP_001035879.1	PSPC1	paraspeckle component 1	1	0.987949	n/a	2.38045	n/a	2.65886	n/a
7661936	NP_055464.1	SAFB2	scaffold attachment factor B2	1	1.02813	n/a	2.37928	n/a	2.26161	n/a
4758018	NP_004359.1	CNN2	calponin-2 isoform a	1	1.05255	n/a	2.37749	n/a	2.33444	n/a
347300410	NP_001231496.1	BID	BH3-interacting domain death agonist isoform 2	1	1.38591	n/a	2.37479	n/a	1.2204	n/a
58761500	NP_037473.3	OLA1	obg-like ATPase 1 isoform 1	4	0.844588	16.097	2.36936	38.6983	2.02005	41.9916
224586804	NP_059139.3	POLE3	DNA polymerase epsilon subunit 3	1	0.949399	n/a	2.3644	n/a	2.31483	n/a
29501813	NP_005650.2	UFD1L	ubiquitin fusion degradation protein 1 homolog isoform A	1		n/a	2.3628	n/a	5.05502	n/a
4758356	NP_004102.1	FEN1	flap endonuclease 1	2	1.31166	53.782	2.36115	204.065	2.2605	194.088
15431306	NP_150644.1	RPL8	60S ribosomal protein L8	4	0.969269	6.78516	2.36092	149.049	1.70419	321.001
384381471	NP_001244945.1	FDXR	NADPH:adrenodoxin oxidoreductase, mitochondrial isoform 7	4	0.863775	2.4863	2.35745	36.9642	2.52206	43.2817
148234741	NP_001091085.1	GPR89C	putative Golgi pH regulator C	2	1.46417	n/a	2.35692	n/a	2.38684	n/a
24475816	NP_612510.1	TECR	very-long-chain enoyl-CoA reductase	1	1.01572	1.00816	2.35036	4.41851	2.13352	4.5142
16554611	NP_112570.2	MRPS15	28S ribosomal protein S15, mitochondrial	3	1.03326	8.28251	2.35015	69.3559	2.39648	41.0556
40548422	NP_054888.2	CHMP4A	charged multivesicular body protein 4a	5	0.96897	8.7885	2.34724	29.3746	2.27757	38.1762
116812600	NP_006636.2	STARD10	PCTP-like protein	2	1.03093	4.5727	2.34467	177360	2.54055	81467.9
55769552	NP_001713.2	POLR3D	DNA-directed RNA polymerase III subunit RPC4	1	1.91246	n/a	2.34152	n/a	4.40089	n/a
13129078	NP_076988.1	ASPSCR1	tether containing UBX domain for GLUT4 isoform 1	1	0.945116	27.9646	2.33527	14.426	2.41046	14.0125
4506609	NP_000972.1	RPL19	60S ribosomal protein L19	4	0.883431	24.1471	2.33053	51.8952	2.32739	60.3028
384367993	NP_001244935.1	COPS4	COP9 signalosome complex subunit 4 isoform 2	3	0.972313	n/a	2.33022	n/a	2.17637	n/a
5803221	NP_006775.1	WDR3	WD repeat-containing protein 3	1	1.04325	9.54616	2.32837	35.955	2.37893	40.991
34932414	NP_031389.3	NONO	non-POU domain-containing octamer-binding protein isoform 1	13	0.910163	9.41639	2.3264	122.1	2.76726	85.6682
26051237	NP_059122.2	NUP54	nucleoporin p54	2	1.05808	n/a	2.32132	n/a	2.12409	n/a
30578410	NP_849193.1	STT3B	dolichyl-diphosphooligosaccharide--protein glycosyltransferase subunit STT3B	2	0.88058	n/a	2.31951	n/a	2.28235	n/a
269847750	NP_001161396.1	CMSS1	protein CMSS1 isoform 2	3	0.877013	17.3735	2.31838	5.37971	2.23244	28.9716
7657441	NP_055706.1	PDAP1	28 kDa heat- and acid-stable phosphoprotein	7	1.01699	6.09512	2.30975	30.9786	1.966	77.8132
13569848	NP_112162.1	TBRG4	protein TBRG4 isoform 2	6	0.976413	13.5522	2.30167	485.614	2.05809	327.536
149944548	NP_055990.1	NBEAL2	neurobeachin-like protein 2	1	1.01948	n/a	2.29949	n/a	2.45503	n/a
72534716	NP_001026883.1	MCUR1	mitochondrial calcium uniporter regulator 1	1	0.759072	n/a	2.2951	n/a	2.60781	n/a
4504035	NP_003866.1	GMPS	GMP synthase [glutamine-hydrolyzing]	2	0.656878	58.9335	2.28121	39.7381	2.00724	44.4283
24233517	NP_710154.1	IKBIP	inhibitor of nuclear factor kappa-B kinase-interacting protein isoform 1	2	0.928401	n/a	2.2793	n/a	2.40398	n/a
10835073	NP_066565.1	NMT1	glycylpeptide N-tetradecanoyltransferase 1	3	0.968445	10.9644	2.27862	268.665	1.975	294.306
23618848	NP_291020.1	SYS1	protein SYS1 homolog isoform a	1	0.884042	n/a	2.26255	n/a	2.24846	n/a
223718097	NP_005006.3	OXA1L	mitochondrial inner membrane protein OXA1L	1	1.05558	n/a	2.26068	n/a	2.4139	n/a
27544927	NP_644809.1	ORMDL3	ORM1-like protein 3	1	0.939658	n/a	2.25534	n/a	2.03758	n/a
457866840	NP_001263994.1	MFF	mitochondrial fission factor isoform e	1	1.06777	n/a	2.25149	n/a	2.54032	n/a
222144293	NP_002255.3	KPNA1	importin subunit alpha-1	1	0.917868	n/a	2.25142	n/a	2.09501	n/a
18105007	NP_004332.2	CAD	CAD protein	7	0.899005	9.52111	2.24816	93.9095	2.05111	85.666
4504809	NP_002220.1	JUNB	transcription factor jun-B	1	0.859728	n/a	2.24608	n/a	0.869501	n/a
194394237	NP_009058.2	VIL1	villin-1	18	0.954757	9.1756	2.24072	72.3502	2.3107	79.3161
122937345	NP_001073936.1	MYO5B	unconventional myosin-Vb	2	1.59235	71.4897	2.23707	64.3059	1.35738	32.6252
89886477	NP_037535.2	STRN4	striatin-4 isoform 1	2	1.00136	n/a	2.23192	n/a	2.25762	n/a
150418007	NP_006258.3	RANBP2	E3 SUMO-protein ligase RanBP2	7	1.06824	5.04327	2.23154	65.648	1.88258	81.4516
195927059	NP_004646.3	AXIN2	axin-2	1	1.34476	n/a	2.22806	n/a	1.86769	n/a
38261962	NP_060649.3	ATF7IP	activating transcription factor 7-interacting protein 1	1	0.859543	n/a	2.22241	n/a	2.27379	n/a
51317376	NP_001003796.1	NHP2L1	NHP2-like protein 1	1	1.42148	77.4769	2.22008	142.435	1.93528	121.457
146219843	NP_006653.2	SRCAP	helicase SRCAP	1	1.63532	n/a	2.21483	n/a	1.79493	n/a
47578107	NP_056199.2	NIPBL	nipped-B-like protein isoform B	2	1.06423	n/a	2.2142	n/a	2.36768	n/a
4507903	NP_003375.1	VRK1	serine/threonine-protein kinase VRK1	2	0.86652	n/a	2.21208	n/a	1.34402	n/a
239049591	NP_001155059.1	GYS1	glycogen [starch] synthase, muscle isoform 2	1	0.772729	n/a	2.21197	n/a	0.762967	n/a
238859597	NP_055829.2	RBM34	RNA-binding protein 34 isoform 1	2	0.853161	n/a	2.19643	111.911	3.10275	26.2896
288915527	NP_001165886.1	BAG1	BAG family molecular chaperone regulator 1 isoform BAG-1S	2	1.01066	n/a	2.19619	n/a	1.99382	n/a
60279268	NP_001012496.1	U2AF2	splicing factor U2AF 65 kDa subunit isoform b	3	0.921725	7.41964	2.19347	86.971	2.34793	65.1057
55749531	NP_006833.2	SF3B2	splicing factor 3B subunit 2	4	0.997779	4.02003	2.19231	57.0721	2.23806	66.2456
20070130	NP_001198.2	BTF3	transcription factor BTF3 isoform B	3	0.988822	2.16495	2.187	24.1093	2.11672	27.41
215599015	NP_001135935.1	DKC1	H/ACA ribonucleoprotein complex subunit 4 isoform 2	5	0.940365	5.13222	2.18233	8.66739	2.08571	15.909
16950603	NP_068593.2	MRPS35	28S ribosomal protein S35, mitochondrial isoform 1 precursor	2	0.87926	3.29342	2.18221	1.09511	1.99343	6.93564
40018640	NP_078805.3	CDC73	parafibromin	3	0.938206	8.15019	2.1804	70.4198	2.07593	17.47
30410728	NP_835369.1	FUT8	alpha-(1,6)-fucosyltransferase isoform a	1	0.970577	n/a	2.16812	n/a	1.98342	n/a
11067749	NP_031397.1	BRD3	bromodomain-containing protein 3	2	1.00427	22.8637	2.1678	33.6112	1.79303	65.2984
58082085	NP_001010853.1	PM20D2	peptidase M20 domain-containing protein 2	1	0.993813	n/a	2.15857	n/a	4.40837	n/a
83281438	NP_003749.2	EIF3J	eukaryotic translation initiation factor 3 subunit J	4	0.819311	29.0756	2.1554	4.00746	1.97506	47.8502
294997306	NP_001171114.1	DAG1	dystroglycan preproprotein	5	0.883591	n/a	2.1497	n/a	2.22965	n/a
62243332	NP_003541.2	MAD1L1	mitotic spindle assembly checkpoint protein MAD1	2	0.945376	n/a	2.14421	n/a	1.86945	n/a
208022641	NP_003189.2	TCEB3	transcription elongation factor B polypeptide 3	3	0.977026	212.228	2.14305	273.812	2.71862	450.888
344179120	NP_001184252.1	HIRIP3	HIRA-interacting protein 3 isoform 2	1	1.21951	n/a	2.13734	n/a	2.14655	n/a
38788319	NP_005266.2	GNL1	guanine nucleotide-binding protein-like 1	2	1.07949	n/a	2.13228	n/a	2.06398	n/a
4506623	NP_000979.1	RPL27	60S ribosomal protein L27	1	1.02067	17.9499	2.12039	12.1966	2.12562	21.5648
32455266	NP_859048.1	PRDX1	peroxiredoxin-1	7	0.987878	10.0258	2.11942	76.4772	2.12941	119.143
157694492	NP_055335.2	MYBBP1A	myb-binding protein 1A isoform 2	2	0.400035	n/a	2.10061	n/a	2.51078	n/a
56549668	NP_689854.2	ARID2	AT-rich interactive domain-containing protein 2	1	0.850331	n/a	2.09656	n/a	2.28066	n/a
4505587	NP_002564.1	PAFAH1B3	platelet-activating factor acetylhydrolase IB subunit gamma	3	0.971587	14.6524	2.09291	18.2612	1.91629	6.88283
358356407	NP_001240313.1	RPL15	60S ribosomal protein L15 isoform 2	1	0.930076	n/a	2.08471	n/a	2.09352	n/a
5454158	NP_006286.1	VARS	valine--tRNA ligase	3	0.971183	12.3074	2.08144	n/a	2.04092	n/a
5031633	NP_005757.1	FARP1	FERM, RhoGEF and pleckstrin domain-containing protein 1 isoform 1	2	1.78532	n/a	2.08023	n/a	2.71113	n/a
14670392	NP_115784.1	BAZ1B	tyrosine-protein kinase BAZ1B	3	0.989959	n/a	2.07897	n/a	2.04331	n/a
94536854	NP_079093.2	THSD4	thrombospondin type-1 domain-containing protein 4 precursor	1	1.19744	n/a	2.0783	n/a	1.90793	n/a
30026034	NP_835361.1	SLC35B2	adenosine 3'-phospho 5'-phosphosulfate transporter 1 precursor	3	0.944512	9.91906	2.07766	75.0054	2.0691	113.558
47132622	NP_002442.2	MTAP	S-methyl-5'-thioadenosine phosphorylase	1	0.962626	3.15692	2.07754	1.1249	2.06568	0.399034
61835172	NP_001013457.1	FXR1	fragile X mental retardation syndrome-related protein 1 isoform c	2	1.23348	n/a	2.07665	n/a	1.59799	n/a
118150660	NP_060941.2	ZC3H15	zinc finger CCCH domain-containing protein 15	5	0.951197	14.1888	2.07336	21.7207	2.4864	22.8023
11067747	NP_001244.1	CDC5L	cell division cycle 5-like protein	1	0.960249	n/a	2.07288	n/a	2.22676	n/a
194097365	NP_060117.3	FTSJ3	pre-rRNA processing protein FTSJ3	2	0.916804	n/a	2.07052	n/a	2.26937	n/a
31652264	NP_071401.3	RBM26	RNA-binding protein 26	1	0.94622	n/a	2.06934	n/a	2.12392	n/a
221136939	NP_056444.3	PRPF31	U4/U6 small nuclear ribonucleoprotein Prp31	1	1.18962	n/a	2.0678	n/a	2.06546	n/a
316983124	NP_066357.2	RPL36A	60S ribosomal protein L36a isoform a	4	1.06184	19.8362	2.0638	26.8084	1.6161	22.0214
224586884	NP_001138898.1	YBX3	Y-box-binding protein 3 isoform b	1	0.87036	n/a	2.05936	n/a	1.7812	n/a
367460087	NP_005955.3	MYH10	myosin-10 isoform 2	11	1.05391	11.4227	2.05738	55.4008	1.98463	64.4431
157502201	NP_005836.2	ABCC4	multidrug resistance-associated protein 4 isoform 1	1		n/a	2.05618	n/a	3.62826	n/a
119395760	NP_001073280.1	DIAPH1	protein diaphanous homolog 1 isoform 2	2	1.2344	n/a	2.05382	n/a	2.7914	n/a
18860916	NP_036387.2	XRN2	5'-3' exoribonuclease 2	4	1.08388	16.6275	2.05138	57.5416	2.05898	61.1609
21040314	NP_115571.1	SON	protein SON isoform B	4	0.936202	7.53264	2.05066	29.4171	1.88615	82.2614
110349772	NP_000079.2	COL1A1	collagen alpha-1(I) chain preproprotein	4	0.989376	7.99197	2.04948	6.6062	1.79314	27.4814
5453844	NP_006464.1	TAF6L	TAF6-like RNA polymerase II p300/CBP-associated factor-associated factor 65 kDa subunit 6L	1	0.924392	n/a	2.04815	n/a	1.61754	n/a
4507521	NP_001055.1	TKT	transketolase isoform 1	19	0.961781	11.8377	2.04201	772.842	1.98002	728.568
153946395	NP_002151.2	TNC	tenascin precursor	4	0.763932	10.6556	2.03995	19.4636	1.75046	32.2273
4759156	NP_004587.1	SNRPA	U1 small nuclear ribonucleoprotein A	4	0.997045	5.5191	2.03671	137.346	1.9299	61.1197
28827795	NP_789782.1	CHMP4B	charged multivesicular body protein 4b	7	0.968462	9.36221	2.03565	39.1368	2.02702	19.6417
5032007	NP_005850.1	PURA	transcriptional activator protein Pur-alpha	2	0.952227	2.70368	2.03458	70.7586	1.94042	65.0733
84043963	NP_056988.3	EIF5B	eukaryotic translation initiation factor 5B	11	0.974825	12.9164	2.03362	81.1072	1.94347	69.1628
156766047	NP_001096618.1	GIGYF2	PERQ amino acid-rich with GYF domain-containing protein 2 isoform c	3	1.4856	25.4537	2.03274	68.2876	3.14785	11.7619
380503846	NP_001098677.2	LAMA4	laminin subunit alpha-4 isoform 2 precursor	2	0.889934	n/a	2.02981	n/a	1.85	n/a
37537722	NP_079034.3	AGMAT	agmatinase, mitochondrial precursor	1	0.808097	n/a	2.02926	n/a	1.99404	n/a
148747209	NP_057475.2	NOP16	nucleolar protein 16 isoform 3	1	1.67129	n/a	2.0291	n/a	2.34839	n/a
7019503	NP_037520.1	PREB	prolactin regulatory element-binding protein	1	1.0722	n/a	2.02191	n/a	1.81066	n/a
87159816	NP_001034455.1	ATP6V1E1	V-type proton ATPase subunit E 1 isoform b	3	1.18846	49.4226	2.01903	90.9507	1.255	10.2473
57164975	NP_000347.2	TCOF1	treacle protein isoform b	7	1.00989	17.2495	2.01786	35.646	1.8582	38.4209
46367787	NP_002559.2	PABPC1	polyadenylate-binding protein 1	4	0.968097	8.35666	2.01698	102.104	1.82906	77.1317
41393547	NP_056993.2	NBAS	neuroblastoma-amplified sequence	2	0.875752	16.3944	2.01689	n/a	1.31219	37.3577
33188463	NP_872578.1	MRPS9	28S ribosomal protein S9, mitochondrial	2	1.30257	41.0563	2.01594	63.0952	2.12094	69.8754
96974985	NP_060191.3	CC2D1A	coiled-coil and C2 domain-containing protein 1A	6	0.933866	6.39464	2.00611	132.127	1.40525	102.718
157694511	NP_056473.2	NOC2L	nucleolar complex protein 2 homolog	3	0.890876	6.70002	2.00574	71.3958	1.70923	90.8374
4506701	NP_001016.1	RPS23	40S ribosomal protein S23	6	0.838868	11.6037	2.00264	82.8776	1.85301	59.18
195539356	NP_001124197.1	PSMB5	proteasome subunit beta type-5 isoform 2	1	0.986028	n/a	2.00244	n/a	1.96042	n/a
7706423	NP_057283.1	LSM7	U6 snRNA-associated Sm-like protein LSm7	1	0.897755	n/a	2.00099	n/a	1.60711	n/a
8923936	NP_060937.1	USE1	vesicle transport protein USE1	1	0.451821	n/a	1.99777	n/a	1.01012	n/a
112382252	NP_842565.2	SPTBN1	spectrin beta chain, non-erythrocytic 1 isoform 2	1	0.970615	n/a	1.99646	n/a	1.98115	n/a
66346681	NP_001018078.1	SERBP1	plasminogen activator inhibitor 1 RNA-binding protein isoform 2	14	0.935512	19.1449	1.99114	72.1313	1.97998	68.1108
4503841	NP_001460.1	XRCC6	X-ray repair cross-complementing protein 6	13	0.883913	22.9851	1.99019	120.555	1.76493	76.9254
54860105	NP_060524.4	ARHGAP17	rho GTPase-activating protein 17 isoform 2	2	1.06616	62.8047	1.9867	n/a	1.52733	10.4698
8922563	NP_060633.1	DNAJC17	dnaJ homolog subfamily C member 17	1	1.20327	n/a	1.98616	n/a	1.99704	n/a
124494254	NP_006182.2	PA2G4	proliferation-associated protein 2G4	11	0.936949	3.76122	1.98595	94.0476	1.77505	73.3366
38201710	NP_006377.2	DDX17	probable ATP-dependent RNA helicase DDX17 isoform 1	6	0.878171	11.3522	1.98321	40.2231	1.88802	52.9558
40556376	NP_115958.2	GLYR1	putative oxidoreductase GLYR1	1	1.02141	n/a	1.98259	n/a	1.82643	n/a
40254986	NP_115679.2	HSDL2	hydroxysteroid dehydrogenase-like protein 2 isoform 1	7	0.917929	6.7626	1.98087	291.742	2.16963	432.236
377520143	NP_001243692.1	FAM49B	protein FAM49B	3	0.843501	9.35911	1.97764	62.859	1.94169	65.0231
127139033	NP_000932.3	POR	NADPH--cytochrome P450 reductase	3	0.953991	13.3337	1.97646	15.7441	1.85032	10.6629
151101404	NP_002814.3	PTMA	prothymosin alpha isoform 2	4	0.929174	3.38054	1.97299	8.46451	1.934	11.5209
209413730	NP_001129241.1	PVR	poliovirus receptor isoform gamma precursor	1	1.00641	n/a	1.96568	n/a	1.53769	n/a
4885649	NP_005490.1	UBA2	SUMO-activating enzyme subunit 2	3	0.972057	7.44427	1.96243	120.315	1.94795	119.636
54112117	NP_036565.2	SF3B1	splicing factor 3B subunit 1 isoform 1	9	0.850525	22.74	1.96104	137.135	2.0694	84.8298
13027602	NP_076424.1	DDRGK1	DDRGK domain-containing protein 1 precursor	1	0.936811	n/a	1.95688	n/a	1.84134	n/a
4758412	NP_004472.1	GALNT2	polypeptide N-acetylgalactosaminyltransferase 2 precursor	1	1.048	n/a	1.95533	n/a	1.94431	n/a
10337595	NP_066283.1	PPM1A	protein phosphatase 1A isoform 1	2	1.13132	n/a	1.95336	n/a	1.88933	n/a
394025672	NP_001257356.1	PSMD5	26S proteasome non-ATPase regulatory subunit 5 isoform 2	3	1.14895	93.7043	1.95119	91.8518	2.69246	49.071
4506619	NP_000977.1	RPL24	60S ribosomal protein L24	7	0.950417	20.5841	1.94684	178.603	2.02035	119.89
4758516	NP_004485.1	HDGF	hepatoma-derived growth factor isoform a	6	0.926527	4.15201	1.94194	195.03	1.87566	173.19
4506567	NP_003790.1	RNMT	mRNA cap guanine-N7 methyltransferase	3	1.24531	n/a	1.94115	n/a	1.71409	n/a
32483377	NP_054817.2	PRDX3	thioredoxin-dependent peroxide reductase, mitochondrial isoform b	4	1.41241	75.429	1.94061	15.613	1.75799	11.8883
7656952	NP_055227.1	CACYBP	calcyclin-binding protein isoform 1	6	0.935963	1.68358	1.93939	71.0596	1.8415	69.2267
19526773	NP_071933.2	ATG3	ubiquitin-like-conjugating enzyme ATG3	1	0.984492	n/a	1.93651	n/a	2.0154	n/a
19923969	NP_612451.1	CCDC124	coiled-coil domain-containing protein 124	3	0.960135	4.51988	1.93588	5.47916	2.02146	5.82887
118498359	NP_056474.2	RSL1D1	ribosomal L1 domain-containing protein 1	6	0.776626	6.12732	1.93473	76.007	1.7736	34.6517
503774357	NP_001265139.1	NUP153	nuclear pore complex protein Nup153 isoform 3	1		n/a	1.93302	n/a	1.43724	n/a
239582772	NP_078796.2	C2orf47	uncharacterized protein C2orf47, mitochondrial precursor	2	0.936569	n/a	1.92645	n/a	1.95028	n/a
22035653	NP_663612.1	APOL2	apolipoprotein L2	3	0.929743	5.28544	1.92624	10.7964	2.07053	7.38341
5031703	NP_005745.1	G3BP1	ras GTPase-activating protein-binding protein 1	5	0.835912	2.97623	1.92601	70.203	1.90911	66.7816
153792539	NP_055189.2	REPIN1	replication initiator 1 isoform 1	1	0.874596	n/a	1.92568	n/a	1.71173	n/a
14249670	NP_116290.1	COX14	cytochrome c oxidase assembly protein COX14	1	1.08516	n/a	1.92444	n/a	1.72845	n/a
13443000	NP_036302.1	FBXO22	F-box only protein 22 isoform b	1	1.10877	n/a	1.92436	n/a	1.6898	n/a
257470975	NP_001158146.1	SUMF1	sulfatase-modifying factor 1 isoform 2 precursor	1	1.98048	n/a	1.92335	n/a	1.62315	n/a
126032350	NP_001075109.1	PRKDC	DNA-dependent protein kinase catalytic subunit isoform 2	28	0.96009	19.2286	1.92007	133.149	1.9617	118.902
14249158	NP_116020.1	HDGFRP2	hepatoma-derived growth factor-related protein 2 isoform 2	2	0.937444	4.22507	1.91528	22.2958	1.92142	22.7931
108796653	NP_001035830.1	PGP	phosphoglycolate phosphatase	2	1.02301	27.4816	1.91233	3.76698	1.88702	3.62227
297374764	NP_001172003.1	ZCCHC6	terminal uridylyltransferase 7 isoform 2	1	1.03892	n/a	1.91098	n/a	2.30943	n/a
47132595	NP_998776.1	SLC25A3	phosphate carrier protein, mitochondrial isoform b precursor	5	1.04812	13.5802	1.9081	77.3313	1.68978	73.1239
153945715	NP_061198.2	MYO5C	unconventional myosin-Vc	1	1.09552	n/a	1.90691	n/a	1.70218	n/a
224177528	NP_001138904.1	SMIM20	small integral membrane protein 20	1	0.761363	15.6266	1.90028	22.7951	1.8433	18.3492
84798622	NP_005899.3	MANBA	beta-mannosidase precursor	2	0.942889	n/a	1.89941	n/a	1.99393	n/a
53829376	NP_001005476.1	PKP4	plakophilin-4 isoform b	1	1.03335	n/a	1.89924	n/a	1.53265	n/a
209863011	NP_001129407.1	POSTN	periostin isoform 3 precursor	1	0.897412	n/a	1.8958	n/a	2.02249	n/a
217035154	NP_443094.3	RCSD1	capZ-interacting protein	1	1.18636	n/a	1.89555	n/a	2.26284	n/a
34734066	NP_006477.2	FBLN1	fibulin-1 isoform D precursor	5	1.14378	16.9625	1.89441	13.7714	1.70277	13.1099
7262378	NP_004205.2	FIBP	acidic fibroblast growth factor intracellular-binding protein isoform b	1	0.958076	n/a	1.87336	n/a	1.66883	n/a
56118310	NP_073568.2	NUCKS1	nuclear ubiquitous casein and cyclin-dependent kinase substrate 1	1	0.956934	n/a	1.86775	n/a	1.80628	n/a
30581135	NP_006297.2	SMC1A	structural maintenance of chromosomes protein 1A	13	1.00833	18.6649	1.86451	122.08	1.84692	55.4584
38683816	NP_942592.1	ANKRD17	ankyrin repeat domain-containing protein 17 isoform b	3	1.12547	34.8348	1.8642	2.25853	1.63153	26.7492
5174613	NP_005960.1	NAP1L4	nucleosome assembly protein 1-like 4	1	0.791004	n/a	1.86181	n/a	1.69156	n/a
101943240	NP_001511.2	GTF3C1	general transcription factor 3C polypeptide 1	1	1.12769	n/a	1.8591	n/a	2.40657	n/a
56117850	NP_009089.4	CSDE1	cold shock domain-containing protein E1 isoform 2	1	1.07473	n/a	1.85404	n/a	1.55474	n/a
7662078	NP_055454.1	TTC37	tetratricopeptide repeat protein 37	2	1.92552	n/a	1.84982	n/a	2.03664	n/a
8922712	NP_060713.1	2014-09-11	septin-11	4	1.02298	10.6984	1.84747	79.5481	1.84521	85.0696
188497683	NP_078898.3	FASTKD1	FAST kinase domain-containing protein 1	1	1.42015	n/a	1.84558	n/a	2.75437	n/a
66346693	NP_005236.2	FAT1	protocadherin Fat 1 precursor	1	0.282318	n/a	1.84527	n/a	1.85412	n/a
112789530	NP_001036216.1	STAG2	cohesin subunit SA-2 isoform b	2	0.709737	n/a	1.84433	n/a	1.72036	n/a
187960109	NP_060547.2	RBM28	RNA-binding protein 28 isoform 1	4	1.05404	9.9667	1.84234	61.75	2.34591	21.3332
223029424	NP_060855.2	LSG1	large subunit GTPase 1 homolog	2	1.40416	34.3862	1.8415	n/a	2.21205	n/a
153792633	NP_056381.1	FAM169A	soluble lamin-associated protein of 75 kDa	1	0.711751	n/a	1.84098	n/a	0.906742	n/a
395132450	NP_001257420.1	RPL13A	60S ribosomal protein L13a isoform 2	5	0.991314	10.0052	1.83864	51.6212	2.22102	40.3922
5031987	NP_005720.1	PPIF	peptidyl-prolyl cis-trans isomerase F, mitochondrial precursor	3	0.862947	7.97504	1.83743	89.652	2.00416	71.8771
21361659	NP_060555.2	IPO9	importin-9	1	0.941384	n/a	1.83688	n/a	1.82792	n/a
238859541	NP_001154976.1	ALDH4A1	delta-1-pyrroline-5-carboxylate dehydrogenase, mitochondrial isoform b	3	0.973404	90.06	1.83655	210.841	5.45213	191.934
50053795	NP_001408.2	EIF4B	eukaryotic translation initiation factor 4B	5	0.941143	20.023	1.8312	94.9713	1.68571	102.519
41393614	NP_958842.1	RAB5C	ras-related protein Rab-5C isoform a	2	1.00778	5.83191	1.82567	11.4015	1.82952	4.41296
33359221	NP_079150.3	KIAA0319L	dyslexia-associated protein KIAA0319-like protein	1	1.07113	n/a	1.82544	n/a	1.90631	n/a
16418361	NP_443091.1	RFT1	protein RFT1 homolog	1	0.972374	n/a	1.81746	n/a	1.5419	n/a
38492356	NP_006582.1	POLD3	DNA polymerase delta subunit 3	1	1.12656	n/a	1.81038	n/a	1.79118	n/a
27477136	NP_064504.2	ZC3HAV1	zinc finger CCCH-type antiviral protein 1 isoform 1	3	0.694579	46.6745	1.80699	14.6482	1.59776	4.61267
4503247	NP_003674.1	RRP1	ribosomal RNA processing protein 1 homolog A	2	0.952434	8.18957	1.80479	105.524	1.70067	99.4116
308199423	NP_001184044.1	GCLC	glutamate--cysteine ligase catalytic subunit isoform b	2	0.956062	n/a	1.80186	n/a	1.53737	n/a
57242755	NP_055759.3	CLSTN1	calsyntenin-1 isoform 2 precursor	2	0.758059	37.6422	1.80064	75.329	1.74507	80.5425
57863275	NP_056118.2	VPS8	vacuolar protein sorting-associated protein 8 homolog isoform b	2	0.799654	43.4277	1.80051	n/a	1.85644	n/a
4507791	NP_003960.1	UBE2M	NEDD8-conjugating enzyme Ubc12	2	0.888699	12.5957	1.79064	39.9457	1.65918	52.164
514239920	NP_001265473.1	C8B	complement component C8 beta chain isoform 3	1	0.881363	9.20949	1.78817	16.3017	2.84244	165.501
115298682	NP_055987.2	PRRC2C	protein PRRC2C	1	0.962361	8.85837	1.78681	17.8171	1.74634	0.815667
18490987	NP_057267.2	MRTO4	mRNA turnover protein 4 homolog	1	0.902931	n/a	1.78608	n/a	1.69665	n/a
338753358	NP_001229707.1	IKBKB	inhibitor of nuclear factor kappa-B kinase subunit beta isoform 5	1	0.779203	n/a	1.78552	n/a	1.83188	n/a
9966805	NP_065147.1	DDX24	ATP-dependent RNA helicase DDX24	5	0.916287	3.91793	1.78501	61.9517	1.40542	15.621
4505573	NP_003890.1	ARHGEF7	rho guanine nucleotide exchange factor 7 isoform a	2	0.973453	1.12702	1.78488	46.0181	2.05974	35.8702
14591909	NP_000960.2	RPL5	60S ribosomal protein L5	4	0.942217	8.18074	1.78452	1.28852	1.58135	16.4552
12056465	NP_001427.2	FBL	rRNA 2'-O-methyltransferase fibrillarin	3	0.976624	6.71415	1.78153	190.244	1.82319	181.203
54234024	NP_056104.2	VPS39	vam6/Vps39-like protein	1	1.39465	n/a	1.7784	n/a		n/a
109809741	NP_057732.2	LARP7	la-related protein 7 isoform 1	4	1.01286	18.147	1.77717	26.9936	1.44367	23.859
163965364	NP_001106673.1	NACA	nascent polypeptide-associated complex subunit alpha isoform b	8	0.991593	3.03738	1.77664	60.0099	2.34822	23.9085
7657667	NP_055050.1	UBL4A	ubiquitin-like protein 4A	1		n/a	1.77528	n/a	1.00848	n/a
4501993	NP_003650.1	AGPS	alkyldihydroxyacetonephosphate synthase, peroxisomal precursor	3	0.942207	6.09609	1.7726	34.4218	1.6256	2.11869
21703352	NP_072094.1	PNKD	probable hydrolase PNKD isoform 2	2	1.19865	0.254247	1.76814	301.377	1.48153	129.129
5032179	NP_005753.1	TRIM28	transcription intermediary factor 1-beta	13	0.956708	15.5323	1.76765	108.619	1.53798	96.9128
50511936	NP_067674.2	FCGR2A	low affinity immunoglobulin gamma Fc region receptor II-a isoform 2 precursor	1	1.11172	n/a	1.76692	n/a	1.62243	n/a
24797106	NP_055428.1	FAF2	FAS-associated factor 2	1	0.411044	n/a	1.76624	n/a	1.40803	n/a
34452721	NP_002031.2	GABPA	GA-binding protein alpha chain	1	0.944306	n/a	1.76126	n/a	2.00753	n/a
5453555	NP_006316.1	RAN	GTP-binding nuclear protein Ran	5	0.922167	10.4461	1.75768	42.7643	1.68324	64.9177
4557759	NP_000241.1	MPO	myeloperoxidase precursor	4	1.01862	8.18365	1.7575	51.4114	3.23027	137.817
56549113	NP_057300.2	DBR1	lariat debranching enzyme	1	0.991671	n/a	1.75109	n/a	1.62865	n/a
23510448	NP_006730.2	MCM5	DNA replication licensing factor MCM5	3	1.01386	0.226241	1.74897	207.334	2.12454	297.948
45439327	NP_002696.3	PPL	periplakin	3	1.13061	43.0511	1.74859	1243.13	1.62643	267.228
42544123	NP_973727.1	SF1	splicing factor 1 isoform 3	2	0.964498	n/a	1.74765	n/a	2.10262	n/a
40255009	NP_598003.2	SLC30A7	zinc transporter 7	1	0.984111	11.4992	1.7461	8.10619	1.74867	11.2755
4507125	NP_003082.1	SNRPB	small nuclear ribonucleoprotein-associated proteins B and B' isoform B	1	1.23629	n/a	1.74169	n/a	2.35514	n/a
258613943	NP_001158222.1	ASPH	aspartyl/asparaginyl beta-hydroxylase isoform f	6	1.00201	10.2709	1.73642	7.79607	1.61827	15.2456
4826690	NP_004932.1	DHX8	ATP-dependent RNA helicase DHX8	1	0.798102	n/a	1.73397	n/a	1.23823	n/a
118918397	NP_055738.3	FNDC3A	fibronectin type-III domain-containing protein 3A isoform 2	3	1.31237	27.9401	1.73271	169.477	1.79225	345.61
10716563	NP_001737.1	CANX	calnexin precursor	8	0.963661	11.9832	1.72885	117.782	1.51303	54.5425
149363656	NP_056004.1	EXOC6B	exocyst complex component 6B	2	0.51592	3.91286	1.7272	56.7487	1.37756	30.9893
38327039	NP_002145.3	HSPA4	heat shock 70 kDa protein 4	10	0.970728	8.02165	1.72424	63.6281	1.61262	70.7451
190014586	NP_066967.3	PSIP1	PC4 and SFRS1-interacting protein isoform 1	3	0.955107	0.417215	1.72312	7.07567	1.6994	8.32904
11641289	NP_071761.1	TFB2M	dimethyladenosine transferase 2, mitochondrial	1		n/a	1.72292	n/a	4.48013	n/a
23308577	NP_006614.2	PHGDH	D-3-phosphoglycerate dehydrogenase	9	0.989691	16.5234	1.72233	50.7712	1.41098	100.124
62953129	NP_005873.2	MAEA	macrophage erythroblast attacher isoform 2	1	0.521565	n/a	1.72105	n/a	1.58035	n/a
119395750	NP_006112.3	KRT1	keratin, type II cytoskeletal 1	8	0.877858	11.7144	1.71874	40.2976	1.59403	61.2638
7657138	NP_055313.1	GOLIM4	Golgi integral membrane protein 4	6	0.953216	10.9422	1.71691	37.407	1.69602	5.327
54112121	NP_036558.3	SF3B3	splicing factor 3B subunit 3	10	0.942489	11.3787	1.712	53.5714	1.61136	23.92
93352551	NP_060764.3	CWF19L1	CWF19-like protein 1	1	3.70245	n/a	1.71021	n/a	4.00451	n/a
18426971	NP_550440.1	DGUOK	deoxyguanosine kinase, mitochondrial isoform b precursor	1	0.867331	n/a	1.7095	n/a	1.70774	n/a
5901970	NP_008826.1	HNMT	histamine N-methyltransferase isoform 1	2	0.972367	3.98994	1.70765	58.0628	1.50562	48.4904
62750354	NP_954659.1	MATR3	matrin-3 isoform a	7	1.05933	19.5151	1.70628	22.662	1.64017	58.4847
4506723	NP_000997.1	RPS3A	40S ribosomal protein S3a isoform 1	12	0.965412	4.28333	1.70602	305.316	1.86964	218.53
347446678	NP_001231514.1	LUC7L2	putative RNA-binding protein Luc7-like 2 isoform 3	3	0.760494	4.28371	1.69966	41.9213	1.44087	7.96441
24432106	NP_066997.3	KIAA1967	DBIRD complex subunit KIAA1967	3	0.902092	2.38851	1.69113	38.7652	1.79603	26.1774
52485606	NP_443137.2	FMNL2	formin-like protein 2	3	0.92894	18.1105	1.69067	67.2165	1.84318	55.6909
7661910	NP_055488.1	EMC2	ER membrane protein complex subunit 2	1	1.0945	n/a	1.68885	n/a	1.5604	n/a
89276756	NP_003904.3	PRPF4B	serine/threonine-protein kinase PRP4 homolog	1	1.05215	n/a	1.68808	n/a	1.61681	n/a
55769546	NP_060376.2	PAK1IP1	p21-activated protein kinase-interacting protein 1	1	1.11871	n/a	1.68804	n/a	1.49164	n/a
66932988	NP_001019387.1	FBLIM1	filamin-binding LIM protein 1 isoform c	1	3.0889	n/a	1.68648	n/a	0.803415	n/a
51477708	NP_001003810.1	HNRNPD	heterogeneous nuclear ribonucleoprotein D0 isoform d	6	0.961978	11.2871	1.68573	34.881	1.68033	36.5648
5031767	NP_005517.1	HSF1	heat shock factor protein 1	1	1.12363	n/a	1.6857	n/a	1.63031	n/a
117168248	NP_057479.2	PTPLAD1	very-long-chain (3R)-3-hydroxyacyl-[acyl-carrier protein] dehydratase 3	4	0.653014	24.4053	1.68551	134.823	1.17592	587.09
116875831	NP_057117.2	RMDN1	regulator of microtubule dynamics protein 1	1	1.16397	n/a	1.68527	n/a	1.35748	n/a
259906020	NP_001158287.1	ACIN1	apoptotic chromatin condensation inducer in the nucleus isoform 3	5	0.907563	95.6281	1.6829	175.273	1.08985	176.633
5031863	NP_005558.1	LGALS3BP	galectin-3-binding protein precursor	6	0.895181	14.3214	1.682	219.496	1.64684	159.288
21264355	NP_003070.3	SMARCE1	SWI/SNF-related matrix-associated actin-dependent regulator of chromatin subfamily E member 1	1	1.20362	n/a	1.6792	n/a	1.59118	n/a
148763345	NP_277071.2	CDK11A	cyclin-dependent kinase 11A isoform 4	4	0.885723	9.59541	1.67247	50.9714	1.72625	67.8491
193211614	NP_001123237.1	NSDHL	sterol-4-alpha-carboxylate 3-dehydrogenase, decarboxylating	2	1.01743	n/a	1.67211	n/a	1.54359	n/a
40317624	NP_954646.1	MRRF	ribosome-recycling factor, mitochondrial isoform 2 precursor	3	0.936657	13.186	1.67132	5.9385	1.38537	27.0391
109689718	NP_001035937.1	ABHD12	monoacylglycerol lipase ABHD12 isoform a	1	0.97327	n/a	1.67109	n/a	1.69786	n/a
4506473	NP_002899.1	REL	proto-oncogene c-Rel	2	0.919842	n/a	1.66846	n/a	1.49315	n/a
33946282	NP_056311.2	KIAA1429	protein virilizer homolog isoform 1	2	0.713578	90.9966	1.66745	n/a	0.666852	274.691
133908631	NP_620710.2	SMARCD1	SWI/SNF-related matrix-associated actin-dependent regulator of chromatin subfamily D member 1 isoform b	3	0.942019	n/a	1.66695	n/a	1.80627	n/a
41872631	NP_004095.4	FASN	fatty acid synthase	14	1.13406	23.7027	1.66647	83.8804	1.55013	81.8938
117938251	NP_001070908.1	BCLAF1	bcl-2-associated transcription factor 1 isoform 2	2	1.02244	n/a	1.65755	n/a	1.83344	n/a
112293277	NP_055095.2	DNAJC8	dnaJ homolog subfamily C member 8	3	0.930485	0.762937	1.65652	25.8885	1.55341	5.85932
22748643	NP_689497.1	CHMP4C	charged multivesicular body protein 4c	1	0.79755	n/a	1.65334	n/a	1.63222	n/a
73747881	NP_055928.3	ZZEF1	zinc finger ZZ-type and EF-hand domain-containing protein 1	4	1.32426	70.777	1.65266	n/a	2.76909	n/a
87159832	NP_001441.4	FHL2	four and a half LIM domains protein 2	2	0.695493	67.2763	1.65214	43.2213	3.58789	77.565
219842214	NP_001137358.1	PPP1R12A	protein phosphatase 1 regulatory subunit 12A isoform b	3	0.943691	10.7809	1.64834	27.9233	1.58748	26.5414
428977040	NP_001258798.1	SZRD1	SUZ domain-containing protein 1 isoform 3	1	1.10469	n/a	1.64359	n/a	1.36916	n/a
56550081	NP_001007794.1	BUB3	mitotic checkpoint protein BUB3 isoform b	2	1.68977	83.7293	1.64249	145.11	1.67314	180.818
225703037	NP_001139554.1	MBOAT7	lysophospholipid acyltransferase 7 isoform 3	1	1.17142	n/a	1.64188	n/a	1.48768	n/a
171543879	NP_001116370.1	CD99	CD99 antigen isoform b precursor	2	1.19343	35.9685	1.64112	72.8507	1.56739	57.4326
28416956	NP_783161.1	GIMAP8	GTPase IMAP family member 8	1	1.05459	n/a	1.64021	n/a	1.92389	n/a
42734503	NP_976240.1	CAPRIN1	caprin-1 isoform 2	6	0.864772	15.8481	1.63793	44.4851	1.55363	28.4884
156151417	NP_001095872.1	PCTP	phosphatidylcholine transfer protein isoform 2	1	0.894142	n/a	1.6377	n/a	1.54277	n/a
50658065	NP_005487.3	SMC4	structural maintenance of chromosomes protein 4	3	0.969599	5.17066	1.63665	2.03184	1.5909	6.86601
19913369	NP_006444.2	TBL3	transducin beta-like protein 3	2	1.13532	n/a	1.63259	n/a	1.6726	n/a
259013553	NP_001158508.1	OGDH	2-oxoglutarate dehydrogenase, mitochondrial isoform 3 precursor	4	0.98683	7.32628	1.63177	34.1932	1.4634	4.65901
44680114	NP_982257.1	PSMG1	proteasome assembly chaperone 1 isoform b	3	0.874992	19.9465	1.63159	47.84	1.87174	21.5135
163310725	NP_079467.3	EDEM3	ER degradation-enhancing alpha-mannosidase-like protein 3 precursor	1	1.36236	n/a	1.63005	n/a	3.4748	n/a
91176333	NP_859056.2	LYRM7	complex III assembly factor LYRM7	1	1.21096	n/a	1.62838	n/a	1.39922	n/a
509155837	NP_001265241.1	NUP155	nuclear pore complex protein Nup155 isoform 3	1	1.0024	n/a	1.62043	n/a	1.90296	n/a
41281885	NP_037519.2	UQCR10	cytochrome b-c1 complex subunit 9 isoform a	2	0.973572	n/a	1.61934	n/a	1.70101	n/a
333440449	NP_055912.2	CLASP2	CLIP-associating protein 2 isoform 1	3	1.00088	10.4378	1.61895	98.2148	2.44297	34.7783
264681410	NP_001161086.1	LEMD3	inner nuclear membrane protein Man1 isoform 2	2	1.0606	n/a	1.61728	n/a	1.74161	n/a
148728164	NP_006401.3	HTATIP2	oxidoreductase HTATIP2 isoform b	3	1.21414	3.79698	1.61689	25.9683	1.55214	17.6297
269847422	NP_001161375.1	MFSD1	major facilitator superfamily domain-containing protein 1 isoform 2	1	0.537892	n/a	1.61315	n/a	1.57547	n/a
314122181	NP_001186602.1	CALU	calumenin isoform e precursor	1	1.01772	n/a	1.61168	n/a	1.50813	n/a
4505641	NP_002583.1	PCNA	proliferating cell nuclear antigen	2	0.876069	4.93736	1.61082	39.653	1.70751	24.1493
371872799	NP_001243094.1	TMCO1	transmembrane and coiled-coil domain-containing protein 1 isoform c	1	1.15882	n/a	1.61012	n/a	1.50509	n/a
13899342	NP_113669.1	SLC25A18	mitochondrial glutamate carrier 2	1	0.986405	n/a	1.60811	n/a	2.29852	n/a
503774159	NP_001265128.1	SNX2	sorting nexin-2 isoform 2	7	1.03053	18.3863	1.60781	107.51	1.34649	92.3261
290543591	NP_001166299.1	YTHDF2	YTH domain family protein 2 isoform 2	1	0.922176	n/a	1.60561	n/a	1.6278	n/a
27597090	NP_003161.2	SUPT6H	transcription elongation factor SPT6	2	0.88224	19.7003	1.6055	93.3495	3.39468	30.326
32698876	NP_872329.1	CMC1	COX assembly mitochondrial protein homolog	2	0.918799	2.01387	1.60447	20.8371	1.54252	40.0543
33356547	NP_004517.2	MCM2	DNA replication licensing factor MCM2	3	0.804324	1.42824	1.60318	16.3552	3.45645	35.4169
221307584	NP_001138303.1	PHB2	prohibitin-2 isoform 1	8	0.912256	13.4204	1.60008	52.3804	1.55951	48.0629
194440732	NP_665878.2	GSTZ1	maleylacetoacetate isomerase isoform 2	1	0.985122	n/a	1.59977	n/a	1.57488	n/a
91208426	NP_006436.3	PRPF8	pre-mRNA-processing-splicing factor 8	6	0.995844	3.90612	1.59727	65.1971	1.69065	54.1039
29788755	NP_112224.1	SBF2	myotubularin-related protein 13	1	1.02654	n/a	1.59575	n/a	1.86637	n/a
31377697	NP_078932.2	COLGALT1	procollagen galactosyltransferase 1 precursor	2	0.94246	n/a	1.59282	n/a	1.80646	n/a
34577083	NP_689937.2	RSU1	ras suppressor protein 1 isoform 2	3	0.86834	5.50764	1.59215	52.2721	1.41626	35.0132
20336239	NP_612568.1	PPP1R8	nuclear inhibitor of protein phosphatase 1 isoform beta/delta	2	1.47149	62.1343	1.59035	326.479	1.63805	462.038
224831243	NP_056375.2	OPA1	dynamin-like 120 kDa protein, mitochondrial isoform 1	5	0.990441	31.6322	1.58955	43.7283	1.52942	75.7366
31044432	NP_851853.1	LEMD2	LEM domain-containing protein 2 isoform 1	2	0.782042	n/a	1.58499	n/a	1.3298	n/a
4506725	NP_000998.1	RPS4X	40S ribosomal protein S4, X isoform X isoform	7	0.970511	7.51148	1.5848	136.403	1.66235	160.551
221136781	NP_060549.4	SRBD1	S1 RNA-binding domain-containing protein 1	3	1.27269	20.9232	1.58236	39.5043	1.58083	72.8093
55743138	NP_001006945.1	RPS6KA4	ribosomal protein S6 kinase alpha-4 isoform b	1	0.900499	n/a	1.58136	n/a	1.99857	n/a
14916483	NP_001217.2	CASP6	caspase-6 isoform alpha preproprotein	1	1.79179	39.0989	1.58128	26.039	1.5365	112.866
117553580	NP_003929.4	AP3D1	AP-3 complex subunit delta-1 isoform 2	1	1.02287	12.2209	1.58002	3.5256	1.54779	9.83451
4885281	NP_005262.1	GLUD1	glutamate dehydrogenase 1, mitochondrial precursor	9	1.0307	27.6542	1.57991	186.587	2.02882	52.2963
55749769	NP_065994.1	CWC22	pre-mRNA-splicing factor CWC22 homolog	1	0.866892	n/a	1.57832	n/a	1.39966	n/a
39777604	NP_945328.1	ARHGEF1	rho guanine nucleotide exchange factor 1 isoform 3	2	1.15034	36.3561	1.57662	259.016	2.26791	23.8633
154146216	NP_067636.1	PLEKHA2	pleckstrin homology domain-containing family A member 2	1	1.09737	n/a	1.5733	n/a	1.48426	n/a
56676371	NP_037423.2	CPSF1	cleavage and polyadenylation specificity factor subunit 1	4	1.01616	9.19681	1.57172	50.4644	1.93611	17.0465
162417971	NP_055567.2	SPCS2	signal peptidase complex subunit 2	2	1.07817	61.9148	1.57136	n/a	0.580592	399.683
4757768	NP_004300.1	ARHGDIA	rho GDP-dissociation inhibitor 1 isoform a	2	0.989132	n/a	1.5701	n/a	1.3741	n/a
38176151	NP_085153.1	KIAA1715	protein lunapark	4	0.93541	17.614	1.56773	12.5159	1.50648	9.33055
295789085	NP_001171434.1	MNAT1	CDK-activating kinase assembly factor MAT1 isoform 2	1	0.710983	n/a	1.56739	n/a	1.68291	n/a
167614504	NP_002282.2	LAMB1	laminin subunit beta-1 precursor	6	0.945964	16.6028	1.56656	23.647	1.5511	71.8927
327478416	NP_001192184.1	OCLN	occludin isoform b precursor	1	0.920437	n/a	1.56617	n/a	1.65701	n/a
92087055	NP_072096.2	GIGYF1	PERQ amino acid-rich with GYF domain-containing protein 1	1	2.37267	n/a	1.56546	n/a	2.62043	n/a
238624149	NP_001154836.1	NPTN	neuroplastin isoform d precursor	1	0.942996	n/a	1.56282	n/a	1.46214	n/a
13376216	NP_079097.1	CCDC134	coiled-coil domain-containing protein 134 precursor	1	1.07442	n/a	1.56238	n/a	1.52956	n/a
510025472	NP_001186257.2	FPGT	fucose-1-phosphate guanylyltransferase isoform 3	1	1.16531	n/a	1.55628	n/a	1.75898	n/a
27477134	NP_079199.2	NUP210	nuclear pore membrane glycoprotein 210 precursor	3	0.995206	11.1432	1.55623	361.335	1.47339	426.3
209915588	NP_001129609.1	RPL28	60S ribosomal protein L28 isoform 5	4	0.991437	10.5828	1.55611	82.4678	1.58165	104.435
4758988	NP_004152.1	RAB1A	ras-related protein Rab-1A isoform 1	4	1.13762	28.047	1.55461	112.188	1.2035	42.979
74272287	NP_004985.2	MMP9	matrix metalloproteinase-9 preproprotein	1	1.2084	n/a	1.55129	n/a	1.68748	n/a
33620730	NP_005543.2	KLC1	kinesin light chain 1 isoform 1	6	0.914653	7.57608	1.55127	79.5442	1.1962	62.9186
21040371	NP_005795.2	DDX39A	ATP-dependent RNA helicase DDX39A	1	0.768175	n/a	1.55013	n/a	1.10792	n/a
410172404	XP_003960489.1	WASH1	uncharacterized protein LOC100287171	1	0.484231	n/a	1.54835	n/a	1.95071	n/a
312596881	NP_001186092.1	PSMC5	26S protease regulatory subunit 8 isoform 2	4	1.1488	24.8341	1.54676	9.07664	1.65258	3.947
14702180	NP_114381.1	EIF4H	eukaryotic translation initiation factor 4H isoform 2	3	0.956049	5.92383	1.54649	175.513	1.51881	161.357
4505753	NP_002620.1	PGAM1	phosphoglycerate mutase 1	2	0.956291	6.28532	1.54529	3.55203	1.62574	10.7301
20070205	NP_005549.2	LAD1	ladinin-1	4	1.14394	36.856	1.54187	162.172	1.88246	101.753
47419930	NP_001888.2	CSPG4	chondroitin sulfate proteoglycan 4 precursor	2	0.552041	198.364	1.54094	n/a	0.491408	186.493
422398845	NP_001258710.1	PSMD6	26S proteasome non-ATPase regulatory subunit 6 isoform 4	1	0.860961	n/a	1.54028	n/a	1.51205	n/a
145309311	NP_001034680.2	USP9X	probable ubiquitin carboxyl-terminal hydrolase FAF-X isoform 4	6	0.885261	11.8613	1.53981	63.3907	1.28151	43.3311
117553608	NP_008910.2	SLC39A7	zinc transporter SLC39A7 precursor	1	1.05513	n/a	1.53916	n/a	1.3185	n/a
321400114	NP_001189474.1	CUX1	protein CASP isoform f	2	0.897757	41.5934	1.53673	n/a	1.2686	20.9481
228008333	NP_149094.3	RHPN2	rhophilin-2	1	1.28707	n/a	1.53602	n/a	1.99464	n/a
157168362	NP_000261.2	PNP	purine nucleoside phosphorylase	2	0.895795	n/a	1.53556	n/a	1.41705	n/a
171906582	NP_064583.2	CCDC47	coiled-coil domain-containing protein 47 precursor	3	0.967469	6.95862	1.53324	69.1808	1.50845	72.4877
39725934	NP_002606.3	SERPINF1	pigment epithelium-derived factor precursor	5	0.901611	7.37443	1.53136	639.228	0.875927	2235.34
255652944	NP_000262.2	NPC1	Niemann-Pick C1 protein precursor	1	1.97091	n/a	1.53099	n/a	1.53046	n/a
6005768	NP_009216.1	GABARAPL2	gamma-aminobutyric acid receptor-associated protein-like 2	1	0.495371	n/a	1.52889	n/a	2.09283	n/a
86788015	NP_001034437.1	EFEMP1	EGF-containing fibulin-like extracellular matrix protein 1 precursor	3	0.956569	11.0789	1.52555	226.849	1.36401	50.7625
5453880	NP_006296.1	ANP32A	acidic leucine-rich nuclear phosphoprotein 32 family member A	5	0.929962	6.14231	1.52127	23.6553	1.57904	56.2587
24308179	NP_061174.1	CTTNBP2NL	CTTNBP2 N-terminal-like protein	2	1.04044	18.833	1.52112	35.6798	1.32742	21.4049
41872583	NP_004841.2	ROCK2	rho-associated protein kinase 2	12	1.03833	8.84729	1.51885	126.758	2.00113	119.571
151301228	NP_060362.3	PRPF40A	pre-mRNA-processing factor 40 homolog A	4	0.875335	8.08056	1.51616	412.281	1.30122	269.922
4503249	NP_003463.1	DEK	protein DEK isoform 1	4	0.958013	7.30858	1.51463	55.0207	1.40953	117.786
55770856	NP_001007025.1	GOSR1	Golgi SNAP receptor complex member 1 isoform 3	1	1.14098	n/a	1.51426	n/a	1.80101	n/a
4507509	NP_003245.1	TIMP1	metalloproteinase inhibitor 1 precursor	2	0.912308	5.23146	1.51353	131.25	1.58809	84.9252
361050332	NP_001241655.1	AP4S1	AP-4 complex subunit sigma-1 isoform 3	1	1.41565	n/a	1.51342	n/a	2.4468	n/a
221219026	NP_001138231.1	PHLDB1	pleckstrin homology-like domain family B member 1 isoform b	3	1.00987	278.295	1.51117	n/a	2.40551	n/a
190341110	NP_859049.2	CCNY	cyclin-Y isoform 2	2	0.926137	n/a	1.50828	n/a	1.64606	n/a
51093832	NP_056450.2	GAPVD1	GTPase-activating protein and VPS9 domain-containing protein 1	2	1.29474	14.9713	1.50334	47.1817	1.82649	102.128
42476024	NP_060206.2	THUMPD1	THUMP domain-containing protein 1	4	0.971924	24.3905	1.50241	46.8152	1.54494	423.503
4506645	NP_000990.1	RPL38	60S ribosomal protein L38	2	0.950796	5.3274	1.50109	19.8758	1.44813	10.1297
291084498	NP_001166166.1	TSFM	elongation factor Ts, mitochondrial isoform 3 precursor	1	0.930367	n/a	1.49934	n/a	1.59489	n/a
21314654	NP_009149.2	RNF139	E3 ubiquitin-protein ligase RNF139	1	0.839046	n/a	1.49933	n/a	1.28494	n/a
13994259	NP_114108.1	MRPS5	28S ribosomal protein S5, mitochondrial	4	0.89578	10.2086	1.49922	87.4689	1.56506	97.3514
30410790	NP_839952.1	TUSC3	tumor suppressor candidate 3 isoform b precursor	1	0.938354	n/a	1.49644	n/a	1.80075	n/a
5031601	NP_005711.1	ARPC1B	actin-related protein 2/3 complex subunit 1B	2	1.02548	0.523244	1.49569	9.76579	1.20985	22.2534
41581463	NP_060207.2	FNBP1L	formin-binding protein 1-like isoform 2	2	1.04036	17.741	1.49569	5.45517	1.59732	26.2279
27597059	NP_056005.1	DNAJC9	dnaJ homolog subfamily C member 9	3	0.766481	21.6188	1.49554	46.2912	1.99312	21.1303
148664216	NP_689821.3	SDE2	protein SDE2 homolog	1	0.870836	n/a	1.49516	n/a	1.85373	n/a
9257257	NP_059830.1	WDR1	WD repeat-containing protein 1 isoform 1	6	0.920631	12.4841	1.49494	188.609	1.41407	201.163
57634534	NP_055950.1	NUP205	nuclear pore complex protein Nup205	2	1.05293	7.58971	1.49435	138.376	1.14315	236.62
255918200	NP_001157636.1	PPP6R3	serine/threonine-protein phosphatase 6 regulatory subunit 3 isoform 3	1	1.00295	n/a	1.49318	n/a	1.46882	n/a
7524346	NP_037543.1	AK2	adenylate kinase 2, mitochondrial isoform b	7	0.962756	6.39481	1.49162	38.2554	1.20072	53.7498
289577114	NP_001036024.3	EIF4G2	eukaryotic translation initiation factor 4 gamma 2 isoform 2	7	1.04597	15.5627	1.49141	47.4914	1.40247	84.1929
120952851	NP_055661.3	KIAA0196	WASH complex subunit strumpellin	2	1.28495	15.0677	1.49073	53.1962	1.68387	28.3445
10764847	NP_004137.2	NDUFB7	NADH dehydrogenase [ubiquinone] 1 beta subcomplex subunit 7	2	0.940505	20.7088	1.48928	n/a	1.9246	n/a
4506929	NP_003016.1	SH3GL1	endophilin-A2 isoform 1	4	1.24407	46.3881	1.482	37.6308	1.56244	31.7999
42822893	NP_976316.1	AMACR	alpha-methylacyl-CoA racemase isoform 2	2	1.06408	10.9968	1.48159	64.1806	0.974785	197.909
142976675	NP_055389.3	STRN3	striatin-3 isoform 2	1	1.55733	112.766	1.48154	28.4843	1.60264	56.5737
61676188	NP_113584.3	HUWE1	E3 ubiquitin-protein ligase HUWE1	8	1.11588	11.1996	1.47927	126.871	1.52997	104.396
332635087	NP_001193876.1	PICALM	phosphatidylinositol-binding clathrin assembly protein isoform 4	2	1.07748	9.12378	1.47621	n/a	1.91298	n/a
71143137	NP_005333.2	HMGB3	high mobility group protein B3	3	0.963123	3.84008	1.47174	17.1282	1.63232	3.11613
315709502	NP_001186863.1	SESN1	sestrin-1 isoform 3	1	1.0637	n/a	1.47101	n/a	2.0533	n/a
4507651	NP_003281.1	TPM4	tropomyosin alpha-4 chain isoform 2	4	0.977628	11.3923	1.47094	32.5266	1.38419	30.6678
323276668	NP_001191011.1	MINOS1	mitochondrial inner membrane organizing system protein 1 isoform b	1	0.930367	n/a	1.46891	n/a	1.46268	n/a
4502991	NP_001857.1	COX7B	cytochrome c oxidase subunit 7B, mitochondrial precursor	1	0.721497	n/a	1.46823	n/a	1.13612	n/a
56237027	NP_006537.3	IGF2BP1	insulin-like growth factor 2 mRNA-binding protein 1 isoform 1	3	0.961208	22.8147	1.46116	105.177	1.33063	84.5319
27477041	NP_036437.1	AP2A2	AP-2 complex subunit alpha-2 isoform 2	1	1.0612	n/a	1.45992	n/a	1.43113	n/a
24371248	NP_076423.2	FUNDC2	FUN14 domain-containing protein 2	5	0.869563	24.0779	1.45431	91.4292	1.35824	42.9303
4758910	NP_004869.1	PTGES	prostaglandin E synthase	1	1.2134	n/a	1.45197	n/a	2.17673	n/a
4758442	NP_004115.1	GMFB	glia maturation factor beta	2	1.95152	127.642	1.45134	102.155	1.0673	52.6987
5453998	NP_006382.1	IPO7	importin-7	4	0.763234	19.6991	1.4512	80.9433	0.85691	71.8181
157276599	NP_001716.2	BPI	bactericidal permeability-increasing protein precursor	1	0.355345	n/a	1.45088	n/a	1.18824	n/a
50593002	NP_003081.2	SNRPA1	U2 small nuclear ribonucleoprotein A'	6	0.929855	10.3368	1.44968	36.8482	1.35647	42.9846
385198097	NP_001245229.1	KIAA1598	shootin-1 isoform e	12	0.882564	16.1754	1.44793	21.28	1.14188	30.5188
57222563	NP_055571.2	CKAP5	cytoskeleton-associated protein 5 isoform b	9	0.839084	48.6471	1.44672	96.5562	1.45119	56.8517
160948599	NP_001073922.2	INTS1	integrator complex subunit 1	1	0.725059	n/a	1.44417	n/a	1.3676	n/a
32307161	NP_003583.2	CUL1	cullin-1	4	1.42677	30.3953	1.4427	18.5039	1.58395	6.12321
4506067	NP_002728.1	PRKCA	protein kinase C alpha type	1	1.06781	n/a	1.4423	n/a	1.48581	n/a
26667177	NP_071446.2	MRPL46	39S ribosomal protein L46, mitochondrial	1	1.04285	n/a	1.43852	n/a	1.33648	n/a
194394141	NP_055640.2	URB1	nucleolar pre-ribosomal-associated protein 1	1	1.00639	n/a	1.43814	n/a	1.23681	n/a
260763955	NP_057049.5	NDUFA13	NADH dehydrogenase [ubiquinone] 1 alpha subcomplex subunit 13	2	0.935018	25.8997	1.43812	16.9024	1.325	3.61814
68051721	NP_065843.3	NCEH1	neutral cholesterol ester hydrolase 1 isoform b	1	1.07891	n/a	1.43666	n/a	1.33826	n/a
208022622	NP_001129064.1	RPS27A	ubiquitin-40S ribosomal protein S27a precursor	7	0.956661	12.7301	1.43616	67.8423	1.26154	97.4216
19913408	NP_001059.2	TOP2B	DNA topoisomerase 2-beta	1	0.959981	n/a	1.43616	n/a	1.41597	n/a
37594471	NP_055177.2	HIBCH	3-hydroxyisobutyryl-CoA hydrolase, mitochondrial isoform 1 precursor	3	0.914089	2.4215	1.43552	22.293	0.960067	61.0897
156119625	NP_002206.2	ITIH1	inter-alpha-trypsin inhibitor heavy chain H1 isoform a precursor	8	1.00808	11.8479	1.43316	74.6386	1.24975	88.1404
186700629	NP_001119527.1	CASK	peripheral plasma membrane protein CASK isoform 3	3	0.97602	27.0044	1.43069	12.8655	1.44529	22.5755
511630715	NP_001265432.1	STT3A	dolichyl-diphosphooligosaccharide--protein glycosyltransferase subunit STT3A isoform a	7	0.90728	8.16862	1.43032	68.4317	1.33225	126.797
45643127	NP_996561.1	GNL3	guanine nucleotide-binding protein-like 3 isoform 2	4	1.15946	46.7794	1.42793	49.527	1.64431	49.0728
7706318	NP_057113.1	DHRS7	dehydrogenase/reductase SDR family member 7 precursor	3	1.17686	41.8458	1.42551	51.0473	1.44059	154.32
33636719	NP_006342.2	TIMM44	mitochondrial import inner membrane translocase subunit TIM44	7	1.01838	13.7501	1.42469	25.3214	1.59788	33.9507
291084757	NP_001166927.1	PDHA1	pyruvate dehydrogenase E1 component subunit alpha, somatic form, mitochondrial isoform 4 precursor	2	0.95808	5.32088	1.42224	74.0197	1.12293	124.408
110347420	NP_001036015.1	SMC2	structural maintenance of chromosomes protein 2	3	1.14923	13.0034	1.42209	13.2979	3.68474	134.979
11096340	NP_063948.1	CLDND1	claudin domain-containing protein 1 isoform a	1	0.914487	n/a	1.42205	n/a	1.48535	n/a
14141161	NP_004492.2	HNRNPU	heterogeneous nuclear ribonucleoprotein U isoform b	16	0.967484	20.225	1.4217	125.514	1.58238	89.4878
385251401	NP_001245259.1	EPB41L1	band 4.1-like protein 1 isoform d	4	0.943049	4.13986	1.42142	74.0896	1.52337	54.6061
21361827	NP_062826.2	METTL3	N6-adenosine-methyltransferase 70 kDa subunit	2	1.13753	19.3625	1.42046	4.21992	0.948589	43.6997
13376331	NP_079160.1	L2HGDH	L-2-hydroxyglutarate dehydrogenase, mitochondrial precursor	2	1.06942	n/a	1.41922	n/a	1.55218	n/a
154800487	NP_006450.2	ERLIN1	erlin-1	4	1.15487	13.9139	1.41882	n/a	0.694182	86.9223
62177110	NP_116193.2	ADO	2-aminoethanethiol dioxygenase	1	1.04411	n/a	1.41804	n/a	1.44412	n/a
4507157	NP_003096.1	SORL1	sortilin-related receptor preproprotein	2	1.29497	n/a	1.41649	n/a	0.91251	n/a
110227617	NP_001036000.1	AGAP3	arf-GAP with GTPase, ANK repeat and PH domain-containing protein 3 isoform b	1	0.992063	n/a	1.41537	n/a	1.41314	n/a
325651836	NP_003592.3	SMARCA5	SWI/SNF-related matrix-associated actin-dependent regulator of chromatin subfamily A member 5	5	1.08307	11.8971	1.41483	24.2459	1.08025	35.4051
4506181	NP_002778.1	PSMA2	proteasome subunit alpha type-2	2	1.02948	0.849106	1.41313	30.8081	1.50838	18.2779
15431301	NP_000962.2	RPL7	60S ribosomal protein L7	7	0.976228	6.13068	1.41256	115.241	1.24854	139.668
45006986	NP_004748.2	AIMP1	aminoacyl tRNA synthase complex-interacting multifunctional protein 1 isoform a precursor	3	0.888004	n/a	1.41239	n/a	1.45449	n/a
38201675	NP_002990.2	SDC4	syndecan-4 precursor	1	0.996716	8.28643	1.41074	4.11556	1.39794	4.07891
156416028	NP_036232.2	DNPEP	aspartyl aminopeptidase	3	0.92051	4.90088	1.40933	36.6641	1.48892	8.43244
284795266	NP_067026.3	SRPRB	signal recognition particle receptor subunit beta	4	0.935142	n/a	1.40842	n/a	1.35029	n/a
217035107	NP_001136037.1	CPSF7	cleavage and polyadenylation specificity factor subunit 7 isoform 3	1	1.00731	n/a	1.40506	n/a	1.66208	n/a
431822408	NP_001258901.1	HSP90AB1	heat shock protein HSP 90-beta isoform c	14	0.948387	17.0413	1.4037	707.41	1.1528	903.956
6912494	NP_036457.1	MAPRE1	microtubule-associated protein RP/EB family member 1	5	0.86708	9.15137	1.40226	89.2807	1.26631	107.915
226958414	NP_001152980.1	IVD	isovaleryl-CoA dehydrogenase, mitochondrial isoform 2 precursor	3	0.77481	41.8172	1.39816	n/a	1.34956	n/a
111118978	NP_059145.2	EPHB2	ephrin type-B receptor 2 isoform 1 precursor	6	1.08165	20.806	1.39762	28.5697	2.14657	111.852
154426322	NP_786924.2	UBR7	putative E3 ubiquitin-protein ligase UBR7	1	0.961868	n/a	1.39757	n/a	1.42329	n/a
118200356	NP_055209.2	GHITM	growth hormone-inducible transmembrane protein	3	0.951083	38.1602	1.39713	7.75095	1.43296	35.669
40807485	NP_036601.2	PRPF6	pre-mRNA-processing factor 6	6	0.916144	14.2554	1.39122	17.6248	1.14376	54.3082
195972866	NP_000412.3	KRT10	keratin, type I cytoskeletal 10	6	0.869091	22.4618	1.38329	49.2591	1.11967	30.1395
223941782	NP_001138829.1	SIN3A	paired amphipathic helix protein Sin3a	2	0.936632	n/a	1.38261	n/a	1.38669	n/a
21361517	NP_056937.2	UBXN1	UBX domain-containing protein 1	2	1.19934	n/a	1.38203	n/a	1.36121	n/a
56699482	NP_056290.3	FAM98A	protein FAM98A	3	0.649963	n/a	1.38165	n/a	1.12635	n/a
14249678	NP_116294.1	RBM17	splicing factor 45	5	0.956538	38.7109	1.37736	7.48683	1.16496	3.54188
217035105	NP_060668.2	DNAJC11	dnaJ homolog subfamily C member 11	2	0.961436	n/a	1.3772	n/a	1.41337	n/a
21071014	NP_078802.2	EPS8L3	epidermal growth factor receptor kinase substrate 8-like protein 3 isoform c	1	0.839893	n/a	1.3753	n/a	1.41892	n/a
260656008	NP_001159575.1	SPINT2	kunitz-type protease inhibitor 2 isoform b precursor	1	0.971375	n/a	1.37434	n/a	1.37109	n/a
260656028	NP_001159579.1	HMGCS2	hydroxymethylglutaryl-CoA synthase, mitochondrial isoform 2 precursor	9	1.0134	14.774	1.37419	24.715	1.28907	27.1697
148664246	NP_665872.2	ANKS4B	ankyrin repeat and SAM domain-containing protein 4B	3	0.970792	7.43792	1.37143	5.14525	1.34224	7.4834
13786127	NP_036253.2	CDC42EP4	cdc42 effector protein 4	1	0.967901	n/a	1.37115	n/a	1.52577	n/a
4505061	NP_002346.1	M6PR	cation-dependent mannose-6-phosphate receptor isoform 1 precursor	3	1.099	22.3744	1.37036	48.2926	1.11277	10.1033
315221152	NP_001186731.1	RPL11	60S ribosomal protein L11 isoform 2	6	1.02622	8.87549	1.36997	818.566	1.26667	859.205
300796343	NP_001180202.1	RBBP5	retinoblastoma-binding protein 5 isoform 3	2	1.0606	66.8503	1.36898	n/a	1.67266	n/a
4506467	NP_002897.1	RDX	radixin isoform 2	6	0.822537	23.8659	1.36783	50.105	1.2833	50.4621
25777600	NP_002798.2	PSMD1	26S proteasome non-ATPase regulatory subunit 1 isoform 1	9	1.0139	11.1617	1.36719	110.087	1.16824	98.3563
6912484	NP_036452.1	PLA2G15	group XV phospholipase A2 precursor	1	1.20591	n/a	1.36692	n/a	1.58554	n/a
25014109	NP_734467.1	C11orf31	selenoprotein H	4	0.96115	3.78696	1.36674	69.8709	1.26327	57.8554
47132620	NP_000414.2	KRT2	keratin, type II cytoskeletal 2 epidermal	5	1.00703	8.95088	1.36628	30.2539	1.39405	35.4645
67191027	NP_000876.3	ITGA4	integrin alpha-4 precursor	1	1.11818	n/a	1.36539	n/a	1.7601	n/a
116256487	NP_006693.3	PNPLA6	neuropathy target esterase isoform b	1	0.876348	n/a	1.36474	n/a	1.17853	n/a
223468564	NP_001138616.1	SLC1A5	neutral amino acid transporter B(0) isoform 2	2	0.707765	34.4511	1.36269	13.3096	1.98154	51.1673
4759274	NP_004777.1	TXNL1	thioredoxin-like protein 1	3	0.932873	8.16726	1.36181	51.3057	1.44369	10.5667
157426879	NP_060391.2	NPLOC4	nuclear protein localization protein 4 homolog	3	0.989833	18.6982	1.36089	216.502	1.2378	133.513
19913396	NP_599031.1	SMTN	smoothelin isoform b	4	0.912051	2.32981	1.36025	83.8136	1.12822	71.285
25777612	NP_002800.2	PSMD3	26S proteasome non-ATPase regulatory subunit 3	8	1.01525	17.2682	1.35937	91.8494	1.49338	56.9616
21618344	NP_036580.2	STAT5B	signal transducer and activator of transcription 5B	1		n/a	1.35837	n/a	1.77666	n/a
44680105	NP_149129.2	CALD1	caldesmon isoform 1	22	0.963705	11.6441	1.35831	84.0961	1.2079	101.962
169636418	NP_115867.2	MRPL38	39S ribosomal protein L38, mitochondrial	2	0.994287	3.03242	1.35811	55.3449	1.47964	50.2462
197333755	NP_006755.4	IFRD2	interferon-related developmental regulator 2	1	2.30617	n/a	1.35798	n/a	0.910175	n/a
4506661	NP_000963.1	RPL7A	60S ribosomal protein L7a	11	0.93728	4.90706	1.35276	107.409	1.08606	67.6955
62912457	NP_001017423.1	ALDH18A1	delta-1-pyrroline-5-carboxylate synthase isoform 2	5	0.863891	12.0113	1.35159	67.2702	1.35528	35.0051
19923362	NP_006279.2	THY1	thy-1 membrane glycoprotein preproprotein	1	2.52827	n/a	1.34522	n/a	1.16304	n/a
24307953	NP_055116.1	ISCU	iron-sulfur cluster assembly enzyme ISCU, mitochondrial isoform ISCU1	2	1.10081	7.56572	1.34245	69.6402	1.39653	58.7648
4557231	NP_000007.1	ACADM	medium-chain specific acyl-CoA dehydrogenase, mitochondrial isoform a precursor	2	1.01088	8.01207	1.34213	58.0275	1.31857	15.6925
24415404	NP_055426.1	MDN1	midasin	1	0.4515	n/a	1.34195	n/a	1.49055	n/a
4557511	NP_001339.1	DAPK3	death-associated protein kinase 3	1	0.794705	34.4484	1.34154	110.763	0.974835	31.36
5730023	NP_006657.1	RUVBL2	ruvB-like 2	9	1.04894	25.2525	1.33771	71.131	1.41333	86.7821
4504255	NP_002097.1	H2AFZ	histone H2A.Z	6	0.977794	10.7794	1.33562	297.546	1.52841	534.427
9665248	NP_000584.2	TAP1	antigen peptide transporter 1	1	0.669071	n/a	1.33509	n/a	0.684385	n/a
8051608	NP_002125.3	HMOX2	heme oxygenase 2	3	0.988341	n/a	1.33448	n/a	1.07814	n/a
72534670	NP_001026859.1	PLAA	phospholipase A-2-activating protein	4	0.968477	6.53618	1.3334	13.6299	1.27464	82.6956
45827753	NP_996742.1	TACC2	transforming acidic coiled-coil-containing protein 2 isoform c	1	0.973604	n/a	1.33285	n/a	1.57135	n/a
4507947	NP_003671.1	YARS	tyrosine--tRNA ligase, cytoplasmic	4	1.02192	17.0014	1.3327	55.8387	1.5061	57.157
110347437	NP_001036010.1	LTBP4	latent-transforming growth factor beta-binding protein 4 isoform c precursor	3	0.606465	n/a	1.33194	n/a	1.45562	n/a
150010552	NP_056073.1	FKBP15	FK506-binding protein 15	1	0.985637	n/a	1.33053	n/a	1.26457	n/a
38195080	NP_055437.2	VWA5A	von Willebrand factor A domain-containing protein 5A isoform 1	2	0.686682	66.212	1.32965	38.363	1.49949	65.5533
4507869	NP_003361.1	VASP	vasodilator-stimulated phosphoprotein	3	0.918608	12.9186	1.32843	12.5173	1.4757	5.7611
320202964	NP_001189333.1	ALDH7A1	alpha-aminoadipic semialdehyde dehydrogenase isoform 3	2	0.79244	n/a	1.32742	n/a	1.19406	n/a
116812610	NP_940852.3	APOOL	apolipoprotein O-like precursor	4	0.989055	22.9514	1.32677	114.357	2.15326	28.5266
335334993	NP_001229430.1	MIF4GD	MIF4G domain-containing protein isoform 4	1	0.740005	n/a	1.32247	n/a	2.37984	n/a
148886661	NP_071904.4	XPO4	exportin-4	2	1.43921	4.34285	1.32226	35.7209	1.39498	52.4765
223029510	NP_001138548.1	EML4	echinoderm microtubule-associated protein-like 4 isoform b	11	0.94475	20.9438	1.31982	84.445	1.44944	57.2476
21071032	NP_057306.2	DDX41	probable ATP-dependent RNA helicase DDX41	1	0.787906	n/a	1.31891	n/a		n/a
20149304	NP_065752.1	ISY1	pre-mRNA-splicing factor ISY1 homolog isoform 2	2	0.816179	n/a	1.31772	65.2191	1.06719	n/a
309951086	NP_001185478.1	NOL4	nucleolar protein 4 isoform 5	1	1.03722	n/a	1.31557	n/a	1.33713	n/a
155030216	NP_001093869.1	PDS5A	sister chromatid cohesion protein PDS5 homolog A isoform 1	3	0.957595	21.558	1.31505	6.20283	1.40404	19.6554
51094101	NP_076977.3	DDX54	ATP-dependent RNA helicase DDX54 isoform 2	2	1.06272	11.0943	1.31334	3.67978	1.3055	33.4991
7706481	NP_057373.1	CAB39	calcium-binding protein 39	1	0.96624	n/a	1.31207	n/a	1.31733	n/a
11321583	NP_003841.1	SUCLA2	succinyl-CoA ligase [ADP-forming] subunit beta, mitochondrial precursor	11	0.973803	11.4179	1.31196	147.008	1.4296	100.281
151101292	NP_110382.3	TMX1	thioredoxin-related transmembrane protein 1 precursor	3	0.635258	27.8109	1.3104	266.781	1.05706	409.42
375151597	NP_001243509.1	RPL10	60S ribosomal protein L10 isoform c	2	0.933775	n/a	1.30859	n/a	1.03244	n/a
4759160	NP_004166.1	SNRPD3	small nuclear ribonucleoprotein Sm D3	1	0.998613	n/a	1.30795	n/a	1.0935	n/a
95113664	NP_060684.4	LRRC1	leucine-rich repeat-containing protein 1	1	1.49223	n/a	1.30651	n/a	1.21535	n/a
192807320	NP_001122320.1	SMARCA4	transcription activator BRG1 isoform F	1	0.681883	n/a	1.30172	n/a	1.27953	n/a
83700225	NP_001667.4	ATP12A	potassium-transporting ATPase alpha chain 2 isoform 2	1	0.994402	n/a	1.29995	n/a	1.35807	n/a
209862760	NP_001129470.1	NDUFB11	NADH dehydrogenase [ubiquinone] 1 beta subcomplex subunit 11, mitochondrial isoform 2	1	0.955223	0.956028	1.29859	25.7895	1.18885	30.1584
7662340	NP_055756.1	MORC2	MORC family CW-type zinc finger protein 2	1	0.8532	n/a	1.29823	n/a	1.22365	n/a
153946401	NP_001196.2	BNIP1	vesicle transport protein SEC20 isoform BNIP1	2	0.798662	n/a	1.29819	10.095	1.36299	22.1983
188528696	NP_001120869.1	ERLEC1	endoplasmic reticulum lectin 1 isoform 2 precursor	2	0.738093	n/a	1.29599	n/a	1.08589	n/a
23110944	NP_002782.1	PSMA6	proteasome subunit alpha type-6	5	1.16718	11.665	1.29528	174.466	1.53344	113.735
8922601	NP_060654.1	ARL8B	ADP-ribosylation factor-like protein 8B	1	0.944073	3.14182	1.29441	10.6275	1.21305	8.8561
70167113	NP_001020278.1	ADAR	double-stranded RNA-specific adenosine deaminase isoform d	4	0.881931	17.4054	1.2935	30.1174	1.13556	55.6164
37588869	NP_071347.2	RNF123	E3 ubiquitin-protein ligase RNF123	1	1.17523	n/a	1.29159	n/a	0.437991	n/a
44889481	NP_036355.2	MYO1B	unconventional myosin-Ib isoform 2	9	0.871328	18.2313	1.28994	166.176	1.20603	180.641
24308049	NP_056157.1	PPWD1	peptidylprolyl isomerase domain and WD repeat-containing protein 1	1	1.60298	n/a	1.28756	n/a		n/a
34101288	NP_059133.1	CPSF2	cleavage and polyadenylation specificity factor subunit 2	1	0.927936	13.4323	1.28582	3.86743	1.00298	4.60678
315583337	NP_060692.2	PARVA	alpha-parvin	7	0.956908	33.1735	1.28531	7330.25	0.98532	6669.47
21396480	NP_031393.2	RALY	RNA-binding protein Raly isoform 2	9	0.951114	5.64544	1.28524	104.867	1.45876	108.707
316983171	NP_001186916.1	NDUFB6	NADH dehydrogenase [ubiquinone] 1 beta subcomplex subunit 6 isoform 3	1	0.946568	6.52533	1.28316	2.19001	1.23668	0.473211
112421122	NP_056083.3	DNAJC13	dnaJ homolog subfamily C member 13	4	0.952648	27.4271	1.28023	9.80761	1.30744	11.1865
5032113	NP_005862.1	SMNDC1	survival of motor neuron-related-splicing factor 30	1	1.21684	n/a	1.28001	n/a	1.50249	n/a
7427519	NP_005906.2	MCM6	DNA replication licensing factor MCM6	2	0.695922	n/a	1.2779	n/a	1.09343	n/a
73747844	NP_002302.2	LIG3	DNA ligase 3 isoform beta precursor	1	0.947316	n/a	1.27709	n/a	1.24819	n/a
10863877	NP_066928.1	PLSCR1	phospholipid scramblase 1	1	1.01041	n/a	1.27432	n/a	1.10932	n/a
222537759	NP_001138503.1	PLAU	urokinase-type plasminogen activator isoform 2	1	0.984235	n/a	1.27211	n/a	2.17868	n/a
4557469	NP_001273.1	AP2B1	AP-2 complex subunit beta isoform b	5	0.957883	3.67564	1.26569	3.79944	1.04586	6.5086
24497620	NP_055045.2	SRP68	signal recognition particle subunit SRP68 isoform 1	4	0.918095	13.029	1.2651	33.8766	1.32591	48.6997
5174607	NP_005958.1	NAB2	NGFI-A-binding protein 2	1	1.43128	n/a	1.26428	n/a	2.30112	n/a
385862224	NP_001245350.1	ZFYVE19	zinc finger FYVE domain-containing protein 19 isoform 4	1	0.945002	n/a	1.25942	n/a	1.18798	n/a
14043026	NP_003752.2	VAMP8	vesicle-associated membrane protein 8	1	0.950259	n/a	1.25889	n/a	1.25233	n/a
5901922	NP_008996.1	CDC37	hsp90 co-chaperone Cdc37	7	0.960243	3.40997	1.25724	54.549	1.21769	48.6285
19924129	NP_005723.2	RAD50	DNA repair protein RAD50	6	0.875579	24.8985	1.25685	52.3362	1.04279	41.9373
45594240	NP_002329.2	LSAMP	limbic system-associated membrane protein preproprotein	1	1.0623	n/a	1.25655	n/a	1.42772	n/a
296531351	NP_001171826.1	PHF8	histone lysine demethylase PHF8 isoform 3	2	0.966546	14.1306	1.255	133.465	1.05877	198.302
24234690	NP_005581.2	MRE11A	double-strand break repair protein MRE11A isoform 2	1	0.867045	n/a	1.25466	n/a	1.0485	n/a
7305303	NP_038464.1	NCKAP1	nck-associated protein 1 isoform 1	7	0.988362	9.46151	1.25343	134.852	1.27592	130.929
5730027	NP_006550.1	KHDRBS1	KH domain-containing, RNA-binding, signal transduction-associated protein 1 isoform 1	2	0.915171	0.203022	1.2514	33.7114	1.14422	21.0916
39932589	NP_277050.2	ARHGAP18	rho GTPase-activating protein 18	6	0.961065	3.99959	1.24995	37.2992	1.37659	10.5745
24308456	NP_714913.1	ELMOD2	ELMO domain-containing protein 2	2	2.59858	n/a	1.24962	n/a	2.84416	n/a
32130516	NP_004704.2	NEMF	nuclear export mediator factor NEMF	2	0.830881	n/a	1.24867	n/a	1.14086	n/a
24497601	NP_694880.1	EDF1	endothelial differentiation-related factor 1 isoform beta	1	0.962388	1.57709	1.24857	8.52956	1.21022	6.02339
7705274	NP_057691.1	ARMCX3	armadillo repeat-containing X-linked protein 3	4	0.833257	20.694	1.24669	43.5565	1.6239	67.3172
156523968	NP_001609.2	PARP1	poly [ADP-ribose] polymerase 1	11	0.980775	10.5285	1.2461	107.539	1.36841	114.891
195963412	NP_001124388.1	TGFBR1	TGF-beta receptor type-1 isoform 2 precursor	1	1.05666	n/a	1.24441	n/a	1.19571	n/a
217416366	NP_116107.3	MFSD9	major facilitator superfamily domain-containing protein 9	1	0.866664	n/a	1.24413	n/a	2.07855	n/a
7657345	NP_055156.1	MTCH1	mitochondrial carrier homolog 1 PSAP-LS	1	0.855845	n/a	1.24385	n/a	1.31276	n/a
194688133	NP_001124160.1	HMGB2	high mobility group protein B2	2	1.10025	25.4039	1.24338	32.8867	1.04422	68.2875
5031631	NP_005497.1	SCARB2	lysosome membrane protein 2 isoform 1 precursor	4	0.79133	31.5642	1.24251	61.7356	0.886855	11.6728
4507873	NP_003363.1	VBP1	prefoldin subunit 3	2	0.942392	4.9143	1.2419	129.04	1.19931	115.555
c001	ALBU_BOVIN			5	0.893482	11.2944	1.24075	86.4606	1.55314	71.6088
38202255	NP_689508.3	TARS	threonine--tRNA ligase, cytoplasmic isoform 1	3	0.939712	n/a	1.23859	3.93751	1.32425	19.9367
166795299	NP_006507.2	SLC2A1	solute carrier family 2, facilitated glucose transporter member 1	1	1.09883	n/a	1.23853	n/a	1.115	n/a
366039979	NP_001243000.1	RNF213	E3 ubiquitin-protein ligase RNF213 isoform 3	7	0.973254	25.8175	1.23779	72.0837	0.853847	20.4497
67763814	NP_055939.1	GRAMD4	GRAM domain-containing protein 4	2	1.05171	13.2107	1.23758	n/a	1.32307	n/a
109638749	NP_008878.3	SRP72	signal recognition particle subunit SRP72 isoform 1	6	0.883611	5.30677	1.23651	22.7525	1.39167	14.3739
57863269	NP_055871.1	RRP1B	ribosomal RNA processing protein 1 homolog B	4	0.930054	31.0739	1.23528	54.0691	1.37518	30.7291
4885399	NP_005436.1	SMC3	structural maintenance of chromosomes protein 3	12	0.91878	14.7799	1.23527	132.941	1.16553	119.33
24308326	NP_115806.1	BRSK1	serine/threonine-protein kinase BRSK1	1	0.974101	n/a	1.23419	n/a	1.17068	n/a
284813531	NP_002430.3	MSH3	DNA mismatch repair protein Msh3	2	0.741042	19.4641	1.23304	12.8159	2.19788	28.7734
55953087	NP_036473.2	GTPBP4	nucleolar GTP-binding protein 1	3	0.538995	82.51	1.23134	2435.59	1.11803	3658.6
383792178	NP_001244316.1	CHEK2	serine/threonine-protein kinase Chk2 isoform d	1		n/a	1.2304	n/a	1.26396	n/a
380837121	NP_004883.3	SEC22B	vesicle-trafficking protein SEC22b precursor	4	0.940248	5.5302	1.22753	113.775	1.18533	110.35
4504327	NP_000174.1	HADHB	trifunctional enzyme subunit beta, mitochondrial precursor	4	0.974092	4.77844	1.2264	65.3279	1.19736	61.0896
33285002	NP_060915.2	VIMP	selenoprotein S	1	0.886004	5.43448	1.22481	4.86518	1.13132	0.955449
13129018	NP_076956.1	GGCT	gamma-glutamylcyclotransferase isoform 1	3	0.839848	5.1381	1.22365	44.9321	1.12138	37.5695
16117791	NP_000987.2	RPL35A	60S ribosomal protein L35a	3	1.11135	14.0805	1.22351	1139.47	4.42823	103.507
12408654	NP_036332.2	B3GAT3	galactosylgalactosylxylosylprotein 3-beta-glucuronosyltransferase 3	1	0.918951	n/a	1.22284	n/a	1.71298	n/a
116534898	NP_001934.2	DSG2	desmoglein-2 preproprotein	10	1.00298	23.8538	1.22118	39.8153	1.00906	36.5566
42714657	NP_963965.1	TCF7	transcription factor 7 isoform 4	1	1.06807	n/a	1.22099	n/a	1.5881	n/a
66773344	NP_954650.2	SOGA1	protein SOGA1 isoform 2	1	1.01113	n/a	1.22022	n/a	1.42743	n/a
5803165	NP_006799.1	SEC61B	protein transport protein Sec61 subunit beta	1	1.11711	40.8186	1.21983	5.07134	1.06587	7.06731
164698494	NP_001106963.1	2014-09-09	septin-9 isoform a	7	1.01224	6.43536	1.21972	31.3726	1.25457	36.7814
14790119	NP_004337.2	CASP3	caspase-3 preproprotein	1	0.929202	n/a	1.21738	n/a	1.22108	n/a
385275076	NP_001245267.1	NDUFA12	NADH dehydrogenase [ubiquinone] 1 alpha subcomplex subunit 12 isoform b	1	0.922922	n/a	1.21695	n/a	1.15027	n/a
7657599	NP_055241.1	SNX5	sorting nexin-5	3	0.916228	10.4884	1.21518	96.2376	1.21204	74.7193
148539876	NP_001610.2	ADRBK1	beta-adrenergic receptor kinase 1	1	0.891824	n/a	1.21479	n/a	1.16718	n/a
381214353	NP_001244211.1	DIS3L2	DIS3-like exonuclease 2 isoform 3	1	0.919078	n/a	1.21444	n/a	0.940439	n/a
4757952	NP_001782.1	CDC42	cell division control protein 42 homolog isoform 1 precursor	9	0.924205	7.43407	1.21411	72.9774	1.18541	66.8972
19923919	NP_612402.1	REEP6	receptor expression-enhancing protein 6	1	0.86592	n/a	1.21268	n/a	1.41288	n/a
75709192	NP_054892.2	BABAM1	BRISC and BRCA1-A complex member 1	1	0.929574	n/a	1.2115	n/a	1.27319	n/a
4504301	NP_003529.1	HIST1H4A	histone H4	15	0.962848	11.4811	1.21023	43.248	1.35005	52.7832
145309326	NP_002284.3	LAMC1	laminin subunit gamma-1 precursor	12	0.94844	2.1351	1.20945	43.2351	1.18677	59.2759
156564398	NP_079353.3	TOE1	target of EGR1 protein 1	1	1.01979	n/a	1.20882	n/a	1.17429	n/a
315139020	NP_001186715.1	FKBP1A	peptidyl-prolyl cis-trans isomerase FKBP1A isoform b	1	0.888561	n/a	1.2087	n/a	1.17704	n/a
5032051	NP_005608.1	RPS14	40S ribosomal protein S14	7	0.945212	6.07254	1.20791	34.4975	1.17177	34.7367
170763533	NP_001116299.1	ESRP1	epithelial splicing regulatory protein 1 isoform 5	2	1.83006	117.076	1.20763	108.94	1.05178	172.341
296179386	NP_001171690.1	CLTA	clathrin light chain A isoform e	1	1.0307	n/a	1.20645	n/a	1.2307	n/a
4506027	NP_002711.1	PPP4C	serine/threonine-protein phosphatase 4 catalytic subunit	1	0.620424	n/a	1.20451	n/a	2.66183	n/a
39995082	NP_060225.4	NSUN2	tRNA (cytosine(34)-C(5))-methyltransferase isoform 1	4	0.907173	23.7829	1.20417	108.728	1.00229	98.068
374671775	NP_001243439.1	SSBP1	single-stranded DNA-binding protein, mitochondrial precursor	4	0.887593	13.6242	1.20348	43.2089	1.06014	64.512
7661556	NP_056494.1	TRUB2	probable tRNA pseudouridine synthase 2	1	0.355528	n/a	1.20278	n/a	0.450597	n/a
4826878	NP_005100.1	OXSR1	serine/threonine-protein kinase OSR1	2	0.936623	10.5142	1.20273	85.3828	1.10984	94.1929
54792071	NP_001005849.1	SUMO2	small ubiquitin-related modifier 2 isoform b precursor	3	0.925989	18.373	1.20177	10.5863	1.17835	17.698
4502509	NP_001727.1	C5AR1	C5a anaphylatoxin chemotactic receptor	1	0.508104	n/a	1.20133	n/a	2.46654	n/a
7706645	NP_057231.1	PPME1	protein phosphatase methylesterase 1 isoform a	1	1.0001	n/a	1.20081	n/a	1.32594	n/a
371502127	NP_001243069.1	CAPG	macrophage-capping protein isoform 2	8	0.950512	7.21319	1.20042	72.0214	1.18967	83.4149
212274337	NP_001130046.1	LANCL1	lanC-like protein 1	1	1.19583	n/a	1.19983	n/a	1.03335	n/a
444909144	NP_001263308.1	LZTFL1	leucine zipper transcription factor-like protein 1 isoform 3	1	0.787882	n/a	1.19948	n/a	1.43362	n/a
209915570	NP_001129601.1	APP	amyloid beta A4 protein isoform e precursor	1	0.790093	n/a	1.19916	n/a	1.00327	n/a
4758220	NP_004690.1	FAM50A	protein FAM50A	2	0.881212	25.3846	1.19287	52.7451	1.22435	77.6134
4505369	NP_002486.1	NDUFS4	NADH dehydrogenase [ubiquinone] iron-sulfur protein 4, mitochondrial precursor	1	0.866216	n/a	1.19177	n/a	1.08538	n/a
4506357	NP_003944.1	MPZL1	myelin protein zero-like protein 1 isoform a precursor	1	0.786368	n/a	1.19084	n/a	1.27467	n/a
223555917	NP_848927.2	MTDH	protein LYRIC	7	0.963794	17.5117	1.19046	192.681	1.1174	284.77
295849303	NP_001171534.1	C2	complement C2 isoform 3	1	0.916591	n/a	1.18598	n/a	1.20332	n/a
4502193	NP_001645.1	ARAF	serine/threonine-protein kinase A-Raf isoform 1	2	0.461254	102.427	1.18535	13.2093	1.2362	58.5854
14269586	NP_110438.1	MRPS26	28S ribosomal protein S26, mitochondrial	2	0.955609	8.6661	1.18348	1.58529	1.26215	10.8234
4507491	NP_003240.1	THOP1	thimet oligopeptidase	1		n/a	1.18333	n/a	2.52453	n/a
4506455	NP_002892.1	RCN1	reticulocalbin-1 precursor	3	0.998889	15.5542	1.1823	42.8786	1.06166	27.7188
65288071	NP_073585.8	TNS3	tensin-3	1	0.965096	n/a	1.17925	n/a	1.07541	n/a
186928850	NP_055899.2	MRPS27	28S ribosomal protein S27, mitochondrial	2	1.0263	n/a	1.17855	n/a	1.06608	n/a
70906435	NP_005132.2	FGB	fibrinogen beta chain isoform 1 preproprotein	13	0.923655	11.5859	1.17853	129.758	1.7834	186.217
4502743	NP_001790.1	CDK7	cyclin-dependent kinase 7	1		n/a	1.17843	n/a	2.209	n/a
33356128	NP_078837.3	NAA16	N-alpha-acetyltransferase 16, NatA auxiliary subunit isoform 1	2	0.946468	14.6988	1.17702	175.466	0.93089	70.4765
4506387	NP_002865.1	RAD23B	UV excision repair protein RAD23 homolog B isoform 1	6	0.969449	16.7027	1.1769	19.9234	1.17231	28.798
4506005	NP_002700.1	PPP1CB	serine/threonine-protein phosphatase PP1-beta catalytic subunit isoform 1	1	1.00454	n/a	1.17493	n/a	1.24687	n/a
74275350	NP_000705.2	TSPO	translocator protein	1		n/a	1.17481	n/a	2.11742	n/a
44890062	NP_919254.2	ELMSAN1	ELM2 and SANT domain-containing protein 1	2	1.02159	7.98236	1.1738	30.2762	1.76422	66.9547
239047795	NP_778228.3	PLEKHA7	pleckstrin homology domain-containing family A member 7	1	1.12307	n/a	1.17369	n/a	1.22685	n/a
19913432	NP_004682.2	ATP6V0D1	V-type proton ATPase subunit d 1	2	0.800416	n/a	1.17316	n/a	2.18846	n/a
23618867	NP_073591.2	SFXN1	sideroflexin-1	5	0.942348	5.14572	1.16992	137.572	1.04381	144.941
24797095	NP_722546.1	PYCR1	pyrroline-5-carboxylate reductase 1, mitochondrial isoform 2	4	0.923462	10.3668	1.16968	45.3521	1.14739	70.3383
27883842	NP_005171.4	BMI1	polycomb complex protein BMI-1	1	0.789204	n/a	1.16941	n/a	1.2601	n/a
73747917	NP_061313.2	TAP2	antigen peptide transporter 2 isoform 2	1	0.90063	n/a	1.16893	n/a	1.11443	n/a
7657269	NP_055847.1	PDS5B	sister chromatid cohesion protein PDS5 homolog B	3	0.875217	12.6218	1.16852	67.6858	1.13786	30.439
63252900	NP_001018006.1	TPM1	tropomyosin alpha-1 chain isoform 4	1	0.956893	n/a	1.16825	n/a	1.19315	n/a
42794752	NP_004448.2	ACSL3	long-chain-fatty-acid--CoA ligase 3	1	0.776044	n/a	1.15922	n/a		n/a
13124883	NP_036443.1	KIN	DNA/RNA-binding protein KIN17	1	0.575661	n/a	1.15845	n/a	1.70408	n/a
61835204	NP_001013454.1	MPST	3-mercaptopyruvate sulfurtransferase isoform 2	2	1.00505	8.21128	1.15567	5.96083	1.05411	7.27134
4503519	NP_003745.1	EIF3F	eukaryotic translation initiation factor 3 subunit F	1	1.54432	n/a	1.15421	n/a	0.34133	n/a
154350241	NP_065073.3	KIAA1244	brefeldin A-inhibited guanine nucleotide-exchange protein 3	2	0.879611	2.87417	1.15382	7.17685	1.22866	31.0299
55749758	NP_775873.2	DIP2B	disco-interacting protein 2 homolog B	6	0.92035	19.4841	1.15287	34.4747	1.13424	32.7083
47717125	NP_001001132.1	ITSN1	intersectin-1 isoform ITSN-s	2	0.960399	21.5614	1.15189	49.8412	1.13846	40.1167
148529023	NP_115558.3	FAM175B	BRISC complex subunit Abro1	2	1.05803	4.78161	1.15139	115.546	0.849778	59.9289
157426887	NP_065863.2	DOCK6	dedicator of cytokinesis protein 6	1	0.788449	n/a	1.14878	n/a	1.44986	n/a
33286418	NP_002645.3	PKM	pyruvate kinase isozymes M1/M2 isoform a	28	0.949325	11.3141	1.1478	101.992	0.855973	114.165
157388937	NP_060389.2	STX17	syntaxin-17	2	0.904308	31.5365	1.14774	2.97267	1.36303	1.79796
296278206	NP_001171723.1	PARD3	partitioning defective 3 homolog isoform 11	1	1.01024	n/a	1.14774	n/a	1.3535	n/a
7657381	NP_055317.1	PRPF19	pre-mRNA-processing factor 19	3	1.03829	9.42369	1.14571	2.29797	1.23053	6.16743
4758078	NP_004374.1	CSK	tyrosine-protein kinase CSK	2	1.087	n/a	1.14473	n/a	1.2278	n/a
186972143	NP_003282.2	TPP2	tripeptidyl-peptidase 2	2	1.86951	126.242	1.14436	n/a	1.11506	5.81024
313747419	NP_001186385.1	BRD2	bromodomain-containing protein 2 isoform 3	2	0.829242	n/a	1.14402	n/a	1.00485	n/a
46852390	NP_005427.2	CCDC6	coiled-coil domain-containing protein 6	4	0.992199	9.09961	1.14366	13.4189	1.35961	45.4853
54144629	NP_001005745.1	NUMB	protein numb homolog isoform 4	2	0.906009	4.42645	1.14175	54.667	1.05796	89.6163
5453539	NP_006443.1	PAICS	multifunctional protein ADE2 isoform 2	9	0.970374	7.9861	1.13937	6.70751	1.15243	61.5852
429836877	NP_001258847.1	SEC11A	signal peptidase complex catalytic subunit SEC11A isoform 5	2	0.971541	2.9765	1.13831	44.6003	1.19942	62.7115
13027378	NP_005462.1	GNPDA1	glucosamine-6-phosphate isomerase 1	1	0.938868	0.302594	1.13622	4.216	1.04748	9.81732
17158044	NP_001001.2	RPS6	40S ribosomal protein S6	11	0.980551	12.666	1.13593	77.9249	0.980339	99.8039
55741709	NP_067062.1	RBM25	RNA-binding protein 25	4	0.861999	14.3899	1.13439	63.5515	1.04319	50.4529
189242612	NP_001108603.2	C6	complement component C6 precursor	3	0.808904	1.38635	1.13399	20.9753	0.980866	40.8472
133922562	NP_068800.2	PGM5	phosphoglucomutase-like protein 5	4	1.17186	32.1884	1.13313	1.05023	0.74009	67.9069
29826285	NP_817125.1	MRPL47	39S ribosomal protein L47, mitochondrial isoform b	1	0.757987	n/a	1.13252	n/a	0.910382	n/a
503775288	NP_001265178.1	RNF214	RING finger protein 214 isoform 2	2	1.45486	n/a	1.1281	n/a	1.34204	n/a
156104889	NP_004520.2	MLLT3	protein AF-9	1	0.882859	n/a	1.12792	n/a	1.68504	n/a
17978477	NP_068375.3	VPS11	vacuolar protein sorting-associated protein 11 homolog	2	0.917461	20.9186	1.12691	n/a	1.11024	n/a
4502673	NP_001768.1	CD47	leukocyte surface antigen CD47 isoform 1 precursor	5	0.992089	3.56379	1.12601	39.0889	1.14278	38.3242
66392203	NP_001018146.1	NME1-NME2	NME1-NME2 protein	7	0.937245	26.4984	1.12527	82.9285	0.941751	89.2858
348605229	NP_001231742.1	FOXP1	forkhead box protein P1 isoform 6	1	0.992371	n/a	1.12443	n/a	0.901426	n/a
154350198	NP_060851.2	C19orf66	UPF0515 protein C19orf66	1	1.04104	n/a	1.12198	n/a	0.99429	n/a
197276600	NP_001127836.1	MAP4	microtubule-associated protein 4 isoform 4	7	0.9764	6.9813	1.12101	273.461	1.03253	1461.05
44921615	NP_787072.2	EXOC8	exocyst complex component 8	1	0.697457	n/a	1.12091	n/a	0.736673	n/a
4506679	NP_001005.1	RPS10	40S ribosomal protein S10	3	0.931375	22.8485	1.11696	11.0625	1.26478	17.8861
53729320	NP_001005413.1	ZWINT	ZW10 interactor isoform b	1	1.34843	n/a	1.11557	n/a	1.45082	n/a
55743118	NP_036365.1	RAB3GAP1	rab3 GTPase-activating protein catalytic subunit isoform 2	1	0.875194	n/a	1.1136	n/a	0.94751	n/a
154426312	NP_001093894.1	SPATS2L	SPATS2-like protein isoform b	4	0.934239	4.93607	1.11342	48.6025	1.14368	23.2105
47679089	NP_001001330.1	REEP3	receptor expression-enhancing protein 3	1	1.06168	n/a	1.11253	n/a	1.47565	n/a
209862907	NP_006466.2	POSTN	periostin isoform 1 precursor	1	1.02689	n/a	1.11091	n/a	1.17451	n/a
73808090	NP_001027464.1	ZNF207	zinc finger protein 207 isoform b	2	0.779787	3.41988	1.11091	12.4225	1.23659	10.6797
283436224	NP_001164007.1	ATAD3A	ATPase family AAA domain-containing protein 3A isoform 3	4	0.906046	19.0736	1.10837	117.73	0.898224	133.768
4505227	NP_002423.1	MNDA	myeloid cell nuclear differentiation antigen	4	0.62357	71.7531	1.10814	24.1721	0.88607	95.2155
374429545	NP_001243405.1	WDR92	WD repeat-containing protein 92 isoform 2	1	1.06611	n/a	1.10688	n/a	1.22139	n/a
5453690	NP_006136.1	DNAJB1	dnaJ homolog subfamily B member 1	6	1.01156	3.78372	1.10616	79.8899	0.959465	58.1281
4506185	NP_002780.1	PSMA4	proteasome subunit alpha type-4 isoform 1	9	1.0129	11.4608	1.10557	124.42	0.975985	159.039
116812591	NP_008964.3	RER1	protein RER1	1	0.864588	n/a	1.10417	n/a	1.27985	n/a
27735067	NP_775752.1	MISP	uncharacterized protein C19orf21	2	0.974918	23.7432	1.1027	22.7296	0.824101	69.7861
312284090	NP_001186054.1	COPS3	COP9 signalosome complex subunit 3 isoform 2	2	0.678856	71.0411	1.09996	95.7997	2.04653	9.89237
28395049	NP_776188.1	COX18	mitochondrial inner membrane protein COX18	1	1.017	n/a	1.09935	n/a	1.04244	n/a
4504193	NP_001505.1	GTF2B	transcription initiation factor IIB	1	0.84976	n/a	1.0992	n/a	1.25219	n/a
193788632	NP_001123359.1	DNAJC2	dnaJ homolog subfamily C member 2 isoform 2	2	0.930525	4.75992	1.09831	138.677	1.10566	144.249
20149547	NP_002944.2	RPS6KA1	ribosomal protein S6 kinase alpha-1 isoform a	2	0.917755	23.3989	1.09705	21.0425	1.02856	43.0943
188219625	NP_005834.4	STAM2	signal transducing adapter molecule 2	1	0.971556	n/a	1.09561	n/a	1.06575	n/a
10863889	NP_005137.1	SART1	U4/U6.U5 tri-snRNP-associated protein 1	8	0.86962	28.4767	1.09469	82.3074	1.38758	66.3235
126362971	NP_005981.3	STK10	serine/threonine-protein kinase 10	2	1.15143	49.265	1.09112	60.4896	1.17741	86.1865
310832410	NP_001185594.1	ARHGEF12	rho guanine nucleotide exchange factor 12 isoform 2	1	1.01522	n/a	1.09044	n/a	1.2183	n/a
5729850	NP_006487.1	GNAI3	guanine nucleotide-binding protein G(k) subunit alpha	1	1.27985	n/a	1.08903	n/a	0.851425	n/a
266453278	NP_001161093.1	ATXN10	ataxin-10 isoform 2	1	0.89949	n/a	1.08747	n/a	1.00964	n/a
158937236	NP_006301.3	NPEPPS	puromycin-sensitive aminopeptidase	4	0.897049	13.023	1.08737	44.2083	1.2756	57.4602
4502981	NP_001852.1	COX4I1	cytochrome c oxidase subunit 4 isoform 1, mitochondrial precursor	2	0.867212	33.2874	1.08504	9.57046	0.692088	96.3987
514052659	NP_001265481.1	TUBA4A	tubulin alpha-4A chain isoform 2	3	0.991618	245.922	1.08436	4.61552	1.03487	6.74878
189181666	NP_000511.2	HEXA	beta-hexosaminidase subunit alpha preproprotein	1	1.80653	n/a	1.08389	n/a	1.13832	n/a
302129652	NP_001180473.1	ANXA6	annexin A6 isoform 2	12	0.98196	11.2718	1.08367	290.616	0.800001	657.238
56550047	NP_001008225.1	UACA	uveal autoantigen with coiled-coil domains and ankyrin repeats isoform 2	2	0.913449	27.4173	1.08272	66.6345	0.941681	67.0438
54633315	NP_055412.2	DNTTIP2	deoxynucleotidyltransferase terminal-interacting protein 2	2	1.07654	11.002	1.08092	2.59565	1.01339	7.28567
189458817	NP_003225.2	TFRC	transferrin receptor protein 1	6	0.926995	9.1337	1.07948	184.087	2.23996	189.621
312032405	NP_001185825.1	ACY1	aminoacylase-1 isoform b	2	1.17333	n/a	1.07875	n/a	0.660314	n/a
18105037	NP_004709.2	COX7A2L	cytochrome c oxidase subunit 7A-related protein, mitochondrial	1	0.943125	n/a	1.07862	n/a	1.03907	n/a
156105685	NP_009119.2	ABCB8	ATP-binding cassette sub-family B member 8, mitochondrial	1	2.91173	n/a	1.07652	n/a	0.852908	n/a
5729953	NP_006591.1	NUDC	nuclear migration protein nudC	3	1.06231	8.72472	1.07637	38.1876	1.09938	41.1272
4503727	NP_002004.1	FKBP3	peptidyl-prolyl cis-trans isomerase FKBP3	3	0.895966	15.2975	1.07604	110.216	0.981443	21.7303
42560244	NP_004783.2	PPIG	peptidyl-prolyl cis-trans isomerase G	1	1.27535	n/a	1.07342	n/a	1.04886	n/a
8393009	NP_037397.2	VPS51	vacuolar protein sorting-associated protein 51 homolog	2	1.45261	20.0734	1.07313	n/a	1.95637	n/a
71040094	NP_001020766.1	ARFIP1	arfaptin-1 isoform 1	5	0.874522	3.33827	1.07259	17.3359	1.1635	7.60839
8923911	NP_061167.1	LANCL2	lanC-like protein 2	1	1.07	18.972	1.07217	27.1372	1.27818	0.677495
14591904	NP_002898.2	RECQL	ATP-dependent DNA helicase Q1	3	0.957529	44.3752	1.07164	131.261	1.26335	134.407
33356177	NP_002825.3	PTPN11	tyrosine-protein phosphatase non-receptor type 11 isoform 1	2	0.987036	0.139882	1.07135	39.5759	1.12678	38.1287
48255898	NP_620614.2	SMARCA2	probable global transcription activator SNF2L2 isoform b	4	1.07941	26.2665	1.07091	n/a	1.00884	n/a
393715095	NP_001257329.1	TUBA1A	tubulin alpha-1A chain isoform 2	7	0.997661	18.7843	1.06671	555.783	1.17202	45.9668
32483399	NP_002568.2	PAK2	serine/threonine-protein kinase PAK 2	5	1.04077	2.35796	1.06599	25.3955	1.02237	322.858
124256489	NP_057736.4	CRNKL1	crooked neck-like protein 1	1	0.910357	n/a	1.06575	n/a	1.1273	n/a
47078240	NP_004118.3	GPS1	COP9 signalosome complex subunit 1 isoform 2	4	0.953594	2.81529	1.065	61.685	0.989656	63.7436
33342278	NP_079480.2	TRABD	traB domain-containing protein	1	1.21775	n/a	1.06296	n/a	1.25974	n/a
37595752	NP_919424.1	LBR	lamin-B receptor	1	0.98457	3.23047	1.06237	11.8711	1.05118	13.3032
34147522	NP_064632.2	ADCK3	chaperone activity of bc1 complex-like, mitochondrial	1	1.24552	n/a	1.06103	n/a	0.896306	n/a
25777615	NP_002802.2	PSMD7	26S proteasome non-ATPase regulatory subunit 7	4	0.913784	24.2014	1.05998	7.09517	0.886031	3.76765
87162455	NP_056044.3	CLUH	clustered mitochondria protein homolog	5	0.997068	4.25286	1.05864	54.0266	0.984428	43.6143
20149621	NP_056348.2	DAK	bifunctional ATP-dependent dihydroxyacetone kinase/FAD-AMP lyase (cyclizing)	4	1.08728	17.2028	1.05767	105.608	0.651918	77.4821
21237783	NP_061184.1	COG1	conserved oligomeric Golgi complex subunit 1	2	0.910327	1.49156	1.0576	11.7151	0.982777	7.3039
21704263	NP_660087.1	MAX	protein max isoform b	2	0.964619	4.81127	1.05732	50.8494	1.26495	56.0996
55770836	NP_057086.2	SCCPDH	saccharopine dehydrogenase-like oxidoreductase	4	1.06935	8.32831	1.0568	348.727	0.875731	268.325
109148508	NP_060140.2	OTUB1	ubiquitin thioesterase OTUB1	2	0.860814	12.1439	1.05652	n/a	0.303226	110.502
32307132	NP_066923.3	NFS1	cysteine desulfurase, mitochondrial isoform a precursor	3	0.896897	6.60645	1.05567	26.4818	0.635793	117.358
7657234	NP_055082.1	C11orf58	small acidic protein	1	3.00497	1112.32	1.05471	6.93926	2.97191	880.367
4826940	NP_005031.1	PRCP	lysosomal Pro-X carboxypeptidase isoform 1 preproprotein	1	0.723233	n/a	1.05417	n/a	0.832688	n/a
259013216	NP_001158355.1	CTNNA2	catenin alpha-2 isoform 2	1	1.18777	n/a	1.05357	n/a	1.01803	n/a
302699211	NP_665739.3	POGZ	pogo transposable element with ZNF domain isoform 3	3	0.994435	6.75538	1.05244	109.541	1.15918	124.905
8394376	NP_058626.1	STX18	syntaxin-18	2	0.749012	n/a	1.0521	n/a	1.11064	n/a
261862348	NP_001159829.1	SHMT2	serine hydroxymethyltransferase, mitochondrial isoform 3	4	0.946976	20.877	1.05097	42.5331	1.16998	36.0798
19913416	NP_570603.2	AP2A1	AP-2 complex subunit alpha-1 isoform 2	4	0.924934	0.984057	1.05055	39.0412	1.04954	33.1311
8923390	NP_060282.1	CHCHD3	coiled-coil-helix-coiled-coil-helix domain-containing protein 3, mitochondrial precursor	6	0.993203	6.80265	1.05034	26.209	0.7822	68.7239
55770844	NP_001894.2	CTNNA1	catenin alpha-1	16	0.937727	7.17106	1.04988	52.825	1.11225	61.3269
118498337	NP_056197.2	HECTD1	E3 ubiquitin-protein ligase HECTD1	1	0.931672	n/a	1.049	n/a	0.955421	n/a
313661408	NP_001186318.1	EPB41L2	band 4.1-like protein 2 isoform c	11	0.943589	10.0743	1.04873	259.393	0.852013	305.375
87299628	NP_683692.2	BOD1L1	biorientation of chromosomes in cell division protein 1-like 1	2	1.05443	19.8264	1.04872	87.528	1.05471	96.8786
261399877	NP_001159757.1	CCT7	T-complex protein 1 subunit eta isoform d	11	0.949375	20.3812	1.04518	78.1299	1.01908	112.256
4503381	NP_001929.1	DR1	protein Dr1	1	1.09685	n/a	1.04517	n/a	1.15114	n/a
14210504	NP_115882.1	AP1M1	AP-1 complex subunit mu-1 isoform 2	1	1.02193	n/a	1.04481	n/a	0.501223	n/a
55956899	NP_000217.2	KRT9	keratin, type I cytoskeletal 9	3	1.09688	23.1326	1.04468	35.9637	1.30599	15.4195
38146094	NP_005472.2	MED16	mediator of RNA polymerase II transcription subunit 16	1	0.493959	n/a	1.04407	n/a	0.370367	n/a
18379366	NP_005848.2	ZMPSTE24	CAAX prenyl protease 1 homolog	3	0.993995	10.5115	1.04387	38.5575	1.01503	27.89
4502395	NP_003757.1	BECN1	beclin-1	1		n/a	1.04322	n/a		n/a
212549555	NP_001131145.1	ILF3	interleukin enhancer-binding factor 3 isoform e	8	0.94238	8.36739	1.03953	176.692	0.748733	115.317
39777597	NP_004604.2	TGM2	protein-glutamine gamma-glutamyltransferase 2 isoform a	7	0.985688	29.5753	1.03943	914.373	0.943984	98.3689
38202214	NP_006355.2	SEC23A	protein transport protein Sec23A	3	1.07374	6.80512	1.03778	n/a	0.245079	937.59
20336746	NP_613075.1	H2AFY	core histone macro-H2A.1 isoform 1	12	0.921369	8.85632	1.03737	76.8872	1.0933	117.865
7662112	NP_055587.1	CTIF	CBP80/20-dependent translation initiation factor isoform 1	1	0.822077	n/a	1.03554	n/a	1.24295	n/a
42741655	NP_000236.2	MET	hepatocyte growth factor receptor isoform b precursor	1	1.48775	n/a	1.035	n/a	1.56794	n/a
194294540	NP_057060.2	SNX7	sorting nexin-7 isoform a	2	1.4244	69.4757	1.03444	10.4124	1.11535	2.44565
22547134	NP_057575.2	MRPL37	39S ribosomal protein L37, mitochondrial	1	1.05948	n/a	1.03391	n/a	1.10225	n/a
5803191	NP_006747.1	TCEA1	transcription elongation factor A protein 1 isoform 1	4	1.06488	26.303	1.0339	88.612	0.963353	95.8968
7524354	NP_039268.1	DDAH2	N(G),N(G)-dimethylarginine dimethylaminohydrolase 2	4	0.918363	9.93191	1.03284	34.7573	0.615194	179.601
110227601	NP_001035994.1	COASY	bifunctional coenzyme A synthase isoform a precursor	1	1.11536	n/a	1.03255	n/a	1.39142	n/a
397739073	NP_001257558.1	MED4	mediator of RNA polymerase II transcription subunit 4 isoform 2	1	1.0724	n/a	1.03215	n/a	0.990156	n/a
89363020	NP_694540.3	NFXL1	NF-X1-type zinc finger protein NFXL1	1	0.880421	n/a	1.03212	n/a	1.05417	n/a
170932494	NP_003560.2	STX7	syntaxin-7	6	0.830059	32.7639	1.03102	91.8125	1.09928	108.137
395132436	NP_001257419.1	RPL18	60S ribosomal protein L18 isoform 2	11	0.960093	9.66507	1.0307	2995.72	1.79903	985.148
98986445	NP_004354.2	CEACAM5	carcinoembryonic antigen-related cell adhesion molecule 5 preproprotein	8	0.80366	24.1956	1.03029	43.4401	1.04541	86.2202
208879470	NP_001129122.1	EEF1E1	eukaryotic translation elongation factor 1 epsilon-1 isoform 2	1	1.68847	n/a	1.02841	n/a	0.698365	n/a
22538792	NP_665858.1	PDCD10	programmed cell death protein 10	2	0.932449	n/a	1.0272	n/a	1.05908	n/a
52630440	NP_036313.3	FKBP8	peptidyl-prolyl cis-trans isomerase FKBP8	2	0.784	n/a	1.02699	n/a	0.933217	n/a
194097330	NP_002106.2	HK3	hexokinase-3	1	0.906963	n/a	1.02563	n/a	1.16007	n/a
4885287	NP_005265.1	GNG5	guanine nucleotide-binding protein G(I)/G(S)/G(O) subunit gamma-5 precursor	1	0.966065	n/a	1.02488	n/a	1.01512	n/a
7305503	NP_038470.1	STOML2	stomatin-like protein 2, mitochondrial	8	1.01823	15.2994	1.02323	13.4592	0.958967	25.7129
217272894	NP_001136077.1	EFTUD2	116 kDa U5 small nuclear ribonucleoprotein component isoform b	7	0.816018	34.8936	1.02211	1608.99	0.179074	435.819
296785054	NP_001171889.1	SH3KBP1	SH3 domain-containing kinase-binding protein 1 isoform c	1	1.03483	n/a	1.02093	n/a	1.5942	n/a
20806097	NP_071896.8	NOC3L	nucleolar complex protein 3 homolog	1	1.09376	n/a	1.02056	n/a	0.744002	n/a
213511012	NP_001132913.1	BCAP31	B-cell receptor-associated protein 31 isoform b	9	0.932406	9.96611	1.02019	58.5933	0.924138	45.8006
408684407	NP_060395.5	DENND4C	DENN domain-containing protein 4C	2	0.965219	16.0583	1.01842	42.9157	1.10133	32.0801
113722133	NP_055861.3	SETX	probable helicase senataxin	1	0.642446	n/a	1.01689	n/a	1.38524	n/a
41281453	NP_055535.2	SLK	STE20-like serine/threonine-protein kinase	7	0.940373	12.4355	1.01654	87.0399	0.998811	97.23
4503363	NP_003850.1	DPM1	dolichol-phosphate mannosyltransferase	1	0.652082	n/a	1.01608	n/a		n/a
4506209	NP_002794.1	PSMC2	26S protease regulatory subunit 7 isoform 1	8	1.08238	9.92174	1.01495	23.9229	0.945571	51.8331
155030196	NP_001093897.1	RAP1GDS1	rap1 GTPase-GDP dissociation stimulator 1 isoform 3	6	0.893166	8.03998	1.0123	n/a	0.996828	n/a
410515404	NP_001258564.1	RQCD1	cell differentiation protein RCD1 homolog isoform 3	2	1.15	n/a	1.00417	n/a	1.31812	n/a
193211480	NP_056175.3	SKIV2L2	superkiller viralicidic activity 2-like 2	2	0.781083	n/a	1.0029	n/a	0.785012	n/a
356461016	NP_001239085.1	GEMIN5	gem-associated protein 5 isoform 2	2	0.783367	n/a	1.00228	n/a	0.775415	n/a
224496106	NP_056338.2	REXO2	oligoribonuclease, mitochondrial precursor	3	0.938483	4.38909	1.0018	36.0594	1.21841	19.8669
401709935	NP_001257906.1	IST1	IST1 homolog isoform d	4	1.00556	18.5701	1.00137	89.0512	0.90386	75.5861
33946327	NP_005076.3	NUP214	nuclear pore complex protein Nup214	1	0.892192	n/a	1.00112	n/a	0.88602	n/a
21389315	NP_005975.1	SLC25A1	tricarboxylate transport protein, mitochondrial isoform a precursor	3	1.01751	10.2848	1.00057	198.322	0.877645	198.486
281182408	NP_001162154.1	TXLNG	gamma-taxilin isoform 2	3	0.890427	7.25683	1.00048	243.823	1.42749	110.449
28416940	NP_057122.2	SBDS	ribosome maturation protein SBDS	3	0.881036	13.5239	0.999555	11.1676	1.00486	2.13198
50086624	NP_291025.3	INTS4	integrator complex subunit 4	1	0.822544	n/a	0.999037	n/a	1.07722	n/a
13236510	NP_077268.1	UBL5	ubiquitin-like protein 5	1	0.974283	n/a	0.997942	n/a	0.949172	n/a
8923224	NP_060194.1	LRRFIP2	leucine-rich repeat flightless-interacting protein 2 isoform 2	3	0.884775	0.945178	0.99773	n/a	0.979126	43.3124
54607077	NP_075392.2	SOWAHC	ankyrin repeat domain-containing protein SOWAHC	2	1.02293	35.555	0.996307	52.468	0.949082	71.1534
30410805	NP_073753.3	CDCP1	CUB domain-containing protein 1 isoform 1 precursor	1	0.40962	n/a	0.993937	n/a		n/a
13569840	NP_054786.2	MACROD1	O-acetyl-ADP-ribose deacetylase MACROD1	1	0.95853	n/a	0.993649	n/a	0.917123	n/a
4507813	NP_003350.1	UGDH	UDP-glucose 6-dehydrogenase isoform 1	12	0.987549	4.38733	0.993532	117.341	0.973225	308.312
5730037	NP_006535.1	EXOC5	exocyst complex component 5	2	0.933829	13.697	0.992444	76.2475	0.857748	87.1175
42476281	NP_003366.2	VDAC2	voltage-dependent anion-selective channel protein 2 isoform 2	6	0.998467	3.6859	0.992346	3.68789	0.980913	30.2663
166197710	NP_056393.2	LSM14A	protein LSM14 homolog A isoform b	1	0.940348	n/a	0.991898	n/a	1.08512	n/a
4885381	NP_005313.1	HIST1H1B	histone H1.5	11	0.952928	7.93843	0.991633	77.7784	1.04508	85.1319
347658920	NP_001231595.1	STX5	syntaxin-5 isoform 2	3	0.939422	n/a	0.990808	n/a	0.924388	n/a
88703043	NP_067072.3	SNX6	sorting nexin-6 isoform a	5	1.02512	5.97109	0.990308	103.118	0.318836	18.735
31083351	NP_009208.2	EXOC3	exocyst complex component 3	2	0.942526	10.5908	0.98996	n/a	1.05255	n/a
4557657	NP_001536.1	ICT1	peptidyl-tRNA hydrolase ICT1, mitochondrial precursor	2	0.886444	38.2352	0.989709	35.3146	0.892152	34.7378
157388904	NP_060272.3	HEATR2	HEAT repeat-containing protein 2	1	0.774204	n/a	0.989311	n/a	1.23366	n/a
336455101	NP_001229605.1	AHCYL1	putative adenosylhomocysteinase 2 isoform b	1	1.02626	23.8902	0.988537	n/a	0.906975	n/a
68509914	NP_000092.2	CYBA	cytochrome b-245 light chain	2	0.813629	0.461102	0.988327	46.6423	0.944809	45.6082
117647226	NP_060289.2	TRMT10C	mitochondrial ribonuclease P protein 1 precursor	2	0.923873	8.90199	0.987903	244.55	0.908806	269.174
154146191	NP_005339.3	HSP90AA1	heat shock protein HSP 90-alpha isoform 2	13	0.967459	10.4351	0.98759	1239.77	1.35931	373.387
295844834	NP_060037.3	NAGK	N-acetyl-D-glucosamine kinase	4	0.974578	11.5707	0.987346	51.4099	0.946553	60.6058
344313155	NP_001230688.1	USP2	ubiquitin carboxyl-terminal hydrolase 2 isoform c	1	1.06289	n/a	0.98716	n/a	1.03566	n/a
397137998	XP_003846672.1	IPO13	importin-13	1	0.93241	n/a	0.986689	n/a	0.935583	n/a
70980549	NP_055791.1	PDCD11	protein RRP5 homolog	5	0.887942	33.2716	0.984085	461.116	2.29876	229.979
46877105	NP_997174.1	USF2	upstream stimulatory factor 2 isoform 2	1	1.09326	n/a	0.981894	n/a	0.922051	n/a
7019415	NP_037468.1	SEC61A1	protein transport protein Sec61 subunit alpha isoform 1	5	0.965516	7.24706	0.980875	31.5512	1.03026	59.2008
27545315	NP_057444.2	TACO1	translational activator of cytochrome c oxidase 1	2	1.21982	n/a	0.980347	n/a	0.590054	n/a
10880134	NP_064647.1	ARRB1	beta-arrestin-1 isoform B	1	1.02043	n/a	0.979894	n/a	1.00838	n/a
27262630	NP_689511.2	NASP	nuclear autoantigenic sperm protein isoform 3	6	1.08845	15.5487	0.979598	84.9859	1.30422	79.671
21264558	NP_068759.2	SMAP1	stromal membrane-associated protein 1 isoform B	2	0.844754	11.0229	0.978541	396.789	0.904435	493.746
68299759	NP_005656.4	EVI5	ecotropic viral integration site 5 protein homolog	1	1.13077	n/a	0.97754	n/a	1.21526	n/a
38373669	NP_004913.2	SEC24C	protein transport protein Sec24C	1	1.03826	n/a	0.977032	n/a		n/a
153251272	NP_001092925.1	CPPED1	calcineurin-like phosphoesterase domain-containing protein 1 isoform b	2	0.943023	4.0334	0.97503	24.3079	1.01781	10.5118
38524622	NP_055848.1	FNBP1	formin-binding protein 1	2	1.03437	22.4446	0.970055	28.2321	0.869344	n/a
38176300	NP_006608.1	NES	nestin	7	0.956988	20.91	0.969201	127.677	2.06814	130.791
4557565	NP_000115.1	ERCC6	DNA excision repair protein ERCC-6	1	0.570467	n/a	0.968424	n/a	1.26782	n/a
93004092	NP_005587.2	NFIB	nuclear factor 1 B-type isoform 3	2	0.790444	51.8662	0.968284	n/a	1.09835	n/a
4758274	NP_004428.1	EPB41	protein 4.1 isoform 6	1	1.00748	n/a	0.967801	n/a	0.868206	n/a
10863955	NP_066977.1	PSAT1	phosphoserine aminotransferase isoform 2	1	0.932441	n/a	0.965898	n/a	0.602403	n/a
62912462	NP_001017364.1	C4BPB	C4b-binding protein beta chain isoform 2 precursor	1	0.950913	n/a	0.96469	n/a	0.928577	n/a
4503253	NP_001335.1	DAD1	dolichyl-diphosphooligosaccharide--protein glycosyltransferase subunit DAD1	3	0.928662	7.35686	0.964455	29.7087	0.962572	31.1924
117190174	NP_004491.2	HNRNPC	heterogeneous nuclear ribonucleoproteins C1/C2 isoform b	9	0.972017	14.8579	0.964351	68.7851	0.957396	89.6988
22748979	NP_689677.1	TMEM199	transmembrane protein 199	1	0.270607	n/a	0.963552	n/a	0.502523	n/a
198041928	NP_640334.2	FGD4	FYVE, RhoGEF and PH domain-containing protein 4	1	1.06622	n/a	0.962744	n/a	0.742587	n/a
209862831	NP_001129487.1	ANXA2	annexin A2 isoform 2	15	0.969987	7.93293	0.962116	88.7507	1.00284	63.659
148491070	NP_001896.2	CTPS1	CTP synthase 1	3	0.90258	2.72088	0.961542	42.3532	0.964085	37.937
221316695	NP_079032.2	MMRN2	multimerin-2 precursor	2	0.850691	31.0861	0.960795	43.1409	0.615648	127.643
24497605	NP_057637.2	NUP62	nuclear pore glycoprotein p62	3	0.945725	0.420742	0.959647	34.3455	0.932086	25.6227
7705753	NP_057075.1	C1QA	complement C1q subcomponent subunit A precursor	1	1.06398	n/a	0.958828	n/a	0.871133	n/a
6005890	NP_009039.1	TCEB2	transcription elongation factor B polypeptide 2 isoform a	1	0.929555	n/a	0.95875	n/a	0.739033	n/a
341604768	NP_001230059.1	RPL13	60S ribosomal protein L13 isoform 2	6	0.999149	6.27446	0.95647	1446.78	1.05168	5126.47
4504897	NP_002257.1	KPNA2	importin subunit alpha-2	1	0.439111	n/a	0.9561	n/a	1.43646	n/a
302191611	NP_001180499.1	CSRP1	cysteine and glycine-rich protein 1 isoform 3	3	0.957537	14.0485	0.955703	707.683	0.723149	1390.6
15011918	NP_005756.2	ATP6AP2	renin receptor precursor	1	0.944215	n/a	0.955485	n/a	0.954804	n/a
23308751	NP_689953.1	HIBADH	3-hydroxyisobutyrate dehydrogenase, mitochondrial precursor	2	0.964861	n/a	0.954171	n/a	1.13906	n/a
357933604	NP_001239542.1	ZNF638	zinc finger protein 638 isoform 2	3	0.449663	n/a	0.953775	n/a	0.870206	n/a
48255891	NP_001001329.1	PRKCSH	glucosidase 2 subunit beta isoform 2 precursor	12	0.95045	10.2491	0.953552	30.8755	0.917547	22.8362
30089966	NP_659494.2	CDC42EP5	cdc42 effector protein 5	2	0.717435	66.3353	0.952772	n/a	0.890088	n/a
24308295	NP_079472.1	GRPEL1	grpE protein homolog 1, mitochondrial precursor	1	0.933344	n/a	0.952651	n/a	0.951306	n/a
17921987	NP_004367.2	COX15	cytochrome c oxidase assembly protein COX15 homolog isoform 2	1	1.17398	n/a	0.950703	n/a	0.796763	n/a
47717134	NP_003984.2	CLK2	dual specificity protein kinase CLK2	1	1.65072	n/a	0.950069	n/a	1.87663	n/a
321267522	NP_001189433.1	CTDP1	RNA polymerase II subunit A C-terminal domain phosphatase isoform 3	1	0.860947	n/a	0.949526	n/a	0.899403	n/a
4758556	NP_004689.1	PRPF3	U4/U6 small nuclear ribonucleoprotein Prp3	3	0.979608	38.0681	0.947672	38.5546	0.870448	21.3221
4503509	NP_003741.1	EIF3A	eukaryotic translation initiation factor 3 subunit A	9	0.984991	9.27466	0.945816	87.8284	1.08487	112.335
5031597	NP_005710.1	ARPC3	actin-related protein 2/3 complex subunit 3	1	0.823625	n/a	0.945776	n/a	0.993079	n/a
5803181	NP_006810.1	STIP1	stress-induced-phosphoprotein 1	3	0.875681	20.1285	0.945577	119.173	0.919585	99.072
24432056	NP_653272.2	FAM109A	sesquipedalian-1 isoform 2	1	1.0448	n/a	0.945379	n/a	1.15016	n/a
153070262	NP_005579.2	MEP1A	meprin A subunit alpha precursor	3	0.796292	17.7172	0.943741	4.94734	0.65477	31.6269
189491675	NP_116211.2	FAM136A	protein FAM136A	2	0.694479	69.9815	0.941916	104.331	0.602757	97.3498
212276104	NP_001131025.1	LRRFIP1	leucine-rich repeat flightless-interacting protein 1 isoform 5	3	0.776296	16.5931	0.941732	9.62005	0.902222	16.3809
383792154	NP_001244305.1	SCFD1	sec1 family domain-containing protein 1 isoform c	1	0.830427	n/a	0.941293	n/a	0.968112	n/a
24111250	NP_006563.2	GNA13	guanine nucleotide-binding protein subunit alpha-13	2	0.864618	21.0802	0.94115	32.9659	0.825065	41.4263
100816392	NP_003925.1	FUBP3	far upstream element-binding protein 3	1	0.90798	n/a	0.939779	n/a	0.954887	n/a
229577398	NP_001153239.1	BZW2	basic leucine zipper and W2 domain-containing protein 2	7	0.943818	7.5697	0.938102	193.342	0.844349	223.414
223468595	NP_001138471.1	ITGAV	integrin alpha-V isoform 2 precursor	2	0.882918	n/a	0.937917	n/a	0.950846	n/a
4505939	NP_000928.1	POLR2A	DNA-directed RNA polymerase II subunit RPB1	4	0.974486	4.38204	0.937213	87.1424	1.60749	n/a
11545912	NP_071445.1	NOD2	nucleotide-binding oligomerization domain-containing protein 2	1	0.949698	n/a	0.937148	n/a	1.02503	n/a
12667788	NP_002464.1	MYH9	myosin-9	70	0.938564	11.3637	0.934633	110.22	0.98221	150.226
151101337	NP_653210.2	CCDC43	coiled-coil domain-containing protein 43 isoform 1	1	1.09774	n/a	0.934134	n/a	1.37559	n/a
189491744	NP_001121631.1	VPS53	vacuolar protein sorting-associated protein 53 homolog isoform 1	4	0.949078	1.05134	0.934055	69.4922	0.878081	25.4607
9910394	NP_064517.1	AGPAT3	1-acyl-sn-glycerol-3-phosphate acyltransferase gamma	1	1.00394	n/a	0.931454	n/a	0.986803	n/a
260593665	NP_001159529.1	PEPD	xaa-Pro dipeptidase isoform 3	5	1.02551	35.8501	0.931414	88.541	0.979309	58.6375
21735580	NP_663160.1	OSBPL3	oxysterol-binding protein-related protein 3 isoform b	1	0.547109	n/a	0.930543	n/a	1.20239	n/a
27734709	NP_775885.1	NOMO2	nodal modulator 2 isoform 2 precursor	8	0.973655	7.63765	0.930001	120.378	0.877656	25.395
4507725	NP_000362.1	TTR	transthyretin precursor	1	0.895959	6.05788	0.929977	14.7891	0.845987	11.6141
95113651	NP_006532.2	GLRX3	glutaredoxin-3	2	0.671474	25.023	0.929664	35.691	1.01874	n/a
327315343	NP_001192157.1	SORT1	sortilin isoform 2	1	0.923862	n/a	0.929276	n/a	0.976912	n/a
94536771	NP_001035521.1	COA3	cytochrome c oxidase assembly protein 3 homolog, mitochondrial	2	0.770402	n/a	0.92763	n/a	0.819452	n/a
7661730	NP_054737.1	MRPS28	28S ribosomal protein S28, mitochondrial	1	1.00316	n/a	0.926411	n/a	0.476593	n/a
325197191	NP_001191445.1	KIFAP3	kinesin-associated protein 3 isoform 3	1	1.3214	n/a	0.924481	n/a	0.709873	n/a
422398896	NP_001258717.1	DYNC1I2	cytoplasmic dynein 1 intermediate chain 2 isoform 3	4	0.985109	7.2166	0.924363	78.8048	1.23793	30.1394
23510451	NP_001631.3	APEH	acylamino-acid-releasing enzyme	5	1.0706	28.4616	0.924293	19.8532	0.902713	2.55032
13129044	NP_076970.1	PDCL3	phosducin-like protein 3	2	0.424602	n/a	0.924252	n/a	1.88359	n/a
119393876	NP_075043.1	NAIP	baculoviral IAP repeat-containing protein 1 isoform 2	1	1.10563	n/a	0.923855	n/a	0.425612	n/a
58530840	NP_004406.2	DSP	desmoplakin isoform I	55	0.957688	12.4392	0.923555	58.2393	0.911674	69.8829
151108473	NP_057152.2	FIS1	mitochondrial fission 1 protein	2	0.924622	2.91587	0.922096	2.46972	0.647596	28.2732
157502193	NP_002808.3	PSMD13	26S proteasome non-ATPase regulatory subunit 13 isoform 1	4	0.960569	7.74256	0.921062	19.3999	0.810434	43.4127
31711992	NP_001922.2	DLAT	dihydrolipoyllysine-residue acetyltransferase component of pyruvate dehydrogenase complex, mitochondrial precursor	3	0.955389	9.28571	0.920796	9.59147	0.854112	12.6101
7661714	NP_055703.1	FAM3C	protein FAM3C precursor	3	0.971216	18.7708	0.918754	0.886723	0.929061	4.61941
41327771	NP_004809.2	DDX23	probable ATP-dependent RNA helicase DDX23	3	0.914559	17.3605	0.918688	21.1751	0.698396	65.7094
148277031	NP_001091103.1	GCNT1	beta-1,3-galactosyl-O-glycosyl-glycoprotein beta-1,6-N-acetylglucosaminyltransferase	1	0.745574	n/a	0.917752	n/a	0.774394	n/a
28558973	NP_004220.2	MED14	mediator of RNA polymerase II transcription subunit 14	2		n/a	0.917213	n/a	1.3446	n/a
62241042	NP_004437.2	EPRS	bifunctional glutamate/proline--tRNA ligase	12	0.946552	12.3384	0.916261	60.6747	0.889585	57.1644
71772942	NP_001119.3	AP1G1	AP-1 complex subunit gamma-1 isoform b	7	0.986928	11.6358	0.915157	41.8299	0.728691	115.357
190194386	NP_064508.3	TM9SF3	transmembrane 9 superfamily member 3 precursor	3	1.02678	2.33391	0.912435	43.4119	0.810409	30.2641
15149476	NP_002878.2	RARS	arginine--tRNA ligase, cytoplasmic	12	0.892467	37.2633	0.911822	258.284	1.14506	536.347
29826282	NP_817092.1	PPM1G	protein phosphatase 1G	5	1.03014	1.64817	0.910908	90.0029	1.01638	93.859
46852147	NP_060530.3	IARS2	isoleucine--tRNA ligase, mitochondrial precursor	6	1.01109	11.8082	0.91081	55.5156	0.989197	91.6648
114155142	NP_003283.2	TPR	nucleoprotein TPR	18	1.03651	13.1363	0.910566	60.8419	0.899014	98.3552
56790930	NP_004425.2	EML1	echinoderm microtubule-associated protein-like 1 isoform b	3	0.814882	25	0.909478	147.233	0.961142	111.129
4758384	NP_004108.1	FKBP5	peptidyl-prolyl cis-trans isomerase FKBP5 isoform 1	4	0.935789	3.60376	0.909456	37.1735	0.916539	35.038
46094014	NP_060564.2	GSPT2	eukaryotic peptide chain release factor GTP-binding subunit ERF3B	1	0.928354	n/a	0.908013	n/a	0.79997	n/a
6715600	NP_002069.2	GOLGA4	Golgin subfamily A member 4 isoform 2	10	1.30524	67.9845	0.906594	54.1205	0.876932	47.2033
118918403	NP_055995.4	SYNE2	nesprin-2 isoform 1	14	0.827726	25.653	0.906348	107.536	0.922622	52.7832
4504287	NP_003523.1	HIST1H3E	histone H3.1	2	1.09784	20.2218	0.90531	329.097	1.02028	210.004
114842410	NP_055642.3	ZC3H11A	zinc finger CCCH domain-containing protein 11A	2	2.38123	n/a	0.904765	n/a	1.13496	n/a
10800144	NP_066544.1	HIST1H2AJ	histone cluster 1, H2aj	1	0.475202	n/a	0.904565	n/a	0.428228	n/a
339276002	NP_079255.4	MCF2L	guanine nucleotide exchange factor DBS isoform b precursor	1	1.06453	n/a	0.904507	n/a	0.880668	n/a
63055043	NP_940938.1	TMEM205	transmembrane protein 205	1	0.736187	31.2211	0.904319	n/a	0.869037	n/a
343887344	NP_001230574.1	CFL2	cofilin-2 isoform 2	1	0.931815	n/a	0.903223	n/a	0.865225	n/a
223942035	NP_001138750.1	NECAP2	adaptin ear-binding coat-associated protein 2 isoform 3	2	1.11378	11.3816	0.902849	n/a	0.891657	n/a
37620194	NP_932332.1	GNPNAT1	glucosamine 6-phosphate N-acetyltransferase	3	1.1516	n/a	0.901188	34.7308	1.58622	n/a
194394146	NP_631898.3	DPP9	dipeptidyl peptidase 9	1	1.14218	n/a	0.901124	n/a	0.78874	n/a
4758874	NP_004791.1	TM9SF2	transmembrane 9 superfamily member 2 precursor	4	0.911703	19.0221	0.900621	93.6835	0.672486	60.2202
7657069	NP_055399.1	ERO1L	ERO1-like protein alpha precursor	4	1.04059	7.33441	0.900591	55.3354	0.668251	54.095
338827720	NP_001229774.1	RNF146	E3 ubiquitin-protein ligase RNF146 isoform a	1	1.00636	n/a	0.900476	n/a	0.986339	n/a
372266129	NP_001243194.1	FLII	protein flightless-1 homolog isoform 3	4	0.969482	11.3743	0.900144	94.4893	1.00768	114.683
14702162	NP_115797.1	CLIP2	CAP-Gly domain-containing linker protein 2 isoform 2	2	1.33603	8.17545	0.898764	57.3826	1.20539	61.8507
73611906	NP_001027005.1	PHKB	phosphorylase b kinase regulatory subunit beta isoform b	1	0.877623	n/a	0.898555	n/a	0.932122	n/a
50234889	NP_940892.1	RAB43	ras-related protein Rab-43 isoform a	1	0.732161	n/a	0.897703	n/a	1.14446	n/a
270265908	NP_001161694.1	TBC1D17	TBC1 domain family member 17 isoform 2	1	0.884609	n/a	0.897641	n/a	0.771577	n/a
4503987	NP_003869.1	GGH	gamma-glutamyl hydrolase precursor	1	0.813862	n/a	0.897582	n/a	0.660378	n/a
406719590	NP_001258358.1	EMC1	ER membrane protein complex subunit 1 isoform 4 precursor	2	0.257573	n/a	0.897487	8.3132	0.902331	23.4087
281604151	NP_612642.2	PGAM5	serine/threonine-protein phosphatase PGAM5, mitochondrial isoform 3	1	0.97397	n/a	0.896886	n/a	0.93149	n/a
126012571	NP_005520.4	HSPG2	basement membrane-specific heparan sulfate proteoglycan core protein precursor	8	0.929871	7.58545	0.896472	483.248	0.797079	487.016
109633028	NP_001035918.1	MST4	serine/threonine-protein kinase MST4 isoform 2	3	0.689606	21.269	0.895486	97.823	0.575812	158.782
23111062	NP_004583.2	SFSWAP	splicing factor, suppressor of white-apricot homolog isoform 2	2	1.1459	45.6995	0.894851	168.886	1.06333	120.873
194394165	NP_079204.2	OBFC1	CST complex subunit STN1	1	1.12129	n/a	0.894504	n/a	0.800519	n/a
15451775	NP_150249.1	PML	protein PML isoform 7	6	0.959913	5.10639	0.893929	45.5504	0.835099	80.2477
24308263	NP_067045.1	PRUNE	protein prune homolog	3	0.868685	18.2961	0.893204	n/a	0.40109	n/a
6005794	NP_009144.1	PRAF2	PRA1 family protein 2	1	0.826221	n/a	0.893042	n/a	0.858438	n/a
17105394	NP_000975.2	RPL23A	60S ribosomal protein L23a	6	0.933182	7.51597	0.891032	52.7354	0.80885	39.9428
4557305	NP_000025.1	ALDOA	fructose-bisphosphate aldolase A isoform 1	21	0.928197	6.88425	0.890665	80.8426	0.921575	74.5398
21361380	NP_009172.2	SNF8	vacuolar-sorting protein SNF8	3	0.934928	9.14531	0.889599	41.119	0.775676	37.464
94681046	NP_064569.3	CNNM4	metal transporter CNNM4 precursor	1	1.08104	n/a	0.886599	n/a	0.83207	n/a
350994425	NP_001234919.1	CTAGE5	cTAGE family member 5 isoform 7	1	0.985552	n/a	0.886135	n/a	0.84116	n/a
41350333	NP_005984.3	TBCD	tubulin-specific chaperone D	4	0.783674	27.3247	0.885702	5.28266	1.05327	13.7706
30260188	NP_005104.2	GOLGA5	Golgin subfamily A member 5	3	1.3195	27.1243	0.884594	83.1255	0.53422	63.2913
14251209	NP_001279.2	CLIC1	chloride intracellular channel protein 1	14	0.989688	6.76738	0.88409	227.552	0.585943	161.255
55769589	NP_060896.1	TMEM63B	transmembrane protein 63B	1	1.54346	n/a	0.883931	n/a	1.08104	n/a
19923193	NP_003923.2	ST13	hsc70-interacting protein	5	0.92302	13.9464	0.88341	47.1499	0.853253	36.6055
206725422	NP_001128686.1	GIT2	ARF GTPase-activating protein GIT2 isoform 5	4	0.911863	2.14355	0.88321	65.2864	0.962764	58.6884
19913441	NP_002140.2	HPCAL1	hippocalcin-like protein 1	2	1.09	12.5449	0.882139	26.2742	1.18885	8.03288
338753429	NP_001229724.1	NUP93	nuclear pore complex protein Nup93 isoform 2	8	0.97347	30.1008	0.882003	175.311	1.66273	155.007
21361565	NP_001679.2	ATP5F1	ATP synthase subunit b, mitochondrial precursor	3	0.967008	4.06895	0.881916	51.6997	0.807312	70.5763
29550838	NP_057632.2	GOLM1	Golgi membrane protein 1	7	0.985295	9.86312	0.881906	57.3283	1.01831	82.5986
5454166	NP_006361.1	VTI1B	vesicle transport through interaction with t-SNAREs homolog 1B	2	0.948239	9.20926	0.880479	79.2456	0.957095	92.2151
102469694	NP_002299.2	LGALS9	galectin-9 isoform short	1	1.20728	61.8446	0.880308	2.18096	0.986535	57.9005
110349763	NP_059430.2	CYTH1	cytohesin-1 isoform 2	1	1.49601	n/a	0.879796	n/a	0.717714	n/a
33859837	NP_892117.1	RPP38	ribonuclease P protein subunit p38	1		n/a	0.87951	n/a	0.528391	n/a
13540594	NP_110432.1	LMAN2L	VIP36-like protein isoform 2 precursor	1	0.901252	n/a	0.879289	n/a	0.796457	n/a
162329583	NP_008938.2	CPSF6	cleavage and polyadenylation specificity factor subunit 6	1	1.85424	85.7348	0.879016	80.4057	0.624001	27.4941
4504079	NP_003792.1	GPAA1	glycosylphosphatidylinositol anchor attachment 1 protein	1	1.00252	n/a	0.878262	n/a	0.460637	n/a
116734849	NP_000636.2	AGL	glycogen debranching enzyme isoform 2	1	1.06079	n/a	0.878084	n/a	0.779622	n/a
188497750	NP_277035.2	HK1	hexokinase-1 isoform HKI-td	12	0.913103	10.73	0.877472	135.589	0.811744	100.307
345842414	NP_001230904.1	PPP3CC	serine/threonine-protein phosphatase 2B catalytic subunit gamma isoform isoform 3	1	1.24227	n/a	0.875716	n/a	0.787546	n/a
24797086	NP_002262.3	IPO5	importin-5	6	0.877633	7.03989	0.874571	82.4637	0.865525	81.6356
373432682	NP_001243285.1	UBE2L3	ubiquitin-conjugating enzyme E2 L3 isoform 3	1	0.70402	n/a	0.874139	n/a	0.687046	n/a
4506711	NP_001021.1	RPS27	40S ribosomal protein S27	1	0.979915	n/a	0.873819	n/a	0.865285	n/a
39725636	NP_059980.2	TMED9	transmembrane emp24 domain-containing protein 9 precursor	4	0.962599	9.67789	0.87287	58.0205	1.03526	77.336
5031973	NP_005733.1	PDIA6	protein disulfide-isomerase A6 precursor	9	0.877705	15.6799	0.872553	37.4222	0.84262	127.831
18643383	NP_079470.1	ITPKC	inositol-trisphosphate 3-kinase C	1	0.648444	n/a	0.87225	n/a	0.79598	n/a
38045896	NP_829883.1	ERC1	ELKS/Rab6-interacting/CAST family member 1 isoform delta	6	1.45975	68.3459	0.871794	47.1405	1.42321	106.658
15150811	NP_150597.1	MRPS36	28S ribosomal protein S36, mitochondrial	1	0.869209	n/a	0.871207	n/a	0.824428	n/a
5803187	NP_006746.1	TALDO1	transaldolase	15	0.995809	11.1819	0.871058	172.559	1.01711	175.275
374088170	NP_001243342.1	HVCN1	voltage-gated hydrogen channel 1 isoform 2	1	0.936842	n/a	0.871038	n/a	0.751386	n/a
188528901	NP_001120868.1	STXBP2	syntaxin-binding protein 2 isoform b	2	1.18185	27.8157	0.870095	57.3551	0.939284	79.5777
4505941	NP_000929.1	POLR2B	DNA-directed RNA polymerase II subunit RPB2	1	0.841053	n/a	0.869314	n/a	0.917785	n/a
17978481	NP_536338.1	VPS16	vacuolar protein sorting-associated protein 16 homolog isoform 3	1	1.26338	16.6984	0.868118	n/a	0.955876	n/a
238859557	NP_002909.4	RFX1	MHC class II regulatory factor RFX1	1	0.804799	n/a	0.867005	n/a	0.674922	n/a
166706903	NP_002044.2	GBP1	interferon-induced guanylate-binding protein 1	5	0.905029	13.5383	0.865672	66.1044	0.865084	66.4732
15826852	NP_073572.2	ACBD3	Golgi resident protein GCP60	2	0.95268	5.85791	0.865554	3.02549	0.535072	64.7148
38201625	NP_937885.1	EIF4G1	eukaryotic translation initiation factor 4 gamma 1 isoform 3	6	1.00333	4.58864	0.864693	23.7235	0.940376	36.3245
45545437	NP_996531.1	CLYBL	citrate lyase subunit beta-like protein, mitochondrial precursor	1	1.04047	n/a	0.86461	n/a	0.826429	n/a
426214085	NP_001258762.1	DENND2D	DENN domain-containing protein 2D isoform b	1	0.985458	n/a	0.864301	n/a	0.902138	n/a
19923830	NP_065385.2	PBXIP1	pre-B-cell leukemia transcription factor-interacting protein 1	3	0.975895	26.0902	0.86055	49.4976	0.873106	40.3913
4557831	NP_000272.1	PCBD1	pterin-4-alpha-carbinolamine dehydratase precursor	1	0.722954	8.65645	0.859652	32.9906	1.37592	27.479
226437577	NP_001139805.1	SUMF2	sulfatase-modifying factor 2 isoform g	1	0.919283	n/a	0.857952	n/a	0.961503	n/a
300934782	NP_001177957.2	TNPO3	transportin-3 isoform 2	2	0.770611	n/a	0.857581	n/a	0.676077	n/a
5031857	NP_005557.1	LDHA	L-lactate dehydrogenase A chain isoform 1	7	0.970539	4.0416	0.856709	18.8791	0.88308	31.392
7657134	NP_055051.1	GNPAT	dihydroxyacetone phosphate acyltransferase	2	1.23557	n/a	0.856696	n/a	0.949855	n/a
4504151	NP_002078.1	GRN	granulins precursor	1	1.00144	n/a	0.856094	n/a		n/a
55956779	NP_001007101.1	SCP2	non-specific lipid-transfer protein isoform 4 proprotein	4	0.932409	8.81456	0.855899	41.5956	0.88767	16.2134
297374789	NP_001172010.1	FMR1	fragile X mental retardation protein 1 isoform ISO12	2	0.577137	128.986	0.855774	71.9209	0.811108	58.5597
218931253	NP_001136408.1	DAGLB	sn1-specific diacylglycerol lipase beta isoform 2	1	1.96541	n/a	0.855177	n/a	1.40059	n/a
217416350	NP_001136115.1	CASKIN2	caskin-2 isoform b	1	1.1676	n/a	0.854876	n/a	0.973822	n/a
11968182	NP_072045.1	RPS18	40S ribosomal protein S18	6	0.964383	5.14099	0.854854	97.9687	1.01205	131.146
15055537	NP_008929.2	SCGN	secretagogin	1	1.06336	n/a	0.854055	n/a		n/a
45387945	NP_065779.1	ESYT2	extended synaptotagmin-2	4	0.884878	5.07215	0.853217	65.4755	0.802621	75.2552
5803023	NP_006807.1	LMAN2	vesicular integral-membrane protein VIP36 precursor	6	0.966464	18.6767	0.85299	68.0184	1.31839	19.3087
4557499	NP_001320.1	CTBP2	C-terminal-binding protein 2 isoform 1	1	1.83416	n/a	0.852716	n/a	0.775581	n/a
5453980	NP_006251.1	DNAJC3	dnaJ homolog subfamily C member 3 precursor	5	1.13193	8.37512	0.852605	11.4126	0.716287	9.63688
194688149	NP_001124164.1	PPP3CA	serine/threonine-protein phosphatase 2B catalytic subunit alpha isoform isoform 3	5	1.11941	18.0161	0.851794	41.9508	0.684799	37.6701
223555975	NP_001138632.1	TPM4	tropomyosin alpha-4 chain isoform 1	4	0.972481	23.6034	0.851588	50.8408	0.826012	78.9173
78000156	NP_056451.3	EIF2B4	translation initiation factor eIF-2B subunit delta isoform 3	1	0.892812	7.96855	0.849791	22.1103	0.781764	17.4376
47086907	NP_060309.2	LPCAT2	lysophosphatidylcholine acyltransferase 2	5	0.941673	11.2169	0.848968	15.0024	0.983725	29.667
11342680	NP_005726.1	ACTR1B	beta-centractin	2	0.892797	n/a	0.847425	n/a	0.796738	n/a
4503015	NP_003900.1	CPNE3	copine-3	4	1.05625	10.2484	0.846853	175.469	0.887494	139.591
13569962	NP_112243.1	RAB1B	ras-related protein Rab-1B	4	0.926075	23.6259	0.8464	23.4873	0.937268	32.9488
71565154	NP_000662.3	ADH5	alcohol dehydrogenase class-3	7	0.869545	9.43388	0.846084	125.609	0.573064	220.463
40068518	NP_002622.2	PGD	6-phosphogluconate dehydrogenase, decarboxylating	8	0.991675	17.5092	0.845215	38.3848	0.988132	73.7894
4504447	NP_002128.1	HNRNPA2B1	heterogeneous nuclear ribonucleoproteins A2/B1 isoform A2	4	0.913765	4.8999	0.844117	82.9426	0.771445	85.9202
10092601	NP_003751.2	EIF4G3	eukaryotic translation initiation factor 4 gamma 3 isoform 3	1	0.855326	n/a	0.844043	n/a	0.338936	n/a
225903439	NP_001139632.1	TATDN1	putative deoxyribonuclease TATDN1 isoform b	1		n/a	0.843885	n/a	0.518656	n/a
15718702	NP_203126.1	CASP7	caspase-7 isoform beta	1	0.781974	n/a	0.843858	n/a	0.671544	n/a
4501939	NP_000663.1	ADH6	alcohol dehydrogenase 6 isoform 2	3	1.03763	7.81964	0.843818	10.0857	0.733234	30.8265
56243590	NP_060853.3	WDR33	pre-mRNA 3' end processing protein WDR33 isoform 1	2	1.17951	21.22	0.843699	17.3019	0.690837	34.7387
119964726	NP_000867.2	IGF2R	cation-independent mannose-6-phosphate receptor precursor	6	1.23054	26.5328	0.843678	50.1739	0.798144	34.2472
38569423	NP_942127.1	ACLY	ATP-citrate synthase isoform 2	7	0.963747	3.83619	0.842639	352.046	1.17019	148.24
240849567	NP_001154992.1	COG5	conserved oligomeric Golgi complex subunit 5 isoform 3	1	1.17406	n/a	0.841825	n/a	0.420773	n/a
24307969	NP_055423.1	CYFIP1	cytoplasmic FMR1-interacting protein 1 isoform a	5	1.0584	6.04355	0.839686	90.7705	0.870883	66.892
4557032	NP_002291.1	LDHB	L-lactate dehydrogenase B chain	7	0.978782	1.90624	0.839174	60.7508	0.75592	84.0935
24431933	NP_722550.1	RTN4	reticulon-4 isoform B	5	0.913395	14.2511	0.837239	33.2776	1.07066	26.7417
194097352	NP_001123477.1	ACTN1	alpha-actinin-1 isoform c	10	0.930589	13.5153	0.836856	66.7663	0.783252	56.0782
81295404	NP_001028755.2	ACOT9	acyl-coenzyme A thioesterase 9, mitochondrial isoform b precursor	1	1.01621	n/a	0.835556	n/a	0.724772	n/a
38788333	NP_057662.3	RSF1	remodeling and spacing factor 1	1	0.950609	n/a	0.834578	n/a	0.781194	n/a
20149635	NP_057227.2	NSFL1C	NSFL1 cofactor p47 isoform a	4	0.963752	n/a	0.833376	n/a	0.821245	n/a
24308207	NP_065761.1	LRRC47	leucine-rich repeat-containing protein 47	6	1.01723	2.82449	0.833334	107.127	1.48177	25.8894
4506625	NP_000981.1	RPL27A	60S ribosomal protein L27a	3	0.976805	7.57214	0.832892	24.467	0.76634	22.6849
4505257	NP_002435.1	MSN	moesin	15	0.965323	8.18957	0.831866	36.982	0.787945	44.1473
4758112	NP_004631.1	DDX39B	spliceosome RNA helicase DDX39B	1	3.03955	1083.34	0.830939	18.6237	3.08296	871.092
4758876	NP_004634.1	PABPN1	polyadenylate-binding protein 2	1	0.739443	n/a	0.830364	n/a	0.961739	n/a
164519146	NP_060130.3	GATAD2A	transcriptional repressor p66-alpha	3	1.09706	23.8479	0.830329	26.9619	1.80987	23.7078
288856248	NP_001165780.1	NEXN	nexilin isoform 2	1	0.909048	n/a	0.830062	n/a	0.847622	n/a
5453908	NP_006215.1	PITPNA	phosphatidylinositol transfer protein alpha isoform	1	1.25724	n/a	0.829061	n/a	1.36951	n/a
345842445	NP_001230914.1	RELA	transcription factor p65 isoform 4	3	0.912831	1.39775	0.826497	3.52593	0.842462	20.8063
29171730	NP_803882.1	CYP20A1	cytochrome P450 20A1	3	0.855925	20.78	0.826164	49.5989	1.08269	94.8132
338827663	NP_001229761.1	ARFGAP2	ADP-ribosylation factor GTPase-activating protein 2 isoform 2	2		n/a	0.825791	n/a	1.54754	n/a
68303549	NP_001020117.1	ASL	argininosuccinate lyase isoform 3	5	1.02665	12.7125	0.825713	603.444	0.771921	286.954
4505087	NP_002361.1	MAGOH	protein mago nashi homolog	2	0.933036	4.24724	0.825661	1.55329	0.918508	24.6119
259013537	NP_001158503.1	DTYMK	thymidylate kinase isoform 2	2	1.4078	147.496	0.825636	419.504	0.403461	175.961
338827763	NP_001229791.1	PRKACB	cAMP-dependent protein kinase catalytic subunit beta isoform 9	4	0.922519	24.971	0.824773	12.0386	0.740987	37.9365
6912482	NP_036450.1	LETM1	LETM1 and EF-hand domain-containing protein 1, mitochondrial precursor	6	0.965852	16.4426	0.824296	12.2132	0.649774	0.607896
30089919	NP_835237.1	POLDIP3	polymerase delta-interacting protein 3 isoform 2	1	0.815753	n/a	0.823592	n/a	1.04035	n/a
284807150	NP_001165282.1	GBA	glucosylceramidase isoform 2	1	0.949595	n/a	0.822518	n/a	0.77192	n/a
4506691	NP_001011.1	RPS16	40S ribosomal protein S16	2	1.05937	6.29651	0.820842	173.785	0.848101	172.278
17402900	NP_003893.2	FUBP1	far upstream element-binding protein 1	11	0.967668	18.8841	0.820791	133.419	0.774097	128.133
62530388	NP_001014990.1	MRPL22	39S ribosomal protein L22, mitochondrial isoform b	1	0.800066	n/a	0.819708	n/a	0.805723	n/a
82659109	NP_065816.2	UBR4	E3 ubiquitin-protein ligase UBR4	7	0.917614	23.4812	0.819283	4.76167	0.71384	41.1785
19923483	NP_057406.2	RAB14	ras-related protein Rab-14	3	0.944764	4.83616	0.819089	13.1287	0.830786	6.10781
344925834	NP_001230710.1	FAM213A	redox-regulatory protein FAM213A isoform 2 precursor	1	0.96075	n/a	0.818851	n/a	0.905938	n/a
349585060	NP_001231800.1	DAB2	disabled homolog 2 isoform 2	2	1.04432	n/a	0.817954	n/a	0.859144	n/a
55770888	NP_003557.2	EEA1	early endosome antigen 1	26	0.957818	16.4748	0.817381	100.56	0.804363	85.5685
30089940	NP_005886.2	GOLGA3	Golgin subfamily A member 3 isoform 1	13	0.900624	24.4642	0.817307	44.237	0.664911	42.0151
4507021	NP_000333.1	SLC4A1	band 3 anion transport protein	3	0.874512	19.9621	0.816964	17.4374	0.666017	17.7611
42542394	NP_005759.4	LPCAT3	lysophospholipid acyltransferase 5	4	1.03042	n/a	0.816254	n/a	0.797483	n/a
20149598	NP_036272.2	SLC25A10	mitochondrial dicarboxylate carrier isoform 2	1	0.955412	n/a	0.816056	n/a	0.780204	n/a
154355000	NP_003676.2	KHSRP	far upstream element-binding protein 2	11	0.953262	6.92264	0.814897	103.868	0.81223	122.629
256222019	NP_057215.3	RAB10	ras-related protein Rab-10	2	1.12581	14.0861	0.814432	26.5177	0.792219	12.0671
7262393	NP_000024.2	ABCD1	ATP-binding cassette sub-family D member 1	1	0.994285	n/a	0.814183	n/a	0.898472	n/a
338797810	NP_001229754.1	FDPS	farnesyl pyrophosphate synthase isoform c	2	0.955885	6.34725	0.814083	3.86018	0.756601	108.176
94721261	NP_149124.3	CNP	2',3'-cyclic-nucleotide 3'-phosphodiesterase	3	0.842818	28.0053	0.813036	192.875	0.715822	273.558
32528306	NP_002904.3	RFC1	replication factor C subunit 1 isoform 1	1	0.733828	n/a	0.813035	n/a	0.58456	n/a
21614544	NP_002955.2	S100A8	protein S100-A8	1	0.905816	n/a	0.812749	n/a	0.757598	n/a
42794779	NP_976063.1	MYO18A	unconventional myosin-XVIIIa isoform b	5	1.09091	12.8874	0.81253	32.9649	0.742283	38.8024
4758256	NP_004085.1	EIF2S1	eukaryotic translation initiation factor 2 subunit 1	3	0.864573	17.0619	0.812437	48.2978	0.788447	53.2493
4557367	NP_000377.1	BLMH	bleomycin hydrolase	3	1.04503	5.42713	0.811808	46.583	0.876469	26.9079
150456451	NP_060264.3	FOCAD	focadhesin	2	1.06545	5.57756	0.811096	n/a	0.734148	4.64651
13273311	NP_056042.1	POFUT2	GDP-fucose protein O-fucosyltransferase 2 isoform A precursor	1	1.07222	n/a	0.810981	n/a	0.763774	n/a
24308201	NP_065392.1	APMAP	adipocyte plasma membrane-associated protein	4	0.874638	46.823	0.810252	67.407	0.785255	72.045
47458820	NP_998827.1	STAT3	signal transducer and activator of transcription 3 isoform 3	3	0.833403	1.52684	0.810111	25.9938	0.927143	0.578695
283806705	NP_001164608.1	STRBP	spermatid perinuclear RNA-binding protein isoform 2	3	0.871314	18.3908	0.808404	63.2108	0.810733	67.6644
194018522	NP_001123479.1	GSPT1	eukaryotic peptide chain release factor GTP-binding subunit ERF3A isoform 3	3	0.962688	0.329347	0.808032	1.11805	0.790457	2.61035
109134349	NP_036265.3	COPG2	coatomer subunit gamma-2	3	1.01698	1.86261	0.807977	50.383	0.822899	8.04766
24308039	NP_056138.1	UFL1	E3 UFM1-protein ligase 1	10	0.872641	14.1285	0.807608	130.444	1.00341	115.882
4506007	NP_002701.1	PPP1CC	serine/threonine-protein phosphatase PP1-gamma catalytic subunit isoform 1	1	1.23842	n/a	0.805442	n/a	0.961726	n/a
31542509	NP_112574.3	ADPGK	ADP-dependent glucokinase precursor	1	1.43445	n/a	0.805367	n/a		n/a
76880486	NP_006819.2	ASCC3	activating signal cointegrator 1 complex subunit 3 isoform a	2	0.757986	n/a	0.804588	n/a	0.748422	n/a
300934787	NP_001180263.1	WLS	protein wntless homolog isoform 3	1	0.810078	n/a	0.803597	n/a	0.851747	n/a
206725424	NP_940848.2	C1orf122	uncharacterized protein C1orf122 isoform 1	1	0.636595	n/a	0.803379	n/a	0.977089	n/a
156616275	NP_002682.2	POLD1	DNA polymerase delta catalytic subunit	2	1.24835	n/a	0.80141	n/a	1.39476	n/a
21359865	NP_004248.2	TGFBRAP1	transforming growth factor-beta receptor-associated protein 1	2	0.823388	5.72531	0.80099	23.0141	0.926462	38.1714
24638454	NP_733765.1	ATP2A2	sarcoplasmic/endoplasmic reticulum calcium ATPase 2 isoform b	17	0.922492	7.14224	0.800551	58.4256	0.865661	70.0612
22202611	NP_001295.2	CPD	carboxypeptidase D isoform 1 precursor	4	1.30858	42.6114	0.800319	n/a	1.1928	46.091
25777602	NP_002799.3	PSMD2	26S proteasome non-ATPase regulatory subunit 2	5	0.83398	14.4275	0.799855	104.122	0.680194	118.918
62988355	NP_001017928.1	CCDC58	coiled-coil domain-containing protein 58	4	0.913235	9.68057	0.799403	46.7736	0.634547	68.7227
41327773	NP_055644.2	DDX46	probable ATP-dependent RNA helicase DDX46	4	0.914526	9.89554	0.798478	22.6294	0.928293	45.381
4758762	NP_004530.1	NARS	asparagine--tRNA ligase, cytoplasmic	2	0.925976	11.2222	0.797788	72.4629	0.758394	80.364
11034845	NP_067038.1	RPRD1B	regulation of nuclear pre-mRNA domain-containing protein 1B	4	1.03113	0.463932	0.796528	11.8835	0.823967	27.7526
205277435	NP_001128524.1	SYK	tyrosine-protein kinase SYK isoform 2	2	0.893396	n/a	0.795374	n/a	0.877715	n/a
194733742	NP_005654.3	NELFA	negative elongation factor A	1	0.599879	n/a	0.794297	n/a	0.878033	n/a
4758040	NP_004365.1	COX6C	cytochrome c oxidase subunit 6C proprotein	2	0.925645	0.451179	0.792761	6.63596	0.809669	11.2677
100913206	NP_001348.2	DHX9	ATP-dependent RNA helicase A	9	0.939864	14.064	0.792711	108.128	0.778689	415.423
4502315	NP_001686.1	ATP6V1C1	V-type proton ATPase subunit C 1	3	0.890083	22.4665	0.792296	3.57243	0.70524	18.425
323362983	NP_001191006.1	UBE4A	ubiquitin conjugation factor E4 A isoform 2	1	0.736797	n/a	0.790814	n/a	0.70575	n/a
10190720	NP_065728.1	NMRAL1	nmrA-like family domain-containing protein 1	2	0.949032	6.79708	0.789374	33.4606	0.637476	32.0866
58530848	NP_001011546.1	DSTN	destrin isoform b	2	1.61262	84.164	0.789302	50.4388	1.12581	148.644
410172829	XP_003960579.1	LOC101060458	peptidyl-prolyl cis-trans isomerase A-like	2	0.954427	1.62476	0.788327	19.4975	0.621314	26.9864
109452587	NP_775882.2	FAM98B	protein FAM98B isoform 1	1	0.889859	n/a	0.788059	n/a	0.561443	n/a
66348091	NP_060550.2	VPS13C	vacuolar protein sorting-associated protein 13C isoform 1B	7	0.907605	10.9334	0.786531	2.0666	0.848789	13.4025
20127454	NP_004035.2	ATIC	bifunctional purine biosynthesis protein PURH	3	0.977013	6.98333	0.786515	23.0997	0.737414	29.1996
122937211	NP_001073867.1	KIAA0368	proteasome-associated protein ECM29 homolog	6	0.85916	7.78617	0.784096	90.3976	0.368935	297.199
410169914	XP_001716250.4	LOC642131	uncharacterized protein LOC642131	1	0.990599	27.511	0.783538	1.08772	0.707368	26.103
28372533	NP_777569.1	TMEM167A	protein kish-A precursor	1	0.972404	n/a	0.782332	n/a	0.782508	n/a
222136639	NP_005947.3	MTHFD1	C-1-tetrahydrofolate synthase, cytoplasmic	14	0.97055	10.985	0.782152	24.602	0.843086	54.0891
342672053	NP_001230154.1	PES1	pescadillo homolog isoform 2	2	0.73464	n/a	0.781982	n/a	0.645327	n/a
4826932	NP_005029.1	PPID	peptidyl-prolyl cis-trans isomerase D	3	1.06255	2.30323	0.781456	139.873	0.971553	82.6968
7242140	NP_006651.2	CLPX	ATP-dependent Clp protease ATP-binding subunit clpX-like, mitochondrial precursor	5	0.872166	14.4181	0.780936	88.3842	0.653951	28.3267
339275831	NP_001229852.1	EIF3L	eukaryotic translation initiation factor 3 subunit L isoform 2	8	0.933201	19.4438	0.780415	113.559	0.692576	144.629
4758648	NP_004512.1	KIF5B	kinesin-1 heavy chain	18	0.962132	15.7399	0.7802	47.1004	0.69236	43.2389
85815829	NP_061830.3	SH3BP1	SH3 domain-binding protein 1	5	0.947652	40.0084	0.778334	13.0782	0.675491	68.4309
38044112	NP_937883.1	CLIP1	CAP-Gly domain-containing linker protein 1 isoform b	4	1.0983	12.1207	0.778055	71.8426	0.848311	101.307
4507835	NP_000364.1	UMPS	uridine 5'-monophosphate synthase	1	0.844662	n/a	0.776664	n/a	0.87268	n/a
48527957	NP_001001556.1	GALK2	N-acetylgalactosamine kinase isoform 2	4	0.648637	27.4358	0.776046	n/a	1.2646	n/a
41322910	NP_958783.1	PLEC	plectin isoform 1d	101	0.970036	10.6377	0.776034	56.5935	0.741488	63.4499
14042927	NP_114405.1	STARD3NL	MLN64 N-terminal domain homolog	1	0.631311	n/a	0.775278	n/a	1.0071	n/a
451327636	NP_001263409.1	LONP1	lon protease homolog, mitochondrial isoform 3	5	0.958786	20.2791	0.774677	54.4701	0.877724	76.0354
45827776	NP_996734.1	RTN1	reticulon-1 isoform C	1	0.939495	n/a	0.774173	n/a	0.738118	n/a
62530391	NP_005401.3	SEPP1	selenoprotein P isoform 1 precursor	2	1.27739	24.4537	0.773933	n/a	0.832126	n/a
401461777	NP_001257825.1	TRAPPC3	trafficking protein particle complex subunit 3 isoform 3	2	1.18753	13.3923	0.773778	n/a	0.514265	105.047
15055539	NP_002943.2	RPS2	40S ribosomal protein S2	5	0.920796	2.41098	0.772503	30.4242	0.722177	12.3033
73915094	NP_001027536.1	GGT1	gamma-glutamyltranspeptidase 1 precursor	4	1.13247	12.6244	0.771817	161.618	0.901336	136.528
169404009	NP_003135.2	SSR1	translocon-associated protein subunit alpha precursor	2	1.04824	3.39219	0.771181	2.58568	0.701956	3.37245
226056130	NP_001139581.1	PTGR1	prostaglandin reductase 1 isoform 2	3	1.06861	14.7192	0.771095	n/a	0.812026	n/a
109948292	NP_065905.2	KIAA1468	lisH domain and HEAT repeat-containing protein KIAA1468	2	1.02872	n/a	0.769861	n/a	0.654071	n/a
7661920	NP_055555.1	EIF4A3	eukaryotic initiation factor 4A-III	3	0.988853	6.14289	0.769759	37.709	0.769893	43.6659
150417971	NP_003165.2	SVIL	supervillin isoform 1	2	0.812594	29.3605	0.769029	3.07462	0.63989	10.7076
194272142	NP_001123537.1	MYO9B	unconventional myosin-IXb isoform 2	2	0.83926	n/a	0.768801	n/a	0.406468	n/a
4505917	NP_002676.1	EXOSC10	exosome component 10 isoform 2	4	1.06723	7.15252	0.768499	244.891	0.795784	200.985
221316614	NP_004416.2	ECM1	extracellular matrix protein 1 isoform 1 precursor	1	1.2333	n/a	0.767869	n/a	0.841093	n/a
37595548	NP_055750.2	PLEKHA6	pleckstrin homology domain-containing family A member 6	2	1.37786	14.1262	0.76641	n/a	0.606159	n/a
21536320	NP_653333.1	HNRNPUL1	heterogeneous nuclear ribonucleoprotein U-like protein 1 isoform d	4	0.804627	34.9011	0.765702	184.931	0.770422	71.1902
283046676	NP_001164040.1	CXorf56	UPF0428 protein CXorf56 isoform 2	2	0.808177	n/a	0.762414	n/a	2.44204	n/a
194294508	NP_001123571.1	KIFC3	kinesin-like protein KIFC3 isoform 3	1	0.951805	n/a	0.761815	n/a	0.507686	n/a
313747584	NP_001186308.1	GBF1	Golgi-specific brefeldin A-resistance guanine nucleotide exchange factor 1 isoform 3	4	0.736696	7.06272	0.760349	47.2215	0.624868	33.5702
21735621	NP_005909.2	MDH2	malate dehydrogenase, mitochondrial precursor	12	0.947944	25.9601	0.759016	97.1493	0.646263	126.486
197313748	NP_054878.5	SETD2	histone-lysine N-methyltransferase SETD2	1	0.596859	n/a	0.758925	n/a	0.564772	n/a
51242945	NP_003153.2	STRN	striatin	2	0.942634	3.66952	0.758011	2.73516	0.802904	15.248
156151366	NP_054900.2	LGALSL	galectin-related protein	1	1.02651	n/a	0.757254	n/a	1.16119	n/a
337298620	NP_001229658.1	ARHGEF38	rho guanine nucleotide exchange factor 38 isoform 1	1	0.807035	n/a	0.755414	n/a	0.87804	n/a
4503503	NP_001405.1	EIF2B1	translation initiation factor eIF-2B subunit alpha	2	0.943628	n/a	0.755002	n/a	0.764112	n/a
115430252	NP_037365.2	STK39	STE20/SPS1-related proline-alanine-rich protein kinase	2	0.916514	6.43533	0.754911	96.3347	0.803081	81.9313
71143119	NP_055888.1	SIPA1L3	signal-induced proliferation-associated 1-like protein 3	1	0.93659	n/a	0.754272	n/a	0.866171	n/a
5032315	NP_004001.1	DMD	dystrophin Dp427p2 isoform	3	1.07314	9.83934	0.752817	51.4447	0.596896	68.683
16933567	NP_005361.2	RAB8A	ras-related protein Rab-8A	4	1.02426	9.04847	0.752769	51.2675	0.840586	44.3476
344030204	NP_001230648.1	RAB6A	ras-related protein Rab-6A isoform c	3	0.927965	1.51389	0.751954	19.834	0.679176	1.64343
190194420	NP_112189.2	TSPAN14	tetraspanin-14 isoform 1	1	0.849581	n/a	0.751884	n/a	1.00443	n/a
4885079	NP_005165.1	ATP5C1	ATP synthase subunit gamma, mitochondrial isoform H (heart) precursor	4	0.945122	7.51648	0.751491	121.54	0.751337	136.306
5453740	NP_006462.1	MYL12A	myosin regulatory light chain 12A	3	0.720371	n/a	0.751173	n/a		n/a
5031695	NP_005657.1	CFHR2	complement factor H-related protein 2 precursor	1	0.786061	n/a	0.750706	n/a	0.809833	n/a
225903430	NP_001139630.1	MOGS	mannosyl-oligosaccharide glucosidase isoform 2	3	1.01127	12.776	0.750124	3.54576	0.565582	5.58682
299523086	NP_006001.3	MANF	mesencephalic astrocyte-derived neurotrophic factor precursor	7	0.940154	8.1919	0.749951	37.1986	0.887328	70.8751
166235903	NP_001107573.1	C1QC	complement C1q subcomponent subunit C precursor	2	0.8967	3.2098	0.749772	31.4333	0.724029	7.36402
40805860	NP_003279.2	TPD52L2	tumor protein D54 isoform e	7	0.978872	7.34266	0.7496	245.166	0.68098	359.786
24497453	NP_002523.2	NUP88	nuclear pore complex protein Nup88	3	0.817483	26.9527	0.748843	45.8101	0.64327	117.922
21361794	NP_060918.2	CAND1	cullin-associated NEDD8-dissociated protein 1	11	1.02941	18.5828	0.748322	141.832	0.793887	109.519
38093659	NP_938023.1	TMEM173	stimulator of interferon genes protein	1	0.944398	37.0286	0.747235	n/a	0.899263	n/a
153070260	NP_002347.5	MARCKS	myristoylated alanine-rich C-kinase substrate	2	0.838408	5.05791	0.74712	33.1462	0.640855	22.864
7661952	NP_055521.1	SART3	squamous cell carcinoma antigen recognized by T-cells 3	3	0.85375	25.7416	0.745682	80.3123	0.547386	187.896
22202629	NP_665811.1	AIFM1	apoptosis-inducing factor 1, mitochondrial isoform 2 precursor	7	0.855451	22.1123	0.745416	50.0993	0.720411	74.3957
16579885	NP_000959.2	RPL4	60S ribosomal protein L4	10	0.907339	9.34015	0.745188	367.903	0.678721	392.949
4506195	NP_002785.1	PSMB2	proteasome subunit beta type-2 isoform 1	4	0.923952	1.4707	0.745074	29.8735	0.76143	26.7365
333470717	NP_001193996.1	BZW1	basic leucine zipper and W2 domain-containing protein 1 isoform 1	6	0.962726	9.62494	0.745008	40.3403	1.06797	44.0061
115430112	NP_005660.4	REEP5	receptor expression-enhancing protein 5	5	0.930039	10.96	0.744603	22.9485	0.733839	97.584
338968923	NP_001229819.1	DDC	aromatic-L-amino-acid decarboxylase isoform 6	3	0.97635	10.1931	0.743329	46.8273	0.697774	20.341
7657015	NP_055121.1	RTCB	tRNA-splicing ligase RtcB homolog	4	0.992858	56.1512	0.743065	0.0773155	0.998873	13.075
14277700	NP_001007.2	RPS12	40S ribosomal protein S12	6	1.06748	39.5065	0.742009	213.723	1.02044	208.791
54607033	NP_001005731.1	ITGB4	integrin beta-4 isoform 3 precursor	3	1.23318	n/a	0.741147	n/a	0.688381	n/a
31742498	NP_056189.1	SUN2	SUN domain-containing protein 2 isoform b	1	1.32785	n/a	0.741021	n/a	1.25427	n/a
72534684	NP_001026866.1	PLD3	phospholipase D3	2	1.06124	21.2807	0.74078	7.92614	0.732224	3.5815
388240801	NP_116126.3	LMNB2	lamin-B2	12	0.954404	10.9742	0.740536	18.3912	0.741553	33.8036
21265070	NP_057034.2	MRPL2	39S ribosomal protein L2, mitochondrial	2	0.845899	7.20878	0.740477	n/a	0.753112	n/a
4503895	NP_000145.1	GALK1	galactokinase	1	1.10308	n/a	0.73964	n/a	1.17083	n/a
157738667	NP_078789.2	FYCO1	FYVE and coiled-coil domain-containing protein 1	5	0.958955	12.3384	0.739447	72.8874	0.693106	36.6715
197313672	NP_001127894.1	CDV3	protein CDV3 homolog isoform a	1	0.871157	0.941697	0.739375	11.3482	0.715616	6.33659
410173146	XP_003960677.1	LOC101060570	eukaryotic elongation factor 2 kinase-like	1	0.830376	n/a	0.739291	n/a	0.751252	n/a
38202257	NP_938148.1	GANAB	neutral alpha-glucosidase AB isoform 2 precursor	11	0.93034	12.8391	0.73925	74.6642	0.805215	173.42
37620210	NP_932342.1	COX20	cytochrome c oxidase protein 20 homolog	1	0.927115	n/a	0.736999	n/a	1.08387	n/a
124028525	NP_005678.3	FARSB	phenylalanine--tRNA ligase beta subunit	7	0.911543	9.15091	0.736342	91.928	0.666659	140.91
38201714	NP_001410.2	ELAVL1	ELAV-like protein 1	3	1.01049	2.64242	0.73612	499.465	0.815757	453.687
157388939	NP_060453.3	WIPI1	WD repeat domain phosphoinositide-interacting protein 1	1	0.935794	n/a	0.73572	n/a	0.743194	n/a
281485550	NP_000129.3	FBN1	fibrillin-1 precursor	2	1.40417	37.2798	0.735573	31.2802	0.579153	n/a
296010868	NP_001171551.1	STAT6	signal transducer and activator of transcription 6 isoform 2	3	0.817118	n/a	0.735215	n/a	0.750195	n/a
7662310	NP_055623.1	FARP2	FERM, RhoGEF and pleckstrin domain-containing protein 2	1	0.787334	n/a	0.734213	n/a	0.576745	n/a
5031851	NP_005554.1	STMN1	stathmin isoform a	9	0.942299	21.4996	0.733466	131.349	0.784932	107.409
54607053	NP_006827.1	GCN1L1	translational activator GCN1	14	0.936487	16.0234	0.73285	26.6608	0.680981	47.4557
54607135	NP_055635.3	TOMM70A	mitochondrial import receptor subunit TOM70	8	0.95415	23.3372	0.73223	407.762	0.742308	988.105
4507217	NP_003124.1	SRP9	signal recognition particle 9 kDa protein isoform 2	2	1.01437	n/a	0.729205	n/a	0.834053	n/a
284925165	NP_001165415.1	SUN1	SUN domain-containing protein 1 isoform c	1	0.967968	n/a	0.728074	n/a	0.575829	n/a
5453634	NP_006132.1	DYNC1LI2	cytoplasmic dynein 1 light intermediate chain 2	3	1.01177	8.54627	0.72762	21.7397	0.750473	22.0999
12232385	NP_073567.1	COPS7B	COP9 signalosome complex subunit 7b	1	1.06988	n/a	0.725869	n/a	1.00596	n/a
5031877	NP_005564.1	LMNB1	lamin-B1 isoform 1	18	1.00065	13.1281	0.725443	44.1844	0.755289	37.0854
13128864	NP_006035.2	HDAC6	histone deacetylase 6	2	0.883309	n/a	0.724516	n/a	0.861447	n/a
21361144	NP_002795.2	PSMC3	26S protease regulatory subunit 6A	2	0.927463	11.3509	0.724389	604.107	1.27224	134.264
296010850	NP_001171547.1	ASNS	asparagine synthetase [glutamine-hydrolyzing] isoform c	1	1.14162	n/a	0.724344	n/a	0.762833	n/a
371121601	NP_001243048.1	NAA10	N-alpha-acetyltransferase 10 isoform 2	1	2.35194	n/a	0.724027	n/a		n/a
115298674	NP_002499.2	NID1	nidogen-1 precursor	1	0.721771	n/a	0.723942	n/a	0.773883	n/a
164519076	NP_055557.2	TM9SF4	transmembrane 9 superfamily member 4 precursor	1	0.945672	n/a	0.723509	n/a	0.715688	n/a
7706497	NP_057392.1	CMPK1	UMP-CMP kinase isoform a	5	1.00317	14.704	0.723007	31.5449	0.724183	9.54285
21264602	NP_005551.3	LAMA5	laminin subunit alpha-5 precursor	3	1.00693	n/a	0.722466	n/a	0.684359	n/a
4505163	NP_002399.1	MGAT2	alpha-1,6-mannosyl-glycoprotein 2-beta-N-acetylglucosaminyltransferase	2	0.878949	n/a	0.720982	n/a	0.772334	n/a
116812567	NP_065120.2	RAB25	ras-related protein Rab-25	2	0.960856	10.9862	0.720351	20.6011	0.761235	23.2496
4506707	NP_001019.1	RPS25	40S ribosomal protein S25	4	1.02644	3.39751	0.718633	17.9867	0.669565	17.0522
91199540	NP_000099.2	DLD	dihydrolipoyl dehydrogenase, mitochondrial precursor	10	1.01289	11.0293	0.717896	142.878	0.781488	110.345
5031635	NP_005498.1	CFL1	cofilin-1	5	0.941115	6.27739	0.71783	99.9609	0.698927	80.7212
8923857	NP_060917.1	EMC3	ER membrane protein complex subunit 3	2	0.514332	282.633	0.717585	488.356	0.765976	34.1197
4759212	NP_004598.1	TBCA	tubulin-specific chaperone A	3	1.0394	16.4253	0.717378	64.5036	0.697644	37.0299
115387094	NP_002991.2	SDHB	succinate dehydrogenase [ubiquinone] iron-sulfur subunit, mitochondrial precursor	4	1.03035	39.5537	0.717218	490.227	0.92958	926.013
28416949	NP_060854.2	GIMAP5	GTPase IMAP family member 5	1	0.62245	n/a	0.71518	n/a	0.454996	n/a
21264315	NP_644670.1	EHD4	EH domain-containing protein 4	7	1.01931	39.062	0.713595	58.2818	0.483873	90.0038
29826323	NP_054909.2	ADD1	alpha-adducin isoform c	8	0.91013	8.11263	0.712277	40.5759	0.89761	46.422
42476296	NP_003280.2	TPM2	tropomyosin beta chain isoform 1	4	0.930853	12.2598	0.712266	13.5384	0.662611	18.9666
40254446	NP_003469.2	CUL5	cullin-5	8	0.935938	5.95919	0.710976	41.24	0.452133	42.3207
149999378	NP_001026884.3	INF2	inverted formin-2 isoform 2	3	0.923938	0.865964	0.710076	1585.61	0.596386	1722.29
410171322	XP_003960231.1	LOC101060567	peroxisomal membrane protein 11B-like isoform 2	2	0.812479	34.553	0.708783	17.2148	0.802182	3.87801
55956921	NP_004490.2	HNRNPAB	heterogeneous nuclear ribonucleoprotein A/B isoform b	2	1.09558	15.8468	0.708463	19.5473	0.692336	31.6055
74027251	NP_148980.2	TRIM33	E3 ubiquitin-protein ligase TRIM33 isoform beta	2	1.33821	n/a	0.707792	n/a	0.675698	n/a
18104989	NP_002822.2	PTPN6	tyrosine-protein phosphatase non-receptor type 6 isoform 1	5	0.955232	6.31932	0.707525	50.1092	0.469679	166.041
339639597	NP_001229885.1	2014-09-07	septin-7 isoform 3	5	0.955213	7.85114	0.707277	82.1321	0.727125	77.3281
190014578	NP_054735.3	SACM1L	phosphatidylinositide phosphatase SAC1	2		n/a	0.707193	n/a	0.647765	n/a
4507677	NP_003290.1	HSP90B1	endoplasmin precursor	28	0.952765	10.9155	0.706652	684.692	0.696907	889.433
62751417	NP_776186.2	RABL3	rab-like protein 3	2	1.56509	85.0678	0.705787	n/a	0.616419	n/a
4758304	NP_004902.1	PDIA4	protein disulfide-isomerase A4 precursor	12	0.958666	7.1233	0.704976	145.489	0.749316	125.803
94721241	NP_002152.2	IARS	isoleucine--tRNA ligase, cytoplasmic	8	1.10028	28.285	0.704937	31.2882	0.671267	68.2688
12408656	NP_005177.2	CAPN1	calpain-1 catalytic subunit	4	0.986009	5.60001	0.703803	18.48	0.747692	28.7602
18201905	NP_000166.2	GPI	glucose-6-phosphate isomerase isoform 2	12	0.977308	6.66821	0.703102	513.147	0.725159	629.712
5031755	NP_005817.1	HNRNPR	heterogeneous nuclear ribonucleoprotein R isoform 2	5	1.05448	20.8625	0.70207	30.8131	0.669003	76.6639
351721595	NP_001234936.1	TRIM3	tripartite motif-containing protein 3 isoform 2	2	0.601139	n/a	0.699335	n/a	0.631551	n/a
30795231	NP_006308.3	BASP1	brain acid soluble protein 1	1	0.888724	n/a	0.699073	n/a	0.685193	n/a
4503165	NP_003581.1	CUL3	cullin-3 isoform 1	1	1.02836	n/a	0.6975	n/a	0.64135	n/a
7706143	NP_057692.1	ARMCX1	armadillo repeat-containing X-linked protein 1	1	1.25054	n/a	0.695658	n/a	0.562056	n/a
38569473	NP_004536.2	NDUFB1	NADH dehydrogenase [ubiquinone] 1 beta subcomplex subunit 1	1	0.856396	n/a	0.695116	n/a	0.627132	n/a
157388993	NP_060843.2	SYNJ2BP	synaptojanin-2-binding protein	7	0.857786	10.8281	0.694822	38.0994	0.75966	80.9482
359465572	NP_001240752.1	BLVRA	biliverdin reductase A precursor	3	0.945911	2.78677	0.69422	32.8639	0.662757	34.4674
19923790	NP_036546.2	RAB3GAP2	rab3 GTPase-activating protein non-catalytic subunit	1	0.873286	n/a	0.692562	n/a	0.723785	n/a
156071459	NP_001143.2	SLC25A5	ADP/ATP translocase 2	3	0.976893	11.5785	0.691692	53.8734	0.644044	58.5433
7657369	NP_055037.1	NDUFA8	NADH dehydrogenase [ubiquinone] 1 alpha subcomplex subunit 8	1	0.974018	n/a	0.690674	n/a	0.588215	n/a
148536853	NP_004362.2	COPA	coatomer subunit alpha isoform 2	19	0.990951	23.0974	0.689948	98.3301	1.02888	93.074
5803225	NP_006752.1	YWHAE	14-3-3 protein epsilon	7	0.962424	7.71234	0.689674	84.0481	0.888062	47.642
19743879	NP_602309.1	RFX2	DNA-binding protein RFX2 isoform b	1	0.69859	n/a	0.689471	n/a	0.742423	n/a
4885661	NP_005424.1	YES1	tyrosine-protein kinase Yes	1	0.992814	n/a	0.689187	n/a	0.581118	n/a
268607506	NP_002472.2	PPP1R12B	protein phosphatase 1 regulatory subunit 12B isoform a	2	0.757278	n/a	0.68853	n/a	0.555733	n/a
117938765	NP_001070957.1	GNAS	protein GNAS isoform g	4	0.8309	9.47693	0.688206	n/a	0.472604	40.1405
205277412	NP_001128516.1	MAPK9	mitogen-activated protein kinase 9 isoform JNK2 gamma	1	0.996465	n/a	0.687901	n/a	0.787831	n/a
38327558	NP_004111.2	GBP2	interferon-induced guanylate-binding protein 2	4	0.91419	7.66928	0.687823	45.7269	0.625823	67.4202
108773782	NP_002931.2	ABCE1	ATP-binding cassette sub-family E member 1	5	0.975918	31.1552	0.687805	67.2355	0.704951	24.0436
116284394	NP_079005.3	MYH14	myosin-14 isoform 2	41	0.96797	18.7901	0.687176	109.037	0.683495	146.924
315434216	NP_001186780.1	DAP3	28S ribosomal protein S29, mitochondrial isoform 3	5	0.876608	5.0804	0.6867	163.453	0.731412	123.619
321400140	NP_001189485.1	CD44	CD44 antigen isoform 7 precursor	4	0.961755	9.85597	0.68651	26.204	0.656969	29.0216
384551656	NP_001245138.1	HMBS	porphobilinogen deaminase isoform 4	2	0.862273	16.981	0.68633	184.895	0.763129	149.665
42741675	NP_976227.1	PDLIM7	PDZ and LIM domain protein 7 isoform 2	2	0.99635	18.6452	0.685715	44.3976	0.594081	17.4986
215276969	NP_001135836.1	ALG5	dolichyl-phosphate beta-glucosyltransferase isoform 2	1	0.86071	n/a	0.684242	n/a	0.685698	n/a
4505891	NP_001075.1	PLOD3	procollagen-lysine,2-oxoglutarate 5-dioxygenase 3 precursor	1	0.93583	n/a	0.683656	n/a	0.619048	n/a
371874679	NP_001243117.1	SNX12	sorting nexin-12 isoform 4	1	0.806184	n/a	0.683593	n/a	0.608105	n/a
62241024	NP_001014451.1	DDX19B	ATP-dependent RNA helicase DDX19B isoform 2	2	0.745358	6.216	0.683542	n/a	0.599218	n/a
4506787	NP_003861.1	IQGAP1	ras GTPase-activating-like protein IQGAP1	34	0.945462	7.27453	0.683103	101.117	0.726327	84.8277
47419914	NP_004175.2	WARS	tryptophan--tRNA ligase, cytoplasmic isoform a	2	0.866043	n/a	0.681532	n/a	0.671301	n/a
119874209	NP_001073310.1	OCIAD1	OCIA domain-containing protein 1 isoform 3	2	1.01954	8.17034	0.680183	6.42702	0.763225	0.767979
4557403	NP_000378.1	SLC25A20	mitochondrial carnitine/acylcarnitine carrier protein	2	1.02191	8.08089	0.680062	12.3071	0.824332	46.7609
343432569	NP_001230303.1	CLCN3	H(+)/Cl(-) exchange transporter 3 isoform c	1	0.96806	n/a	0.679826	n/a	0.721727	n/a
313151210	NP_001186221.1	HSD17B4	peroxisomal multifunctional enzyme type 2 isoform 3	8	0.964772	7.96953	0.679067	126.378	0.725171	163.351
33350932	NP_001367.2	DYNC1H1	cytoplasmic dynein 1 heavy chain 1	35	0.952805	14.0996	0.677818	79.4746	0.616569	87.52
5453946	NP_006232.1	PPP1R2	protein phosphatase inhibitor 2	1	0.982302	n/a	0.677808	n/a	0.747921	n/a
157412270	NP_112480.2	HNRNPM	heterogeneous nuclear ribonucleoprotein M isoform b	11	0.986931	12.0925	0.677321	352.829	0.726451	151.581
28178825	NP_005887.2	IDH1	isocitrate dehydrogenase [NADP] cytoplasmic	5	0.950834	7.37964	0.677175	57.6099	0.58411	87.953
4759188	NP_004844.1	STX8	syntaxin-8	2	0.832771	n/a	0.676959	n/a	0.666009	n/a
145312241	NP_071330.3	DEF6	differentially expressed in FDCP 6 homolog	4	1.45658	62.2564	0.67657	179.267	0.59669	n/a
74027265	NP_001027539.1	SPINT1	kunitz-type protease inhibitor 1 isoform 2 precursor	2	0.945791	3.42897	0.67611	2.83798	0.706398	6.59524
21536286	NP_001814.2	CKB	creatine kinase B-type	10	0.983142	10.3613	0.674881	301.587	0.66567	55.6875
4505931	NP_002681.1	POLB	DNA polymerase beta	1	0.63159	n/a	0.674076	n/a		n/a
34485709	NP_899058.1	RAB27A	ras-related protein Rab-27A	3	0.696441	57.9959	0.672534	574.548	0.747599	542.423
27886588	NP_775267.1	PTK2B	protein-tyrosine kinase 2-beta isoform b	2	2.06187	35.6896	0.672459	74.7047	0.683613	69.9106
4757834	NP_004273.1	BAG2	BAG family molecular chaperone regulator 2	2	0.75887	10.5797	0.672395	21.1614	0.707303	35.0626
238776833	NP_005773.3	ALYREF	THO complex subunit 4	4	1.02062	22.1355	0.671834	359.551	0.942082	99.9079
14249376	NP_116136.1	USMG5	up-regulated during skeletal muscle growth protein 5	2	0.971368	4.97977	0.671603	15.3958	0.546423	18.3712
114326455	NP_065971.2	CHD8	chromodomain-helicase-DNA-binding protein 8 isoform 2	1	0.785146	n/a	0.670012	n/a		n/a
88501740	NP_008963.3	TRIOBP	TRIO and F-actin-binding protein isoform 1	2	0.987811	12.5298	0.669878	28.1993	0.685731	59.9897
110227615	NP_694997.2	EML3	echinoderm microtubule-associated protein-like 3	3	0.762938	n/a	0.66713	n/a	0.48344	n/a
38569417	NP_065796.1	AARS2	alanine--tRNA ligase, mitochondrial	3	0.76991	26.8324	0.665876	79.9477	0.386175	61.5014
4557417	NP_000582.1	CD14	monocyte differentiation antigen CD14 precursor	2	0.875713	n/a	0.665478	n/a	0.634648	n/a
34878777	NP_062538.5	RNF20	E3 ubiquitin-protein ligase BRE1A	2	1.8076	n/a	0.665365	n/a	0.723172	n/a
111038133	NP_056329.1	NGDN	neuroguidin isoform 2	1	1.05862	n/a	0.664406	n/a	0.805318	n/a
21614499	NP_003370.2	EZR	ezrin	12	0.951286	5.44908	0.6633	49.7638	0.663146	67.0507
339882741	NP_001229971.1	HLA-C	HLA class I histocompatibility antigen, Cw-1 alpha chain precursor	1	1.64517	115.432	0.66328	1169.66	1.14801	4857.5
154354987	NP_001093646.1	HOOK2	protein Hook homolog 2 isoform 2	1	0.925484	n/a	0.662517	n/a	0.542758	n/a
17978485	NP_065908.1	VPS18	vacuolar protein sorting-associated protein 18 homolog	1		n/a	0.661286	n/a		n/a
193794853	NP_079197.3	POF1B	protein POF1B	6	0.960064	19.3688	0.661006	40.3632	0.705247	52.3127
105990532	NP_000375.2	APOB	apolipoprotein B-100 precursor	22	1.01782	21.4792	0.660968	63.0669	0.749182	63.0411
7661806	NP_054894.1	MRPL15	39S ribosomal protein L15, mitochondrial	1	1.07533	n/a	0.660348	n/a	0.702303	n/a
10863903	NP_004229.1	TRIP12	E3 ubiquitin-protein ligase TRIP12	2	0.834733	n/a	0.65806	n/a	0.764897	n/a
4506975	NP_001037.1	SLC12A2	solute carrier family 12 member 2 isoform 1	16	0.954149	3.59585	0.657563	132.479	0.63572	129.409
22748641	NP_689485.1	CHMP7	charged multivesicular body protein 7	2	0.995407	n/a	0.657216	n/a	0.562536	27.0672
296531339	NP_001171812.1	PLCB3	1-phosphatidylinositol 4,5-bisphosphate phosphodiesterase beta-3 isoform 2	7	1.05472	5.46985	0.65687	76.2959	0.402884	38.8472
30260192	NP_835498.1	ATPIF1	ATPase inhibitor, mitochondrial isoform 3 precursor	1	0.945304	1.56633	0.654687	3.32871	0.640959	25.3202
48255947	NP_001001323.1	ATP2B1	plasma membrane calcium-transporting ATPase 1 isoform 1a	3	0.904976	5.71052	0.65456	64.3693	0.643686	63.7174
31982936	NP_003892.2	SGPL1	sphingosine-1-phosphate lyase 1	2	0.998599	0.579294	0.654408	136.826	0.70801	115.665
38016947	NP_001726.2	C5	complement C5 preproprotein	5	0.991568	6.51455	0.654319	92.0523	0.653666	61.8683
5174447	NP_006089.1	GNB2L1	guanine nucleotide-binding protein subunit beta-2-like 1	7	1.01041	9.85892	0.654269	204.463	0.751518	209.1
148728160	NP_001091973.1	PTPRJ	receptor-type tyrosine-protein phosphatase eta isoform 2 precursor	2	0.446007	n/a	0.653582	n/a		n/a
354721179	NP_001238966.1	RAB5B	ras-related protein Rab-5B isoform 2	1	1.01732	7.11659	0.65344	17.8789	0.598048	13.7971
5454052	NP_006133.1	SFN	14-3-3 protein sigma	1	0.804691	n/a	0.653136	n/a	0.598169	n/a
24430151	NP_002793.2	PSMC1	26S protease regulatory subunit 4	4	0.874747	13.1695	0.652772	24.4414	0.618687	39.0712
83267879	NP_003898.2	EIF2B5	translation initiation factor eIF-2B subunit epsilon	1	0.986777	n/a	0.652312	n/a	0.994731	n/a
31542325	NP_066974.2	CROT	peroxisomal carnitine O-octanoyltransferase isoform 2	1	0.883801	n/a	0.650952	n/a	0.63984	n/a
46852172	NP_056069.2	KIF13B	kinesin-like protein KIF13B	6	0.934143	9.66179	0.6508	68.1319	0.697291	61.9718
4502993	NP_001858.1	COX7C	cytochrome c oxidase subunit 7C, mitochondrial precursor	1	0.949304	1.194	0.650645	0.316478	0.651441	0.872281
40068497	NP_076996.2	FASTKD3	FAST kinase domain-containing protein 3	1	0.864503	n/a	0.650049	n/a	0.698464	n/a
126012562	NP_002323.2	LRP1	prolow-density lipoprotein receptor-related protein 1 precursor	6	0.962121	3.35309	0.649343	11.8884	0.664016	12.6971
24308013	NP_055975.1	PMPCA	mitochondrial-processing peptidase subunit alpha precursor	1	1.02111	n/a	0.647496	n/a	0.572802	n/a
4503525	NP_003743.1	EIF3C	eukaryotic translation initiation factor 3 subunit C	7	0.845949	20.4439	0.647476	252.351	0.503976	221.973
155030211	NP_002115.2	HLA-DRB1	major histocompatibility complex, class II, DR beta 1 precursor	2	1.03233	n/a	0.645954	n/a	0.656495	n/a
18543329	NP_002804.2	PSMD9	26S proteasome non-ATPase regulatory subunit 9 isoform 1	1	0.951552	n/a	0.64538	n/a	0.603285	n/a
5803167	NP_006793.1	SF3A3	splicing factor 3A subunit 3	3	0.948128	20.1227	0.645095	63.6423	0.41925	58.8115
31542747	NP_653190.2	COMTD1	catechol O-methyltransferase domain-containing protein 1	1	0.829086	n/a	0.643746	n/a	0.549476	n/a
57242774	NP_055495.2	KIAA0100	UPF0378 protein KIAA0100 precursor	1	0.838787	n/a	0.641304	n/a	0.981422	n/a
4502107	NP_001145.1	ANXA5	annexin A5	4	0.941239	6.19493	0.641106	772.541	0.666715	886.222
299758464	NP_001139685.2	TBC1D15	TBC1 domain family member 15 isoform 3	3	0.883543	41.6442	0.640646	100.997	0.526216	82.0837
27477070	NP_003963.1	BTAF1	TATA-binding protein-associated factor 172	2	0.728687	37.8465	0.640379	173.449	0.461445	54.5156
27765085	NP_775083.1	CAST	calpastatin isoform b	4	0.969565	25.6807	0.640046	35.7995	0.58302	64.5618
55953125	NP_057188.2	RWDD1	RWD domain-containing protein 1 isoform b	1	0.920791	n/a	0.639077	n/a		n/a
164663805	NP_689850.2	METTL7B	methyltransferase-like protein 7B precursor	1	0.755796	n/a	0.638971	n/a	0.49082	n/a
307078125	NP_001182485.1	CLINT1	clathrin interactor 1 isoform 3	3	0.589095	n/a	0.638667	n/a	0.657346	n/a
39725634	NP_056130.2	LARP1	la-related protein 1	2	1.56623	34.2077	0.638608	43.0505	0.52026	17.0398
19743823	NP_596867.1	ITGB1	integrin beta-1 isoform 1A precursor	15	0.967725	6.82564	0.637935	56.4548	0.557201	95.5137
4503521	NP_001559.1	EIF3E	eukaryotic translation initiation factor 3 subunit E	4	1.42257	63.9752	0.63702	88.0675	0.455427	20.3854
5454140	NP_006283.1	TSG101	tumor susceptibility gene 101 protein	2	0.942763	0.953813	0.636483	30.5233	0.590876	19.3318
29826291	NP_816929.1	CASC4	protein CASC4 isoform b	1	1.06216	n/a	0.636331	n/a	0.624417	n/a
503774366	NP_001265145.1	CDK5RAP3	CDK5 regulatory subunit-associated protein 3 isoform e	3	0.925065	3.84274	0.636207	38.788	0.607803	40.7501
322302755	NP_001189788.1	SHC1	SHC-transforming protein 1 isoform 5 precursor	2	1.03442	2.94368	0.635088	15.4097	0.565246	9.3539
5729838	NP_006521.1	YEATS4	YEATS domain-containing protein 4	1	0.644887	n/a	0.634858	n/a	0.829231	n/a
229094128	NP_001153218.1	ABR	active breakpoint cluster region-related protein isoform c	4	0.990806	5.38842	0.634746	74.8107	0.553472	88.5928
33356148	NP_005883.2	FMNL1	formin-like protein 1	2	1.09931	4.83787	0.634365	294.722	1.86176	n/a
112380628	NP_005552.3	LAMP1	lysosome-associated membrane glycoprotein 1 precursor	2	0.966811	3.8181	0.63417	23.858	0.62998	14.2406
116812630	NP_064580.2	SDR39U1	epimerase family protein SDR39U1	1	0.885808	n/a	0.632746	n/a	0.518193	n/a
4505289	NP_002452.1	MVD	diphosphomevalonate decarboxylase	2	0.907989	18.7069	0.632714	75.2716	0.619664	36.7604
11761629	NP_068657.1	FGA	fibrinogen alpha chain isoform alpha preproprotein	20	0.979952	20.2553	0.631893	51.9718	0.773224	79.3381
332000017	NP_001193639.1	PRKAG1	5'-AMP-activated protein kinase subunit gamma-1 isoform 4	2	0.838485	n/a	0.631227	n/a	0.668378	n/a
47604944	NP_060458.3	SCYL2	SCY1-like protein 2	1	0.591967	n/a	0.631058	n/a		n/a
119703755	NP_002283.3	LAMB2	laminin subunit beta-2 precursor	3	1.18317	n/a	0.63093	n/a	0.326761	n/a
4503481	NP_001395.1	EEF1G	elongation factor 1-gamma	4	0.971083	3.29996	0.630721	172.981	0.62093	217.671
283806625	NP_001164562.1	UBXN6	UBX domain-containing protein 6 isoform 2	1	0.915404	n/a	0.630666	n/a	0.603932	n/a
5453990	NP_006254.1	PSME1	proteasome activator complex subunit 1 isoform 1	10	0.990913	37.8014	0.630465	34.1854	0.703528	56.6713
82546845	NP_067585.2	BCR	breakpoint cluster region protein isoform 2	1	1.06688	n/a	0.629626	n/a		n/a
5453832	NP_006380.1	HYOU1	hypoxia up-regulated protein 1 precursor	9	0.954616	11.0976	0.628006	162.66	0.542751	160.53
359718987	NP_001240795.1	YME1L1	ATP-dependent zinc metalloprotease YME1L1 isoform 4	2	0.820458	48.7831	0.627996	31.558	0.85391	49.5965
4502875	NP_001297.1	CLDN3	claudin-3	3	0.88155	3.36575	0.627813	29.3565	0.620828	23.4926
24430155	NP_694546.1	PSMC4	26S protease regulatory subunit 6B isoform 2	3	0.990905	11.2973	0.627648	87.2718	0.575544	83.7085
283945604	NP_001164604.1	FAM3A	protein FAM3A isoform 2	1	0.857244	n/a	0.626599	n/a	0.530202	n/a
119220575	NP_001072986.1	MED24	mediator of RNA polymerase II transcription subunit 24 isoform 2	1	0.517803	n/a	0.625532	n/a	0.865053	n/a
23510340	NP_695012.1	UBA1	ubiquitin-like modifier-activating enzyme 1	18	0.94809	6.21619	0.624929	290.358	0.525278	325.591
66933016	NP_000875.2	IMPDH2	inosine-5'-monophosphate dehydrogenase 2	7	1.11954	12.4358	0.624583	225.854	1.12578	72.283
5803145	NP_006779.1	RALBP1	ralA-binding protein 1	2	1.04598	n/a	0.624238	n/a	0.612085	n/a
4503729	NP_002005.1	FKBP4	peptidyl-prolyl cis-trans isomerase FKBP4	7	0.94462	22.3586	0.623845	172.697	0.804192	148.051
6005830	NP_009114.1	PKP3	plakophilin-3	4	0.781213	4.39592	0.623602	70.5816	0.530652	74.0263
32455273	NP_006639.3	WNK2	serine/threonine-protein kinase WNK2	1	1.27732	n/a	0.623599	n/a		n/a
40254924	NP_060979.2	LRRC59	leucine-rich repeat-containing protein 59	6	0.998137	6.7384	0.62173	51.0724	0.58789	27.431
4557269	NP_000017.1	ADSL	adenylosuccinate lyase isoform a	3	0.909885	7.03379	0.620076	76.6041	0.49299	98.4667
20357556	NP_612632.1	CTTN	src substrate cortactin isoform b	4	0.981538	50.2231	0.619525	9.62272	0.746417	45.8662
7706617	NP_057725.1	GDE1	glycerophosphodiester phosphodiesterase 1	1	1.10502	n/a	0.618491	n/a	0.920067	n/a
167614506	NP_002289.2	LCP1	plastin-2	9	0.971131	9.89603	0.618345	119.895	0.531021	100.494
4758032	NP_004757.1	COPB2	coatomer subunit beta'	12	0.946123	15.4079	0.618311	71.176	0.471777	71.8685
11863154	NP_001646.2	ARCN1	coatomer subunit delta isoform 1	10	0.862553	14.9399	0.617139	101.956	0.49875	163.484
39780552	NP_060522.3	VAC14	protein VAC14 homolog	3	0.972937	n/a	0.616943	36.2359	0.472306	n/a
332634596	NP_001193809.1	MRVI1	protein MRVI1 isoform e	1	1.90227	n/a	0.616545	n/a	0.927632	n/a
156564401	NP_006169.2	NSF	vesicle-fusing ATPase	8	1.03337	8.54887	0.615989	46.785	0.521009	61.1274
25453472	NP_001951.2	EEF1D	elongation factor 1-delta isoform 2	3	0.861007	16.2282	0.615944	5.94906	0.59733	5.14303
4757876	NP_004326.1	BST2	bone marrow stromal antigen 2	1	0.934534	n/a	0.615715	n/a	0.653541	n/a
211938442	NP_001130013.1	APOL1	apolipoprotein L1 isoform c	1	0.832309	n/a	0.615224	n/a	0.575277	n/a
5729913	NP_006690.1	MAN1A2	mannosyl-oligosaccharide 1,2-alpha-mannosidase IB	1	0.931356	n/a	0.613992	n/a	0.54452	n/a
8922701	NP_060708.1	AGK	acylglycerol kinase, mitochondrial precursor	1	1.08789	n/a	0.61392	n/a	0.320722	n/a
109148542	NP_001596.2	AARS	alanine--tRNA ligase, cytoplasmic	15	0.953323	15.6957	0.613156	109.847	0.581813	136.994
110556640	NP_598375.2	HELQ	helicase POLQ-like	1	0.93135	0.883276	0.612616	18.0626	0.578215	21.1171
7706349	NP_057155.1	MRPS33	28S ribosomal protein S33, mitochondrial	1	0.80641	n/a	0.612079	n/a	0.573976	n/a
253795516	NP_001156737.1	PCYT1B	choline-phosphate cytidylyltransferase B isoform 3	1	0.997427	4.41358	0.611805	8.7745	0.701943	6.41782
269847874	NP_073739.3	YTHDC2	probable ATP-dependent RNA helicase YTHDC2	2	0.981178	0.67267	0.611712	207.354	0.91081	71.657
4502209	NP_001653.1	ARF5	ADP-ribosylation factor 5	1	0.794724	n/a	0.61162	n/a	0.698665	n/a
100913030	NP_000103.2	SLC26A2	sulfate transporter	2	0.914075	16.774	0.610066	58.8025	0.546146	57.1846
188528628	NP_149100.2	PNPT1	polyribonucleotide nucleotidyltransferase 1, mitochondrial precursor	1	0.889084	n/a	0.609752	n/a	0.577935	n/a
21362062	NP_115744.2	LZIC	protein LZIC	2	0.889878	1.40654	0.609518	2.27699	0.866832	40.7348
58219054	NP_001010922.1	BCL2L15	bcl-2-like protein 15	2	0.926975	5.63382	0.609194	24.1177	1.09946	126.495
116686114	NP_060141.3	FERMT1	fermitin family homolog 1	2	0.986278	13.0385	0.60746	8.4996	0.648906	15.7542
315113860	NP_001186685.1	PPP2R5A	serine/threonine-protein phosphatase 2A 56 kDa regulatory subunit alpha isoform isoform 2	3	1.16376	n/a	0.606337	n/a	0.912785	n/a
51173713	NP_001003407.1	ABLIM1	actin-binding LIM protein 1 isoform b	1	3.40308	n/a	0.60342	n/a	0.832867	n/a
14149734	NP_065174.1	CORO1B	coronin-1B	4	0.952694	1.66537	0.602703	92.7726	0.573286	102.766
16757970	NP_443198.1	FAM129A	protein Niban	3	0.942718	2.25192	0.601215	304.793	1.75008	n/a
115511049	NP_002058.2	GNA11	guanine nucleotide-binding protein subunit alpha-11	2	0.91165	6.11639	0.600349	45.2124	0.564737	45.6036
24308073	NP_056281.1	PTPN23	tyrosine-protein phosphatase non-receptor type 23	5	0.980678	18.9431	0.600167	6.97396	0.621111	24.293
47132581	NP_997636.1	PRKAR1A	cAMP-dependent protein kinase type I-alpha regulatory subunit isoform a	3	1.10143	1.98435	0.599819	29.3317	0.650554	57.1326
4885375	NP_005310.1	HIST1H1C	histone H1.2	11	0.958994	11.7993	0.599005	63.7816	0.603849	54.4657
303519091	NP_001181988.1	PLEKHO2	pleckstrin homology domain-containing family O member 2 isoform 2	2	0.980216	9.25446	0.598117	n/a	0.472452	n/a
313760624	NP_000433.4	PECAM1	platelet endothelial cell adhesion molecule precursor	4	0.888023	37.367	0.597734	157.042	0.836951	40.976
291167764	NP_001166936.1	KIF21A	kinesin-like protein KIF21A isoform 4	2	0.948115	9.08864	0.596988	71.6176	0.702938	71.2738
282398127	NP_001164192.1	BCAR1	breast cancer anti-estrogen resistance protein 1 isoform 9	1	0.898583	n/a	0.596457	n/a	0.659764	n/a
77404397	NP_055205.2	SND1	staphylococcal nuclease domain-containing protein 1	14	0.984633	9.01227	0.596198	248.468	0.55931	113.553
18104964	NP_542157.1	CAPS	calcyphosin isoform b	3		n/a	0.595185	n/a		n/a
5901926	NP_008937.1	NUDT21	cleavage and polyadenylation specificity factor subunit 5	1	0.918889	n/a	0.594569	n/a	0.643471	n/a
115527097	NP_006026.3	CDC42BPB	serine/threonine-protein kinase MRCK beta	3	1.0641	9.72464	0.594505	1.91193	0.624434	4.35996
383872538	NP_001244329.1	CD63	CD63 antigen isoform D precursor	1	1.24799	n/a	0.593273	n/a	0.542615	n/a
18105056	NP_075067.2	VPS33A	vacuolar protein sorting-associated protein 33A	1	0.810565	n/a	0.59325	n/a	0.481211	n/a
23111032	NP_683758.1	SNX1	sorting nexin-1 isoform b	5	1.02793	16.9198	0.592357	151.996	0.712746	26.3396
20127551	NP_057197.2	TRPV2	transient receptor potential cation channel subfamily V member 2	1	0.741077	n/a	0.591888	n/a	0.634635	n/a
32698686	NP_055383.1	GALNT5	polypeptide N-acetylgalactosaminyltransferase 5	2	0.990015	n/a	0.591463	n/a	0.623256	n/a
4506085	NP_002745.1	MAPK13	mitogen-activated protein kinase 13	3	0.902837	3.27244	0.590826	18.8304	0.537326	6.20706
148529014	NP_001914.3	DDB1	DNA damage-binding protein 1	13	0.992745	30.6403	0.590383	72.3181	0.656962	78.4967
167614485	NP_006102.2	ACAA2	3-ketoacyl-CoA thiolase, mitochondrial	14	0.982869	18.078	0.590327	75.768	0.66859	53.9033
32454741	NP_001226.2	SERPINH1	serpin H1 precursor	6	0.915093	35.8896	0.590251	126.198	0.612994	156.634
154240704	NP_001093859.1	TMEM192	transmembrane protein 192	1	0.95099	n/a	0.58891	n/a	0.602225	n/a
4504957	NP_002285.1	LAMP2	lysosome-associated membrane glycoprotein 2 isoform A precursor	1	1.19151	n/a	0.588414	n/a	0.499562	n/a
19718759	NP_579899.1	MYOF	myoferlin isoform b	5	0.972508	1.22166	0.588147	52.6735	0.566442	52.8314
21237748	NP_004348.2	CD151	CD151 antigen	2	0.973368	0.814081	0.587015	87.3117	0.589039	76.1485
65301112	NP_001018003.1	SORBS3	vinexin isoform 2	1	0.887021	n/a	0.586043	n/a	0.598145	n/a
260656034	NP_001159582.1	PALLD	palladin isoform 4	1	0.909044	n/a	0.585764	n/a	0.604635	n/a
4557014	NP_001743.1	CAT	catalase	13	0.919601	8.17869	0.585423	59.36	0.537433	68.4764
344030221	NP_001230656.1	TEX264	testis-expressed sequence 264 protein isoform 2	1	0.986694	n/a	0.584157	n/a	0.744476	n/a
68509926	NP_001349.2	DHX15	putative pre-mRNA-splicing factor ATP-dependent RNA helicase DHX15	7	1.04357	7.08406	0.583702	268.098	0.547725	234.667
31621305	NP_573566.2	LRPPRC	leucine-rich PPR motif-containing protein, mitochondrial precursor	21	0.974694	16.1574	0.583361	146.477	0.642567	127.116
40068479	NP_079140.2	MRM1	rRNA methyltransferase 1, mitochondrial precursor	1	1.02282	n/a	0.582747	n/a	0.65502	n/a
5031697	NP_005594.1	ATP8B1	probable phospholipid-transporting ATPase IC	4	1.01908	33.5876	0.582683	69.4255	0.31437	129.566
40068469	NP_945176.1	PTGES2	prostaglandin E synthase 2 isoform 2	1	0.71487	115.669	0.582223	127.557	0.730758	363.495
49355721	NP_055182.3	FAM162A	protein FAM162A	2	0.749974	4.80301	0.581845	3489.84	0.536362	5107.18
9966827	NP_065090.1	PCNP	PEST proteolytic signal-containing nuclear protein	1	0.990051	n/a	0.581628	n/a	0.552591	n/a
324021716	NP_001191213.1	PPP5C	serine/threonine-protein phosphatase 5 isoform 2	1	0.833124	n/a	0.581017	n/a	0.51369	n/a
20149560	NP_004595.2	STX4	syntaxin-4 isoform 3	4	0.647773	n/a	0.579487	99.0716	0.442528	86.8036
20149663	NP_068597.2	CCDC90B	coiled-coil domain-containing protein 90B, mitochondrial precursor	1	0.952748	n/a	0.579198	n/a	0.805385	n/a
38045944	NP_937838.1	UBA3	NEDD8-activating enzyme E1 catalytic subunit isoform 2	1	0.759989	n/a	0.578663	n/a	0.808338	n/a
48375180	NP_001001548.1	CD36	platelet glycoprotein 4	2	0.576224	n/a	0.577743	n/a	1.05199	n/a
157738665	NP_116178.2	PARP10	poly [ADP-ribose] polymerase 10	1	0.843664	n/a	0.576709	n/a	0.620001	n/a
41152506	NP_065173.2	PTGFRN	prostaglandin F2 receptor negative regulator precursor	3	1.22425	33.9703	0.57537	37.2605	0.689503	67.9464
154146189	NP_055504.2	DOCK10	dedicator of cytokinesis protein 10	2	1.25803	n/a	0.574209	n/a	0.518593	n/a
5174449	NP_006017.1	H1FX	histone H1x	6	0.923754	6.93175	0.573537	379.774	0.652959	460.734
315434271	NP_001186763.1	VCAM1	vascular cell adhesion protein 1 isoform c precursor	1	0.870022	n/a	0.573202	n/a	0.639002	n/a
4506003	NP_002699.1	PPP1CA	serine/threonine-protein phosphatase PP1-alpha catalytic subunit isoform 1	2	1.01275	2.75298	0.571973	75.1018	0.498892	73.9441
13449277	NP_085125.1	CYP2S1	cytochrome P450 2S1 precursor	2	1.02738	n/a	0.571694	n/a	0.967759	n/a
222080062	NP_066552.2	NDUFV2	NADH dehydrogenase [ubiquinone] flavoprotein 2, mitochondrial precursor	3	1.18064	39.8089	0.5716	n/a	0.387559	47.0898
15011974	NP_004714.2	ARHGEF2	rho guanine nucleotide exchange factor 2 isoform 3	1	0.752479	n/a	0.571478	n/a	0.520235	n/a
296841075	NP_001171895.1	WDR44	WD repeat-containing protein 44 isoform 3	2	0.997948	1.84148	0.570627	53.127	0.575049	17.7693
4506613	NP_000974.1	RPL22	60S ribosomal protein L22 proprotein	7	0.957586	4.35317	0.570111	76.4026	0.614197	55.1068
4505541	NP_003706.1	USO1	general vesicular transport factor p115	10	0.963328	5.36274	0.569342	75.3162	0.492831	101.972
110611233	NP_569712.2	COL18A1	collagen alpha-1(XVIII) chain isoform 2 precursor	2	0.815309	4.37936	0.569285	11.2347	0.45847	28.9176
349732186	NP_001231825.1	PTBP3	polypyrimidine tract-binding protein 3 isoform 4	1	0.715324	n/a	0.566576	n/a	2.42912	n/a
5174513	NP_005893.1	SMAD3	mothers against decapentaplegic homolog 3 isoform 1	2	0.403407	4.49198	0.566421	n/a	1.26693	n/a
4885585	NP_005491.1	SAE1	SUMO-activating enzyme subunit 1 isoform a	1	0.866548	n/a	0.566183	n/a	0.532318	n/a
21536301	NP_644671.1	STAT1	signal transducer and activator of transcription 1-alpha/beta isoform beta	6	1.05282	8.4542	0.566136	96.9021	0.468708	159.544
11342676	NP_004231.1	TRIP10	cdc42-interacting protein 4	2	0.957377	2.12378	0.565688	22.2291	0.346488	160.642
333440442	NP_001193963.1	RNF40	E3 ubiquitin-protein ligase BRE1B isoform 3	5	0.738816	68.0012	0.56328	19.9518	0.617763	13.3864
20270371	NP_620164.1	CMBL	carboxymethylenebutenolidase homolog	1	0.754717	n/a	0.562976	n/a	0.449996	n/a
255918129	NP_149977.2	LMF2	lipase maturation factor 2	1	1.10788	n/a	0.562748	n/a	0.80084	n/a
385648280	NP_001245313.1	IDH3B	isocitrate dehydrogenase [NAD] subunit beta, mitochondrial isoform d	1	0.780999	3.0351	0.562732	7.82002	0.578616	9.20519
122939167	NP_062559.2	WDR45B	WD repeat domain phosphoinositide-interacting protein 3	1	1.05407	n/a	0.562582	n/a	0.362666	n/a
68160937	NP_005073.2	TRIM25	E3 ubiquitin/ISG15 ligase TRIM25	15	0.922059	10.5564	0.561516	130.558	0.523367	150.561
7657649	NP_055362.1	TMOD3	tropomodulin-3	4	0.927603	11.745	0.561076	46.4929	0.413242	63.5848
378548190	NP_001243731.1	RPS3	40S ribosomal protein S3 isoform 1	13	0.931829	7.38381	0.56095	537.961	0.481885	514.191
71361682	NP_006176.2	NUMA1	nuclear mitotic apparatus protein 1	22	0.955019	9.98096	0.560185	129.703	0.45362	141.221
224589127	NP_060596.2	TMEM33	transmembrane protein 33	1	0.941788	n/a	0.559106	n/a	0.541093	n/a
4504511	NP_001530.1	DNAJA1	dnaJ homolog subfamily A member 1	2	1.00109	7.57669	0.557812	77.7323	0.471344	83.4631
4503131	NP_001895.1	CTNNB1	catenin beta-1	7	1.00142	6.98343	0.557473	29.9319	0.644421	40.3459
178557739	NP_001002029.3	C4B	complement C4-B preproprotein	15	0.971636	8.71883	0.557097	105.971	0.565708	130.658
16262452	NP_065821.1	CGN	cingulin	6	0.997762	5.67742	0.556773	28.5616	0.608083	29.9465
399498492	NP_001257770.1	CRIP2	cysteine-rich protein 2 isoform 3	1	0.943012	n/a	0.556204	n/a	0.532634	n/a
6005717	NP_009031.1	ATP5I	ATP synthase subunit e, mitochondrial	2	0.972024	0.283272	0.555706	10.3275	0.518256	13.7149
394953908	NP_001257411.1	PSMD11	26S proteasome non-ATPase regulatory subunit 11	2	0.988431	11.7735	0.555031	25.1274	0.567233	8.63945
21361633	NP_060238.3	LRRC40	leucine-rich repeat-containing protein 40	2	1.01682	n/a	0.554482	n/a	0.512389	n/a
7661922	NP_055814.1	RAB21	ras-related protein Rab-21	1	0.528919	n/a	0.5544	n/a	0.486698	n/a
401664560	NP_001257903.1	HYDIN	hydrocephalus-inducing protein homolog isoform a	1	1.00315	n/a	0.553525	n/a	0.502477	n/a
209862837	NP_001129490.1	EPHX1	epoxide hydrolase 1 precursor	2	0.880458	n/a	0.552587	n/a	0.499392	n/a
355594753	NP_001822.3	CLU	clusterin preproprotein	9	1.02383	23.7234	0.552072	49.7492	0.555201	71.0168
148727247	NP_003472.2	USP5	ubiquitin carboxyl-terminal hydrolase 5 isoform 2	3	0.775011	0.783116	0.551841	9.61812	0.512667	11.1773
6631100	NP_005376.2	NKTR	NK-tumor recognition protein	1	0.976089	n/a	0.550854	n/a	0.541543	n/a
33239445	NP_003742.2	EIF3B	eukaryotic translation initiation factor 3 subunit B	5	0.9803	7.39563	0.550286	163.227	0.533655	185.792
49574502	NP_057327.2	CYB5R1	NADH-cytochrome b5 reductase 1	1	0.996629	n/a	0.550136	n/a	0.573572	n/a
56237029	NP_002196.2	ITGA5	integrin alpha-5 precursor	2	1.05766	7.14561	0.549454	n/a	0.329384	863.112
76496472	NP_001029025.1	RPL3	60S ribosomal protein L3 isoform b	12	0.955334	8.859	0.549074	76.224	0.580641	64.4081
324120898	NP_001191297.1	MGST2	microsomal glutathione S-transferase 2 isoform 3 precursor	1	1.01396	4.72866	0.548313	12.1544	0.5195	10.2737
21493029	NP_009131.2	AKAP13	A-kinase anchor protein 13 isoform 2	2	1.00205	n/a	0.547832	n/a	0.442168	n/a
6005824	NP_009121.1	SEC23IP	SEC23-interacting protein	4	0.796375	17.5041	0.547324	60.0295	0.445237	55.9888
4758332	NP_004449.1	ACSL4	long-chain-fatty-acid--CoA ligase 4 isoform 1	2	1.08562	36.2856	0.547111	14.9815	0.566304	n/a
19923106	NP_000437.3	PON1	serum paraoxonase/arylesterase 1 precursor	1	0.957626	3.7723	0.546856	n/a	0.543786	n/a
110347443	NP_009045.2	TMF1	TATA element modulatory factor	3	0.762099	123.448	0.546849	87.216	0.411942	4.48338
25777730	NP_000683.3	ALDH1B1	aldehyde dehydrogenase X, mitochondrial precursor	2	1.56388	62.7167	0.545681	1322.56	0.583067	1266.26
72534712	NP_001026881.1	ERGIC1	endoplasmic reticulum-Golgi intermediate compartment protein 1	2	0.932252	n/a	0.545209	n/a	0.401181	n/a
4507357	NP_003555.1	TAGLN2	transgelin-2 isoform b	5	0.936895	4.50052	0.545184	454.912	0.580796	599.116
82546879	NP_004277.2	GTPBP1	GTP-binding protein 1	1	1.05707	n/a	0.543967	n/a	0.569096	n/a
110611220	NP_004578.2	RRBP1	ribosome-binding protein 1	34	0.986876	9.14399	0.543553	111.703	0.541172	122.521
90819233	NP_001035089.1	MLLT4	afadin isoform 2	2	0.978409	24.3992	0.541538	78.3951	0.425896	107.168
23110939	NP_687033.1	PSMA3	proteasome subunit alpha type-3 isoform 2	2	1.02156	27.1291	0.540745	127.286	0.514184	140.706
358001101	NP_001239579.1	RDH11	retinol dehydrogenase 11 isoform 2 precursor	2	0.924205	26.3943	0.54051	178.7	0.569202	50.3938
157389005	NP_001739.2	CAPN2	calpain-2 catalytic subunit isoform 1	11	0.969578	17.9529	0.54035	121.35	0.55885	93.5769
4506189	NP_002783.1	PSMA7	proteasome subunit alpha type-7	5	0.881019	10.1472	0.539696	120.205	0.485804	123.287
119395742	NP_000201.2	ITGA6	integrin alpha-6 isoform b precursor	7	1.00798	28.5295	0.53946	34.1093	0.590417	7.46763
506325748	NP_001265164.1	LMCD1	LIM and cysteine-rich domains protein 1 isoform 4	1	0.938508	n/a	0.539177	n/a	0.53695	n/a
221316593	NP_004054.3	CDH17	cadherin-17 precursor	21	0.961113	9.15575	0.53908	81.059	0.553842	72.004
53831995	NP_001005409.1	SF3A1	splicing factor 3A subunit 1 isoform 2	6	0.916166	7.43994	0.537997	211.782	0.476768	164.402
7662352	NP_055776.1	RUFY3	protein RUFY3 isoform 2	1	1.02046	n/a	0.537705	n/a	0.580004	n/a
485836818	NP_001264891.1	STIM1	stromal interaction molecule 1 isoform 3 precursor	1	0.910099	n/a	0.537574	n/a	0.562644	n/a
47132587	NP_659477.2	PRKCDBP	protein kinase C delta-binding protein	4	0.886193	8.10017	0.537558	55.5001	0.61065	22.7839
4557839	NP_000294.1	PMM2	phosphomannomutase 2	2	1.04674	n/a	0.537103	n/a	0.645944	42.2755
375331941	NP_001243599.1	DPP3	dipeptidyl peptidase 3 isoform 2	3	0.972438	11.3599	0.536742	n/a	1.05373	n/a
297139703	NP_059989.2	ARID1B	AT-rich interactive domain-containing protein 1B isoform 1	1	0.936965	n/a	0.536646	n/a	0.521342	n/a
51873031	NP_064555.2	NCLN	nicalin precursor	2	0.85609	n/a	0.535938	n/a	0.305389	n/a
40548322	NP_954976.1	ARHGAP27	rho GTPase-activating protein 27 isoform a	1	1.01849	n/a	0.535258	n/a	0.522889	n/a
25777732	NP_000681.2	ALDH2	aldehyde dehydrogenase, mitochondrial isoform 1 precursor	8	0.953521	7.57074	0.534598	36.2684	0.505219	40.2891
24119203	NP_705935.1	TPM3	tropomyosin alpha-3 chain isoform 2	11	0.963549	7.1456	0.534119	43.6855	0.478555	36.0924
4759050	NP_004577.1	RPS6KA3	ribosomal protein S6 kinase alpha-3	2	0.977087	2.13032	0.533533	104.082	0.634827	70.8417
4504111	NP_002077.1	GRB2	growth factor receptor-bound protein 2 isoform 1	2	0.974445	10.0563	0.532578	n/a	0.582636	n/a
23510421	NP_690610.1	FAS	tumor necrosis factor receptor superfamily member 6 isoform 2 precursor	1	0.493795	n/a	0.532349	n/a	0.630031	n/a
4557888	NP_000215.1	KRT18	keratin, type I cytoskeletal 18	30	0.939264	9.75347	0.532245	79.0011	0.503773	66.1776
4504169	NP_000169.1	GSS	glutathione synthetase	6	0.859301	11.8844	0.531929	253.35	0.518117	373.846
237649049	NP_808210.2	SNRPD2	small nuclear ribonucleoprotein Sm D2 isoform 2	3	0.92005	2.9863	0.531847	40.5718	0.50518	50.8835
34147513	NP_004628.4	RAB7A	ras-related protein Rab-7a	3	0.924193	20.295	0.531132	7.43024	0.494216	51.7292
163644321	NP_005994.2	UQCRFS1	cytochrome b-c1 complex subunit Rieske, mitochondrial	3	0.889789	10.5865	0.530744	n/a	0.542792	n/a
10337585	NP_066290.1	DEFA5	defensin-5 preproprotein	1	1.33752	n/a	0.530373	n/a	0.440621	n/a
153945846	NP_002215.2	ITPR3	inositol 1,4,5-trisphosphate receptor type 3	2	1.09856	n/a	0.52847	n/a		n/a
28302131	NP_000550.2	HBG1	hemoglobin subunit gamma-1	1	1.10115	18.4711	0.527755	11.5113	0.501489	3.66103
52145310	NP_004276.2	H6PD	GDH/6PGL endoplasmic bifunctional protein precursor	1	0.991834	n/a	0.52748	n/a	0.802137	n/a
300360515	NP_001177925.1	ARPC1A	actin-related protein 2/3 complex subunit 1A isoform 2	2	0.919468	10.3632	0.527426	118.927	0.480037	88.0539
342349321	NP_001230140.1	IL18	interleukin-18 isoform 2 proprotein	1	1.04348	n/a	0.526685	n/a	0.24796	n/a
154354966	NP_001093640.1	IMMT	mitochondrial inner membrane protein isoform 3	12	0.939248	11.499	0.526553	45.2692	0.561975	55.4702
114688046	NP_055647.2	TBC1D4	TBC1 domain family member 4	2	0.917877	n/a	0.526082	n/a	0.789074	n/a
148839305	NP_056110.2	SMCHD1	structural maintenance of chromosomes flexible hinge domain-containing protein 1	1	0.803543	n/a	0.525293	n/a	0.710407	n/a
30410792	NP_002809.2	PSME2	proteasome activator complex subunit 2	5	0.909689	10.5921	0.525081	18.223	0.478163	34.2565
54873613	NP_940978.2	AGRN	agrin precursor	2	0.783876	28.5126	0.524741	149.812	0.499305	81.4108
154759259	NP_003118.2	SPTAN1	spectrin alpha chain, non-erythrocytic 1 isoform 2	59	0.944749	12.1339	0.524565	73.2636	0.525666	74.1435
62241044	NP_056034.2	EXOC7	exocyst complex component 7 isoform 2	2	1.00099	n/a	0.524504	n/a	0.503893	n/a
7705773	NP_057093.1	SH3GLB1	endophilin-B1 isoform 1	3	0.892459	1.41154	0.523561	20.1388	0.618008	73.2303
510785742	NP_001265371.1	ILK	integrin-linked protein kinase isoform 3	2	0.71448	n/a	0.523331	n/a	0.430797	n/a
26667186	NP_742125.1	CAMK2D	calcium/calmodulin-dependent protein kinase type II subunit delta isoform 1	4	0.931112	0.733589	0.52293	29.3637	0.478602	11.9199
4826962	NP_005043.1	RAC3	ras-related C3 botulinum toxin substrate 3	4	0.966005	4.91024	0.522845	3.60443	0.519653	10.3663
4505185	NP_002406.1	MIF	macrophage migration inhibitory factor	1	1.20371	53.3067	0.522833	36.3871	0.470459	19.3275
4505531	NP_002547.1	OSBP	oxysterol-binding protein 1	3	0.972744	10.6935	0.522496	38.9018	0.545613	30.721
55749577	NP_001142.2	SLC25A4	ADP/ATP translocase 1	3	0.775443	4.96744	0.521295	84.2291	0.506372	105.632
260436864	NP_001159491.1	AP1B1	AP-1 complex subunit beta-1 isoform c	4	0.928712	6.14441	0.521253	139.237	0.958596	9.35632
13491166	NP_055491.1	PUM1	pumilio homolog 1 isoform 2	2	0.953362	n/a	0.521234	n/a	0.424668	n/a
378786666	NP_001243766.1	QTRTD1	queuine tRNA-ribosyltransferase subunit QTRTD1 isoform 4	1	0.995504	n/a	0.520993	n/a	0.262214	n/a
62912453	NP_001112.2	ADD3	gamma-adducin isoform b	5	0.811786	36.3852	0.520891	231.053	0.502369	11063.7
56090588	NP_001007524.1	F8A2	factor VIII intron 22 protein	1	1.04279	n/a	0.520472	n/a	0.531787	n/a
7657176	NP_055070.1	CNPY2	protein canopy homolog 2 isoform 1 precursor	2	0.931371	10.1691	0.520313	68.1351	0.386485	33.7784
48762932	NP_006576.2	CCT8	T-complex protein 1 subunit theta	12	0.942433	32.6119	0.520039	109.213	0.525496	134.203
187607364	NP_001119809.1	TUFT1	tuftelin isoform 2	1	0.942264	n/a	0.51924	n/a	0.512705	n/a
223468630	NP_001138551.1	COG6	conserved oligomeric Golgi complex subunit 6 isoform 2	1	0.816694	n/a	0.519114	n/a	0.199546	n/a
73623028	NP_001027017.1	CPT1A	carnitine O-palmitoyltransferase 1, liver isoform isoform 2	7	0.916302	13.4449	0.519089	52.4669	0.414222	17.3434
14149680	NP_056107.1	ESYT1	extended synaptotagmin-1 isoform 2	6	1.0116	12.1421	0.518888	180.966	0.547123	178.687
32483363	NP_863659.1	APAF1	apoptotic protease-activating factor 1 isoform e	1	0.920321	n/a	0.518222	n/a	0.727587	n/a
4506589	NP_003720.1	RTCA	RNA 3'-terminal phosphate cyclase isoform b	1	0.993019	n/a	0.517904	n/a	0.586945	n/a
4502303	NP_001688.1	ATP5O	ATP synthase subunit O, mitochondrial precursor	8	0.967266	12.2505	0.517883	141.437	0.362806	279.156
41350216	NP_061982.3	ALG1	chitobiosyldiphosphodolichol beta-mannosyltransferase	1	0.967475	n/a	0.517702	n/a	0.757677	n/a
374532823	NP_001243417.1	GOLGB1	Golgin subfamily B member 1 isoform 4	12	0.981074	13.521	0.517139	29.9451	0.497309	7.20293
9966881	NP_065134.1	NUP107	nuclear pore complex protein Nup107	4	1.18872	n/a	0.517017	32.2998	0.632467	132.841
7661690	NP_056418.1	CCDC9	coiled-coil domain-containing protein 9	2	0.831831	21.2781	0.516745	35.4234	0.501398	64.5297
4557587	NP_000128.1	FAH	fumarylacetoacetase	2	0.95026	5.15935	0.516727	93.1045	0.509153	91.2416
14165469	NP_001010.2	RPS15A	40S ribosomal protein S15a	2	0.83433	5.44483	0.515682	67.4236	0.329389	537.898
213417919	NP_001132990.1	PRKRA	interferon-inducible double stranded RNA-dependent protein kinase activator A isoform 3	3	0.866027	n/a	0.51537	n/a	0.605702	n/a
47458041	NP_998816.1	SLC25A24	calcium-binding mitochondrial carrier protein SCaMC-1 isoform 2	3	0.997639	5.80271	0.514852	215.198	0.482163	237.607
38569394	NP_003631.2	IKBKAP	elongator complex protein 1	1	0.91265	n/a	0.514312	n/a	0.38565	n/a
31563507	NP_852118.1	GCC2	GRIP and coiled-coil domain-containing protein 2	4	0.52974	54.1748	0.513687	26.8088	0.374957	54.2393
157779135	NP_003839.2	SUCLG2	succinyl-CoA ligase [GDP-forming] subunit beta, mitochondrial isoform 2 precursor	21	0.929446	6.47011	0.513682	105.846	0.329168	119.83
5730120	NP_006546.1	YKT6	synaptobrevin homolog YKT6	2	0.930644	3.79482	0.513529	20.3245	0.513808	10.9854
47524167	NP_998890.1	RPLP1	60S acidic ribosomal protein P1 isoform 2	1	0.541716	n/a	0.513388	n/a	0.312097	n/a
41352061	NP_055704.2	PITRM1	presequence protease, mitochondrial isoform 2 precursor	1	0.641781	n/a	0.513284	n/a	0.284079	n/a
392513659	NP_001254735.1	PAAF1	proteasomal ATPase-associated factor 1 isoform 3	1	1.18322	n/a	0.51293	n/a	0.536625	n/a
4502901	NP_001825.1	CLTB	clathrin light chain B isoform a	5	0.973014	6.0407	0.512262	88.993	0.496613	96.7915
126352700	NP_001075221.1	ELN	elastin isoform b precursor	1	0.784699	n/a	0.51112	n/a	0.584283	n/a
63055049	NP_060760.2	PGM2	phosphoglucomutase-2	4	1.0637	10.9246	0.510724	113.45	0.484305	112.36
7656991	NP_055140.1	CORO1C	coronin-1C isoform b	7	0.95713	5.6997	0.509761	93.842	0.503456	82.6512
296841095	NP_001171900.1	PACSIN2	protein kinase C and casein kinase substrate in neurons protein 2 isoform B	7	0.949073	7.60663	0.509202	19.2461	0.551659	14.5684
4502201	NP_001649.1	ARF1	ADP-ribosylation factor 1	1	1.41036	40.1227	0.509194	n/a		n/a
4826870	NP_005004.1	NUCB2	nucleobindin-2 precursor	3	0.809724	3.20665	0.50788	n/a	0.0923554	1222.13
324120938	NP_001191317.1	DLG1	disks large homolog 1 isoform 5	5	1.14497	4.47824	0.505651	171.826	0.593934	33.1147
42476013	NP_940916.2	NHLRC2	NHL repeat-containing protein 2	4	1.01694	16.4264	0.505621	71.3912	0.60345	65.0758
339275993	NP_001229835.1	ASCC2	activating signal cointegrator 1 complex subunit 2 isoform 2	1	1.05586	n/a	0.50553	n/a	0.689568	n/a
4758896	NP_004556.1	PEX14	peroxisomal membrane protein PEX14	2	0.624099	15.4163	0.505285	1.90365	0.417878	33.0635
379317177	NP_001243839.1	DDX21	nucleolar RNA helicase 2 isoform 2	4	1.15834	18.5212	0.504817	24.9043	0.626129	42.1827
29558099	NP_808908.1	PPM1B	protein phosphatase 1B isoform 3	1	0.93258	n/a	0.503878	n/a	0.618666	n/a
34577061	NP_000659.2	ADH1B	alcohol dehydrogenase 1B	6	0.977253	12.9611	0.50358	n/a	0.0891371	1563.32
68799814	NP_001020376.1	AP2M1	AP-2 complex subunit mu isoform b	2	0.910154	35.4021	0.503097	n/a	0.579796	n/a
110349750	NP_036345.2	MLYCD	malonyl-CoA decarboxylase, mitochondrial	1	1.20551	25.2892	0.503093	n/a	0.99892	n/a
193082993	NP_001122327.1	GTPBP3	tRNA modification GTPase GTPBP3, mitochondrial isoform III	1	1.10097	n/a	0.502899	n/a	0.563962	n/a
321267600	NP_001186851.1	SIAE	sialate O-acetylesterase isoform 2	3	0.913194	1.9449	0.502609	64.9892	0.430686	42.01
23957690	NP_705831.1	COG7	conserved oligomeric Golgi complex subunit 7	1	0.717161	n/a	0.501673	n/a	1.67632	n/a
6005764	NP_009209.1	GABARAP	gamma-aminobutyric acid receptor-associated protein	1	0.843218	n/a	0.501126	n/a	0.534645	n/a
116805340	NP_002038.2	GARS	glycine--tRNA ligase precursor	3	0.941261	9.09483	0.501043	13.5938	0.488587	10.1844
c053	TRYP_PIG			9	0.90581	10.9283	0.500725	343.446	0.780291	100.489
306774089	NP_001182408.1	TFG	protein TFG isoform 2	3	0.859208	22.1676	0.499065	10.1185	0.368947	11.4935
6912396	NP_036335.1	GRHPR	glyoxylate reductase/hydroxypyruvate reductase	3	0.933217	14.3135	0.497751	139.435	0.494127	115.494
116805327	NP_064551.3	MCCC1	methylcrotonoyl-CoA carboxylase subunit alpha, mitochondrial precursor	3	0.994231	7.58553	0.497739	16.1087	0.459412	12.7576
25306272	NP_733934.1	MRPL11	39S ribosomal protein L11, mitochondrial isoform b	5	0.923111	3.13249	0.497595	38.2136	0.426948	31.3077
7661872	NP_056155.1	LARS2	probable leucine--tRNA ligase, mitochondrial	1	1.04072	27.6007	0.496095	15.6375	0.456199	6.04073
46592991	NP_064522.3	GRIPAP1	GRIP1-associated protein 1 isoform 1	3	0.976449	5.19954	0.495668	69.671	0.509584	172.536
187828910	NP_001120695.1	CD59	CD59 glycoprotein preproprotein	2	0.954017	24.1142	0.495515	2.30299	0.523097	28.2262
4506179	NP_002777.1	PSMA1	proteasome subunit alpha type-1 isoform 2	3	0.962287	4.78011	0.495043	2.46752	0.546272	19.1767
4502337	NP_001176.1	AZGP1	zinc-alpha-2-glycoprotein precursor	4	0.931833	11.3106	0.494287	46.3933	0.41532	11.0261
8923946	NP_061137.1	SMPD3	sphingomyelin phosphodiesterase 3	1	1.31385	n/a	0.49351	n/a	0.571719	n/a
153791384	NP_001093115.1	RPL22L1	60S ribosomal protein L22-like 1	1	0.856228	n/a	0.49258	n/a	0.404065	n/a
215982794	NP_001135967.1	MYO5A	unconventional myosin-Va isoform 2	1	1.31614	n/a	0.490754	n/a	1.03357	n/a
299758394	NP_001177645.1	DNM2	dynamin-2 isoform 5	6	0.884865	23.3655	0.490671	18.3546	0.977543	83.8675
116063573	NP_001447.2	FLNA	filamin-A isoform 1	58	0.942145	11.1438	0.490476	158.333	0.462864	160.201
71051598	NP_057159.2	VPS36	vacuolar protein-sorting-associated protein 36	2	1.00531	n/a	0.490085	n/a	0.504016	n/a
5031875	NP_005563.1	LMNA	lamin isoform C	29	0.947768	6.99118	0.488998	146.985	0.459822	176.786
73486658	NP_002071.2	GOT2	aspartate aminotransferase, mitochondrial precursor	6	0.941112	2.6388	0.488989	136.917	0.477421	316.737
21328448	NP_647539.1	YWHAB	14-3-3 protein beta/alpha	3	0.941305	17.0024	0.488857	12.6002	0.338017	98.3961
21264616	NP_073609.2	EPS8L2	epidermal growth factor receptor kinase substrate 8-like protein 2	2	0.746708	n/a	0.487626	n/a	0.894688	n/a
30065649	NP_821070.1	PPP2R4	serine/threonine-protein phosphatase 2A activator isoform d	1	1.06909	n/a	0.487224	n/a		n/a
13775220	NP_112588.1	EMC6	ER membrane protein complex subunit 6	1	1.07022	n/a	0.486975	n/a	0.225877	n/a
14043022	NP_004981.2	MARS	methionine--tRNA ligase, cytoplasmic	4	1.01763	4.60783	0.485044	143.025	0.540591	169.006
109948304	NP_060695.2	SMU1	WD40 repeat-containing protein SMU1	3	0.903824	n/a	0.484897	n/a	0.461099	n/a
38373695	NP_003378.3	WIPF1	WAS/WASL-interacting protein family member 1	1	1.00732	n/a	0.484552	n/a	0.476704	n/a
166064062	NP_002546.3	SLC22A18	solute carrier family 22 member 18	1	0.88919	n/a	0.483033	n/a	0.556346	n/a
13375695	NP_078813.1	CARS2	probable cysteine--tRNA ligase, mitochondrial	1	0.75625	n/a	0.482909	n/a	0.732773	n/a
16445421	NP_443069.1	SCAMP3	secretory carrier-associated membrane protein 3 isoform 2	2	0.97591	n/a	0.482577	n/a	0.558136	n/a
289629267	NP_001166217.1	SEC23B	protein transport protein Sec23B isoform 2	2	1.09875	6.39456	0.482132	79.8096	0.493949	90.6815
187608516	NP_036419.3	ACAP2	arf-GAP with coiled-coil, ANK repeat and PH domain-containing protein 2	2	0.87964	13.8337	0.481736	175.274	0.483419	37.8058
4557809	NP_000265.1	OAT	ornithine aminotransferase, mitochondrial isoform 1 precursor	1	1.08966	n/a	0.480903	n/a	0.284737	n/a
148596953	NP_061877.1	ANKIB1	ankyrin repeat and IBR domain-containing protein 1	1	1.67931	n/a	0.479221	n/a	0.809285	n/a
21269877	NP_644802.1	CARS	cysteine--tRNA ligase, cytoplasmic isoform a	3	0.944106	31.0404	0.479174	137.237	0.429211	89.7
40254982	NP_113641.2	FAM107B	protein FAM107B	2	0.840254	n/a	0.478978	n/a	0.187186	n/a
19913428	NP_001684.2	ATP6V1B2	V-type proton ATPase subunit B, brain isoform	1	0.923415	n/a	0.47882	n/a	0.191154	n/a
11415052	NP_068811.1	RXRB	retinoic acid receptor RXR-beta isoform 2	2	0.697178	33.0019	0.478157	25.8704	0.544262	8.89885
4557325	NP_000032.1	APOE	apolipoprotein E precursor	8	1.01824	5.19035	0.477969	208.66	0.447464	212.6
24234699	NP_002267.2	KRT19	keratin, type I cytoskeletal 19	21	0.931803	9.51641	0.47783	96.6695	0.570876	70.3731
21687153	NP_660349.1	C10orf35	uncharacterized protein C10orf35	1	0.828497	n/a	0.47746	n/a	0.645239	n/a
5031561	NP_005805.1	GPA33	cell surface A33 antigen precursor	5	1.01459	18.6698	0.476647	14.6959	0.409006	76.1147
10863927	NP_066953.1	PPIA	peptidyl-prolyl cis-trans isomerase A	16	0.980118	6.80317	0.475839	139.967	0.526986	114.767
89191865	NP_000202.2	ITGB2	integrin beta-2 precursor	6	0.907118	28.4273	0.475495	219.991	0.507245	242.135
19923430	NP_054785.2	COMMD5	COMM domain-containing protein 5	1	1.70724	n/a	0.475462	n/a	0.888674	n/a
6005860	NP_009140.1	RPL35	60S ribosomal protein L35	4	0.964699	5.26791	0.474538	2179.67	0.480568	1288.16
4504183	NP_000843.1	GSTP1	glutathione S-transferase P	5	1.03481	6.07475	0.473325	43.9293	0.34017	57.6851
194328699	NP_006322.4	EMG1	ribosomal RNA small subunit methyltransferase NEP1	2	0.604695	n/a	0.472993	n/a	0.568944	n/a
296040507	NP_001171650.1	GYG1	glycogenin-1 isoform 3	1	0.994526	n/a	0.472593	n/a	0.458673	n/a
217272839	NP_060867.2	CHDH	choline dehydrogenase, mitochondrial	1	0.723558	n/a	0.472529	n/a		n/a
23111041	NP_690040.1	SNX3	sorting nexin-3 isoform b	1	1.00481	26.2497	0.472371	8.94617	0.420654	n/a
4759238	NP_004607.1	TSPAN8	tetraspanin-8	2	2.45047	n/a	0.472221	n/a	0.72933	n/a
118498368	NP_004977.2	KTN1	kinectin isoform c	13	0.910514	16.6329	0.471924	78.0136	0.383888	80.135
194394161	NP_694992.2	LRRC57	leucine-rich repeat-containing protein 57	1	0.918512	21.7415	0.471157	88.6314	0.312061	6.23553
4504771	NP_002203.1	EIF6	eukaryotic translation initiation factor 6 isoform a	2	0.960193	14.4985	0.471049	25.3645	0.436126	26.5416
31657142	NP_852478.1	ITGA1	integrin alpha-1 precursor	7	1.00146	13.6717	0.470887	14.4169	0.542434	82.3119
385251374	NP_001245249.1	TP53I11	tumor protein p53-inducible protein 11	2	0.87731	n/a	0.4703	n/a	0.45179	n/a
56676393	NP_001166.3	ARHGDIB	rho GDP-dissociation inhibitor 2	3	1.01783	28.819	0.469728	14.2447	0.424683	13.5825
460417294	NP_001264069.1	ACTR3	actin-related protein 3 isoform 2	2	0.979327	29.3212	0.468801	11.7029	0.389701	88.425
4507953	NP_003397.1	YWHAZ	14-3-3 protein zeta/delta	11	0.951731	12.2556	0.468243	123.007	0.38913	125.943
73486661	NP_001082.2	AOC1	amiloride-sensitive amine oxidase [copper-containing] isoform 2 precursor	3	0.977298	0.557972	0.466493	1.15029	0.472717	0.0450047
34485727	NP_005328.2	NCKAP1L	nck-associated protein 1-like isoform 1	2	1.02194	0.917895	0.465542	4.79453	0.46882	6.6704
309747091	NP_001185470.1	ERAP1	endoplasmic reticulum aminopeptidase 1 isoform b precursor	8	0.973525	20.1684	0.465526	66.915	0.477559	68.4743
4507943	NP_003391.1	XPO1	exportin-1	3	0.888021	0.397846	0.464695	179.344	0.516587	148.93
18375673	NP_002902.2	UPF1	regulator of nonsense transcripts 1	5	0.772264	37.3617	0.46302	19.2833	0.363808	2.04336
256773260	NP_036591.2	TIMM8B	mitochondrial import inner membrane translocase subunit Tim8 B	1	0.985817	n/a	0.462733	n/a	0.371247	n/a
55956916	NP_004989.2	MYO1E	unconventional myosin-Ie	6	0.977247	7.35975	0.462423	78.5976	0.516967	61.4131
4506557	NP_002928.1	RNASE4	ribonuclease 4 precursor	1	1.24209	n/a	0.462329	n/a	0.568089	n/a
21361120	NP_001290.2	CNN1	calponin-1	3	0.909907	12.0378	0.46149	86.2602	0.496287	184.61
21450663	NP_659407.1	CXorf38	uncharacterized protein CXorf38	1	0.955473	n/a	0.459828	n/a	0.544084	n/a
32189392	NP_005800.3	PRDX2	peroxiredoxin-2	5	1.01426	13.2312	0.459604	141.794	0.461664	101.416
4757766	NP_004299.1	ARHGAP1	rho GTPase-activating protein 1	2	1.83349	n/a	0.45925	n/a		n/a
4826830	NP_004983.1	MECP2	methyl-CpG-binding protein 2 isoform 1	6	1.02121	6.06459	0.458555	87.0464	0.704694	87.4538
4506741	NP_001002.1	RPS7	40S ribosomal protein S7	6	0.969296	23.4015	0.457708	343.654	0.474794	259.174
29725609	NP_005219.2	EGFR	epidermal growth factor receptor isoform a precursor	2	0.928715	12.4436	0.457478	n/a	0.467882	n/a
4827038	NP_005070.1	TPD52	tumor protein D52 isoform 3	6	0.937814	11.7561	0.45725	27.1971	0.227036	140.833
338968892	NP_001229807.1	ELP2	elongator complex protein 2 isoform 5	1	2.2048	n/a	0.457186	n/a	0.643711	n/a
57863271	NP_055873.1	VWA8	von Willebrand factor A domain-containing protein 8 isoform a precursor	2	0.861313	6.09939	0.45692	56.5888	0.471639	61.6426
313760537	NP_001186421.1	PDCD4	programmed cell death protein 4 isoform 3	4	0.967207	4.01773	0.456491	6.9996	0.642485	62.5297
9910352	NP_064530.1	SH3GLB2	endophilin-B2	3	0.944676	4.28815	0.455935	83.5781	0.441918	87.0439
392513662	NP_001254738.1	ILF2	interleukin enhancer-binding factor 2 isoform 2	9	0.951169	24.7688	0.45579	73.8552	0.587145	99.6188
109452591	NP_003840.2	SUCLG1	succinyl-CoA ligase [ADP/GDP-forming] subunit alpha, mitochondrial precursor	11	0.901935	16.2474	0.455381	113.722	0.309556	244.523
31543415	NP_443082.2	GADD45GIP1	growth arrest and DNA damage-inducible proteins-interacting protein 1	2	1.00654	8.90454	0.455124	13.3613	0.592499	25.8399
190885499	NP_004246.2	COX5A	cytochrome c oxidase subunit 5A, mitochondrial precursor	2	0.963884	7.96145	0.455047	55.3595	0.637636	22.8513
5031977	NP_005737.1	NAMPT	nicotinamide phosphoribosyltransferase precursor	6	0.98862	2.90887	0.45488	44.5212	0.363578	97.4568
92859701	NP_004990.3	MYO6	unconventional myosin-VI	10	0.927816	10.011	0.454189	73.0342	0.520056	101.532
4758958	NP_004148.1	PRKAR2A	cAMP-dependent protein kinase type II-alpha regulatory subunit	5	1.01399	22.8553	0.453696	113.601	0.831913	36.2347
148727341	NP_009109.3	STRAP	serine-threonine kinase receptor-associated protein	1	0.764998	n/a	0.453623	n/a	0.467659	n/a
170932518	NP_079433.3	PXN	paxillin isoform 4	1	1.0268	n/a	0.453429	n/a	0.372648	n/a
51873064	NP_000519.2	MAN2B1	lysosomal alpha-mannosidase isoform 1 precursor	6	0.951649	15.9653	0.45341	117.117	0.364043	171.357
4503349	NP_001366.1	DNASE2	deoxyribonuclease-2-alpha precursor	1	0.983918	n/a	0.453393	n/a		n/a
150378533	NP_003461.2	USP7	ubiquitin carboxyl-terminal hydrolase 7	2	0.886586	9.99053	0.453361	213.247	0.390079	175.906
4506289	NP_002818.1	PTPN1	tyrosine-protein phosphatase non-receptor type 1	1	1.18939	n/a	0.453078	n/a	0.545214	n/a
5902134	NP_009005.1	CORO1A	coronin-1A	9	0.948298	8.83803	0.449845	115.272	0.333418	138.144
7705369	NP_057535.1	COPB1	coatomer subunit beta	9	0.924756	7.1035	0.449363	103.087	0.414093	77.4135
7657058	NP_055054.1	EIF2B2	translation initiation factor eIF-2B subunit beta	1	0.972437	n/a	0.448814	n/a	0.476888	n/a
22035672	NP_006431.2	TXNRD2	thioredoxin reductase 2, mitochondrial precursor	5	0.902489	1.28476	0.448565	9.1088	0.431373	19.5621
4502261	NP_000479.1	SERPINC1	antithrombin-III precursor	4	1.00536	0.548756	0.448036	36.1872	0.452515	4.7681
5901944	NP_008977.1	EMILIN1	EMILIN-1 precursor	4	1.02439	5.12148	0.447367	10.0329	0.466949	15.4591
419636284	NP_001258698.1	AP3B1	AP-3 complex subunit beta-1 isoform 2	6	0.952065	11.5278	0.44699	119.939	0.516155	97.0008
16117796	NP_378669.1	RPL36	60S ribosomal protein L36	1	1.00181	11.3627	0.44686	19.1849	0.364708	9.1777
260656005	NP_001159574.1	NDUFV1	NADH dehydrogenase [ubiquinone] flavoprotein 1, mitochondrial isoform 2 precursor	2	0.91544	2.58058	0.446802	8.59261	0.448857	7.06933
4506597	NP_000967.1	RPL12	60S ribosomal protein L12	10	0.949618	10.2601	0.446595	88.2418	0.628959	71.6504
31543063	NP_660305.2	GLYCTK	glycerate kinase isoform 1	1	0.401831	n/a	0.445947	n/a	0.441342	n/a
[truncated: 1,552 more rows]
