# Supplementary material for: Widespread somatic L1 retrotransposition occurs early during gastrointestinal cancer evolution
Source: HighWire-hosted journal article supplement (doi:10.1101/gr.196238.115), 2015-08-10
Supplement: Table_S6.xlsx.tar.gz [file Ewing et al. Table S6.xlsx]

## Sheet: S6
Table S6: Counts and fractions corresponding to panels d-f in Fig S1.
Total alignments per peak (Fig S1d):	> 0	> 50	> 100	> 150	> 200	> 250	> 300	> 350	> 400	450	500
Colorectal Validated %:	0.425373	0.525253	0.556818	0.542169	0.555556	0.555556	0.55	0.571429	0.60274	0.611111	0.611111
Colorectal Validated Count:	57	52	49	45	45	45	44	44	44	44	44
Pancreas Validated %:	0.251799	0.479167	0.5	0.515152	0.483871	0.518519	0.538462	0.538462	0.541667	0.521739	0.5
Pancreas Validated Count:	35	23	20	17	15	14	14	14	13	12	11
Stomach Validated %:	0.207207	0.5	0.526316	0.526316	0.588235	0.625	0.642857	0.666667	0.636364	0.636364	0.636364
Stomach Validated Count:	23	11	10	10	10	10	9	8	7	7	7
Unique alignments per peak (Fig S1e):	> 0	> 1	> 2	> 3	> 4	> 5	> 6	> 7	> 8	9	10
Colorectal Validated %:	0.425373	0.425373	0.466667	0.490909	0.525253	0.566667	0.597403	0.686567	0.773585	0.847826	0.897436
Colorectal Validated Count:	57	57	56	54	52	51	46	46	41	39	35
Pancreas Validated %:	0.251799	0.251799	0.31068	0.451613	0.464286	0.465116	0.545455	0.555556	0.565217	0.571429	0.6
Pancreas Validated Count:	35	35	32	28	26	20	18	15	13	12	12
Stomach Validated %:	0.207207	0.207207	0.318182	0.457143	0.619048	0.714286	0.8	0.8	0.8	0.714286	0.75
Stomach Validated Count:	23	23	21	16	13	10	8	8	8	5	3
Bases covered per peak (Fig S1f):	> 90	> 110	> 130	> 150	> 170	> 190	> 210	> 230	> 250	270	290
Colorectal Validated %:	0.425373	0.666667	0.720588	0.712121	0.730159	0.728814	0.736842	0.732143	0.74	0.733333	0.75
Colorectal Validated Count:	57	52	49	47	46	43	42	41	37	33	33
Pancreas Validated %:	0.251799	0.358025	0.388889	0.373134	0.370968	0.37931	0.375	0.392157	0.357143	0.368421	0.342857
Pancreas Validated Count:	35	29	28	25	23	22	21	20	15	14	12
Stomach Validated %:	0.207207	0.538462	0.55	0.588235	0.6	0.583333	0.583333	0.545455	0.555556	0.625	0.714286
Stomach Validated Count:	23	14	11	10	9	7	7	6	5	5	5
